# Supplementary material for: Dual-functionalization actuated trimodal attribute in an ultra-robust MOF: exceptionally selective capture and effectual fixation of CO2 with fast-responsive, nanomolar detection of assorted organo-contaminants in water
Source: Royal Society of Chemistry journal article supplement (doi:10.1039/d0qm00721h), 2020-11-03
Supplement: d0qm00721h1.pdf [file d0qm00721h1.pdf]

## Electronic Supplementary Information

### **Dual-functionalization actuated trimodal attribute in an ultra-robust MOF: exceptionally selective capture and effectual fixation of CO<sub>2</sub> with fast-responsive, nanomolar detection of assorted organo-contaminants in water**

Nilanjan Seal,<sup>a,b</sup> Manpreet Singh,<sup>a,b</sup> Sandeep Das,<sup>c</sup> Ranadip Goswami,<sup>a,b</sup> Biswarup Pathak,<sup>c</sup> and Subhadip Neogi<sup>\*,a,b</sup>

<sup>a</sup>Academy of Scientific and Innovative Research (AcSIR), Ghaziabad- 201002, India

<sup>b</sup>Inorganic Materials & Catalysis Division, CSIR-Central Salt & Marine Chemicals Research Institute, Bhavnagar, Gujarat 364002, India

<sup>c</sup>Discipline of Chemistry, Indian Institute of Technology (IIT) Indore, Indore, Madhya Pradesh 453552, India

\*E-mail: [sneogi@csmcri.res.in](mailto:sneogi@csmcri.res.in)

### Table of contents

|     |                                                                                                                                                                                            |                   |
|-----|--------------------------------------------------------------------------------------------------------------------------------------------------------------------------------------------|-------------------|
| 1.  | Materials and Physical measurements                                                                                                                                                        | Page S-3          |
| 2.  | Single Crystal X-ray Crystallography                                                                                                                                                       | Page S-3          |
| 3.  | Experimental section                                                                                                                                                                       | Page S-4          |
| 4.  | Fig. S1. <sup>1</sup> H-NMR spectrum of 4,4',4''-tricarboxytriphenylamine (H <sub>3</sub> TCA).                                                                                            | Page S-5          |
| 5.  | Fig. S2. <sup>13</sup> C-NMR spectrum of 4,4',4''-tricarboxytriphenylamine (H <sub>3</sub> TCA).                                                                                           | Page S-6          |
| 6.  | Fig. S3. ESI-MS spectrum of 4,4',4''-tricarboxytriphenylamine (H <sub>3</sub> TCA).                                                                                                        | Page S-6          |
| 7.  | Fig. S4. (a) Asymmetric unit of <b>CSMCRI-9</b> . (b) Void view of <b>CSMCRI-9</b> along crystallographic c-axis. (c) and (d) Topological representation of <b>CSMCRI-9</b> .              | Page S-7          |
| 8.  | Fig. S5. Thermogravimetric analysis of <b>CSMCRI-9</b> and <b>9a</b> .                                                                                                                     | Page S-7          |
| 9.  | Fig. S6. (a) PXRD pattern of <b>CSMCRI-9</b> and <b>9a</b> . (b) FT-IR spectra (KBr pellets, cm <sup>-1</sup> ) of <b>CSMCRI-9</b> . (c) PXRD pattern of <b>CSMCRI-9</b> in boiling water. | Page S-8          |
| 10. | Fig. S7. (a) N <sub>2</sub> adsorption isotherm of activated <b>CSMCRI-9</b> at 77 K. (b) CO <sub>2</sub> adsorption isotherm of activated <b>CSMCRI-9</b> at 195 K.                       | Page S-8          |
| 11. | Calculations of Adsorption Selectivity by IAST method                                                                                                                                      | Page S-9          |
| 12. | Fig. S8. The isosteric heat of adsorption (Q <sub>st</sub> ) curve for <b>9a</b> .                                                                                                         | Page S-9          |
| 13. | Fig. S9. PXRD patterns of <b>9a</b> obtained after five CO <sub>2</sub> adsorption-desorption cycles.                                                                                      | Page S-10         |
| 14. | Fig. S10 to S19. <sup>1</sup> H-NMR and <sup>13</sup> C-NMR spectra of different cyclic carbonate produced in CO <sub>2</sub> cycloaddition reaction with epoxide.                         | Page S-10 to S-15 |
| 15. | Calculation details of conversion, yield and selectivity for the CO <sub>2</sub> cycloaddition reaction catalyzed by activated <b>CSMCRI-9</b> .                                           | Page S-15 to S-16 |
| 16. | Fig. S20. Recyclability test of the catalyst up to five runs, showing negligible loss in catalytic activity.                                                                               | Page S-16         |
| 17. | Fig. S21. PXRD patterns of <b>9a</b> obtained after five consecutive catalytic cycles of CO <sub>2</sub> cycloaddition reaction.                                                           | Page S-17         |
| 18. | Fig. S22. FT-IR spectra of <b>9a</b> obtained after five consecutive catalytic                                                                                                             | Page S-17         |

|     |                                                                                                                                                                               |                   |
|-----|-------------------------------------------------------------------------------------------------------------------------------------------------------------------------------|-------------------|
|     | cycles of CO <sub>2</sub> cycloaddition reaction.                                                                                                                             |                   |
| 19. | Fig. S23. FE-SEM images of (a), (b) & (c) as-synthesized <b>CSMCRI-9</b> . (d), (e) & (f) Images of <b>9a</b> obtained after five consecutive catalyst recyclability studies. | Page S-18         |
| 20. | Fig. S24. UV-Vis spectra of H <sub>3</sub> TCA, bpg and <b>9a</b> (dispersed in water).                                                                                       | Page S-19         |
| 21. | Fig. S25. Emission intensity of H <sub>3</sub> TCA, <b>9a</b> and a mixture of H <sub>3</sub> TCA with Cd <sup>2+</sup> (dispersed in water).                                 | Page S-19         |
| 22. | Fig. S26. Fluorescence quenching efficiency of <b>9a</b> (1 mg/ 2 mL water) for studied pesticides.                                                                           | Page S-20         |
| 23. | Fig. S27 to S32. Emission spectra of <b>9a</b> upon incremental addition of different pesticide solution.                                                                     | Page S-20 to S-23 |
| 24. | Fig. S33. The curvature of the S–V plot for 1 mM DCNA solution (0 to 200 µL).                                                                                                 | Page S-23         |
| 25. | Fig. S34. Linear region of S–V plot for 1 mM DCNA solution (0 to 200 µL).                                                                                                     | Page S-24         |
| 26. | Fig. S35. Linear region of fluorescence intensity of <b>9a</b> upon addition of DCNA (0 – 200 µL, 10 µM stock solution).                                                      | Page S-24         |
| 27. | Fig. S36. Reproducibility of quenching efficiency of <b>9a</b> towards 1 mM DCNA solution up to five sensing-recovery cycles.                                                 | Page S-25         |
| 28. | Fig. S37. PXRD patterns of <b>9a</b> obtained after five sensing-recovery cycles for DCNA (1 mM).                                                                             | Page S-25         |
| 29. | Fig. S38. HOMO–LUMO energies for bpg linker along with the studied pesticide molecules.                                                                                       | Page S-26         |
| 30. | Fig. S39. Fluorescence quenching efficiency of <b>9a</b> (1 mg/ 2 mL water) towards studied nitroaromatics.                                                                   | Page S-26         |
| 31. | Fig. S40 to S46. Emission spectra of <b>9a</b> upon incremental addition of different nitroaromatic solution.                                                                 | Page S-27 to S-30 |
| 32. | Fig. S47. The curvature of the S–V plot for 1 mM TNP solution (0 to 200 µL).                                                                                                  | Page S-30         |
| 33. | Fig. S48. Linear region of Stern-Volmer (S-V) plot for 1 mM TNP solution (0 to 200 µL).                                                                                       | Page S-31         |
| 34. | Fig. S49. Linear region of fluorescence intensity of <b>9a</b> upon addition of TNP (0 – 200 µL, 10 µM stock solution).                                                       | Page S-31         |
| 35. | Fig. S50. Reproducibility of quenching efficiency of <b>9a</b> towards 1 mM TNP solution up to five sensing-recovery cycles.                                                  | Page S-32         |
| 36. | Fig. S51. PXRD patterns of <b>9a</b> obtained after five sensing-recovery cycles for TNP (1 mM).                                                                              | Page S-32         |
| 37. | Fig. S52. HOMO–LUMO energies for bpg linker along with the studied nitroaromatic molecules.                                                                                   | Page S-33         |
| 38. | Fig. S53. Fluorescence quenching efficiency of <b>9a</b> (1 mg/ 2 mL water) towards studied antibiotics.                                                                      | Page S-33         |
| 39. | Fig. S54 to S61. Emission spectra of <b>9a</b> upon incremental addition of different antibiotic solution.                                                                    | Page S-34 to S-37 |
| 40. | Fig. S62. The curvature of the S–V plot for 1 mM NZF solution (0 to 200 µL).                                                                                                  | Page S-38         |
| 41. | Fig. S63. Linear region of Stern-Volmer (S-V) plot for 1 mM NZF solution (0 to 200 µL).                                                                                       | Page S-38         |

|     |                                                                                                                                                                                                                                              |                   |
|-----|----------------------------------------------------------------------------------------------------------------------------------------------------------------------------------------------------------------------------------------------|-------------------|
| 42. | Fig. S64. Linear region of fluorescence intensity of <b>9a</b> upon addition of NZF (0 – 200 $\mu$ L, 10 $\mu$ M stock solution).                                                                                                            | Page S-39         |
| 43. | Fig. S65. Reproducibility of quenching efficiency of <b>9a</b> towards 1 mM NZF solution up to five sensing-recovery cycles.                                                                                                                 | Page S-39         |
| 44. | Fig. S66. PXRD patterns of <b>9a</b> obtained after five sensing-recovery cycles for NZF (1 mM).                                                                                                                                             | Page S-40         |
| 45. | Fig. S67. Photographs of paper-strips encrusted with <b>9a</b> and after addition of NZF solution, under 365 nm UV-light.                                                                                                                    | Page S-40         |
| 46. | Fig. S68. HOMO–LUMO energies for bpg linker along with the studied antibiotic molecules.                                                                                                                                                     | Page S-41         |
| 47. | Fig. S69. Spectral overlap of the absorption spectrum of <b>9a</b> with the absorption spectra of the DCNA, TNP and NZF.                                                                                                                     | Page S-41         |
| 48. | Table S1. Crystal data and refinement parameters for <b>CSMCRI-9</b> .                                                                                                                                                                       | Page S-42         |
| 49. | Table S2. Number of electrons and molecular mass of guest molecules associated with <b>CSMCRI-9</b> for determination of solvent composition and molecular formula.                                                                          | Page S-43         |
| 50. | Table S3. A comparison for BET surface area, CO <sub>2</sub> adsorption capacity and heat of adsorption of some well reported MOFs at 1 bar.                                                                                                 | Page S-44         |
| 51. | Table S4. A comparison of catalytic performance of activated <b>CSMCRI-9</b> in CO <sub>2</sub> cycloaddition to that of other MOF materials.                                                                                                | Page S-45         |
| 52. | Table S5 to S7. Calculation of standard deviation of fluorescence intensity and limit of detection for <b>9a</b> towards DCNA, TNP and NZF, respectively.                                                                                    | Page S-46 to S-47 |
| 53. | Table S8. Calculation of standard deviation of emission intensities for <b>9a</b> .                                                                                                                                                          | Page S-48         |
| 54. | Table S9 to S11. A comparison of quenching constant, their LOD values, of various luminescent MOFs used for detection of DCNA, TNP and NZF, respectively.                                                                                    | Page S-49 to S-51 |
| 55. | Table S12 to S14. HOMO and LUMO energy levels of different pesticides, nitroanalytes and antibiotics, respectively; calculated by density functional theory (DFT) at B3LYP/6-311++G** accuracy level, using Gaussian 09 package of programs. | Page S-51 to S-52 |

## Materials and Physical measurements

All the solvents and reagents were purchased from commercial sources (except H<sub>3</sub>TCA) and used without further purification. Thermogravimetric analyses (TGA) (heating rate of 10 °C/min under N<sub>2</sub> atmosphere) were performed with a Mettler Toledo Star SW 8.10 system. The Fourier Transform infrared spectra (IR) of the samples were recorded using the KBr pellet method on a Perkin–Elmer GX FTIR spectrometer in the region of 400–4000 cm<sup>-1</sup>. Powder X-ray diffraction (PXRD) data were collected using a PANalytical Empyrean (PIXcel 3D detector) system equipped with Cu K $\alpha$  ( $\lambda$ =1.54 Å) radiation. Microanalyses of the compounds were conducted using elementar vario MICRO CUBE analyzer. UV-Vis spectra recorded using Shimadzu UV-3101 PC spectrometer and the luminescence experiments were performed at

room temperature using a Fluorolog Horiba Jobin Yvon spectrophotometer. Surface area measurement was carried out using Micromeritics ASAP 2020 analyser.

### Single Crystal X-ray Crystallography

Single crystals with suitable dimensions were chosen under an optical microscope and mounted on a glass fibre for data collection. Intensity data for as synthesized colorless crystal of **CSMCRI-9** were collected using graphite-monochromated MoK $\alpha$  ( $\lambda=0.71073$  Å) radiation on a Bruker SMART APEX diffractometer equipped with CCD area detector at 173 K. The linear absorption coefficients, scattering factors for the atoms, and the anomalous dispersion corrections were taken from International Tables for X-ray Crystallography. The data integration and reduction were performed with SAINT<sup>1</sup> software. Absorption corrections to the collected reflections were accounted with SADABS<sup>2</sup> using XPREP.<sup>3</sup> The structure was solved by direct method using SIR-97<sup>4</sup> and was refined on F<sup>2</sup> by the full-matrix least-squares technique using the SHELXL-2014<sup>5</sup> program package. All H atoms were placed in calculated positions using idealized geometries (riding model) and assigned fixed isotropic displacement parameters using the SHELXL default. To give an account of disordered electron densities associated with solvent molecules, the "SQUEEZE" protocol in PLATON<sup>6</sup> was applied that produced a set of solvent free diffraction intensities. Final cycles of least-squares refinements improved both the R values and Goodness of Fit with the modified data set after subtracting the contribution from the disordered solvent molecules, using SQUEEZE program. The crystal and refinement data for solvent free **CSMCRI-9** is listed in Table S1. Topological analysis was performed by using TOPOS software.<sup>7</sup>

### Experimental section

**Synthesis of CSMCRI-9.** A mixture of Cd(NO<sub>3</sub>)<sub>2</sub>·4H<sub>2</sub>O (30 mg, 0.1 mmol), bpg (21.6 mg, 0.05 mmol) and H<sub>3</sub>TCA (19 mg, 0.05 mmol) was dissolved in 4 mL of N,N-Dimethylacetamide (DMA) and 2 mL of distilled water in a 15 mL screw-capped vial by ultrasonic treatment for 15 min. Then it was heated to 85 °C for 4 days, and then slowly cooled down to room temperature. The colorless, shiny and block shaped X-ray quality crystals were obtained; which were then filtered, thoroughly washed with DMA and air dried (yield: 65 %). Anal. Calcd. For [Cd<sub>1.5</sub>(TCA)(bpg)<sub>0.5</sub>(H<sub>2</sub>O)]·3DMA·2H<sub>2</sub>O: C, 45.76; H, 5.12; N, 6.84. Found: C, 44.97; H, 4.93; N, 6.90

**CO<sub>2</sub> Cycloaddition Reaction.** In a 10 mL teflon-lined stainless steel autoclave, 21.91 mmol of epoxide, 0.35 mol % of activated catalyst and 0.36 mol % of Bu<sub>4</sub>N<sup>+</sup>Br<sup>-</sup> were purged with 1.0 MPa of CO<sub>2</sub>. The mixture was heated to 65 °C for 6 h at 600 rpm. After that, the reactor was cooled down and the product was centrifuged to separate the catalyst and analysed by GC and <sup>1</sup>H-NMR. The recovered catalyst was thoroughly washed with acetone followed by air drying and reused for next cycle of experiment.

**Fluorescence Measurements.** In a typical procedure, 1 mg of finely ground **9a** was dispersed in 2 mL of water to form a stable suspension after ultrasonic treatment for two hours. All fluorescence titration experiments were performed by gradually adding aqueous solution of

nitroanalytes (1 mM) and antibiotics (1 mM) {DMF-water mixed solution for pesticides (1 mM)}. Fluorescence detections were performed at the emission wavelength ranging from 370 to 650 nm with an excitation wavelength ( $\lambda_{\text{ex}}$ ) of 338 nm and a slit width of 4 nm at room temperature. During the whole period of performing each titration, the dispersion was continuously stirred to maintain the uniformity. All titrations were conducted thrice, and consistent results were reported.

**Recyclable luminescence experiments.** The reproducibility of **9a** towards sensing of DCNA, TNP and NZF was studied. After the first sensing experiment, the MOF powder was recovered by centrifugation and washed thoroughly with water and air dried. Subsequently, this recovered material was used for the next cycle of experiments.

### Synthesis of the Ligand

The ligand 4,4',4''-tricarboxytriphenylamine ( $\text{H}_3\text{TCA}$ ) was prepared by following a literature method<sup>8</sup> and characterized by NMR and ESI-MS analysis.

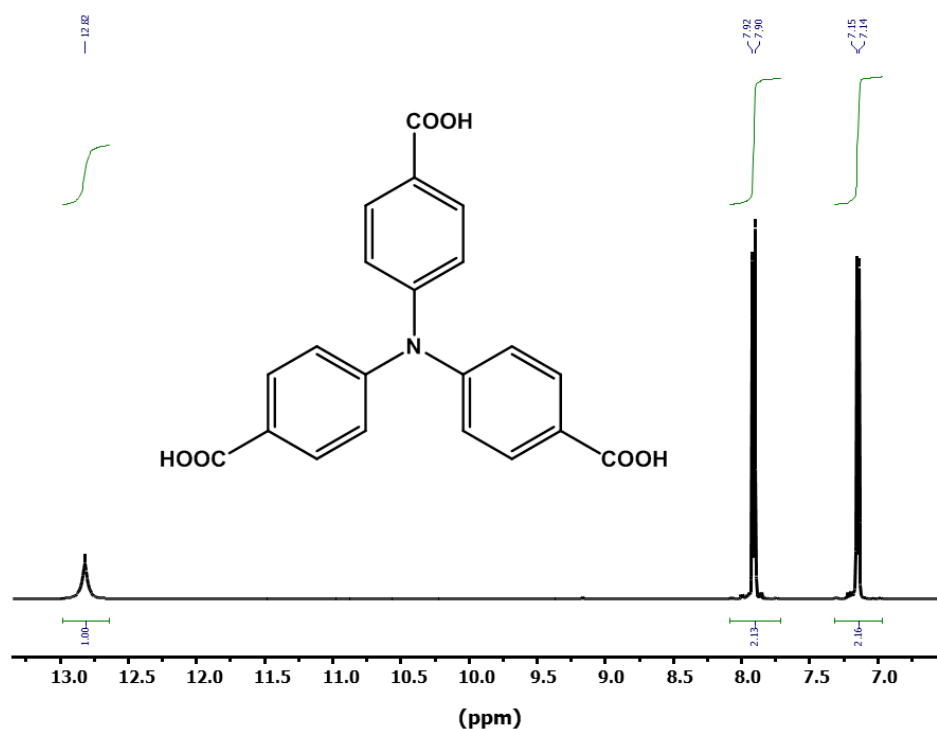

**Fig. S1.**  $^1\text{H}$ -NMR spectrum of 4,4',4''-tricarboxytriphenylamine ( $\text{H}_3\text{TCA}$ ).

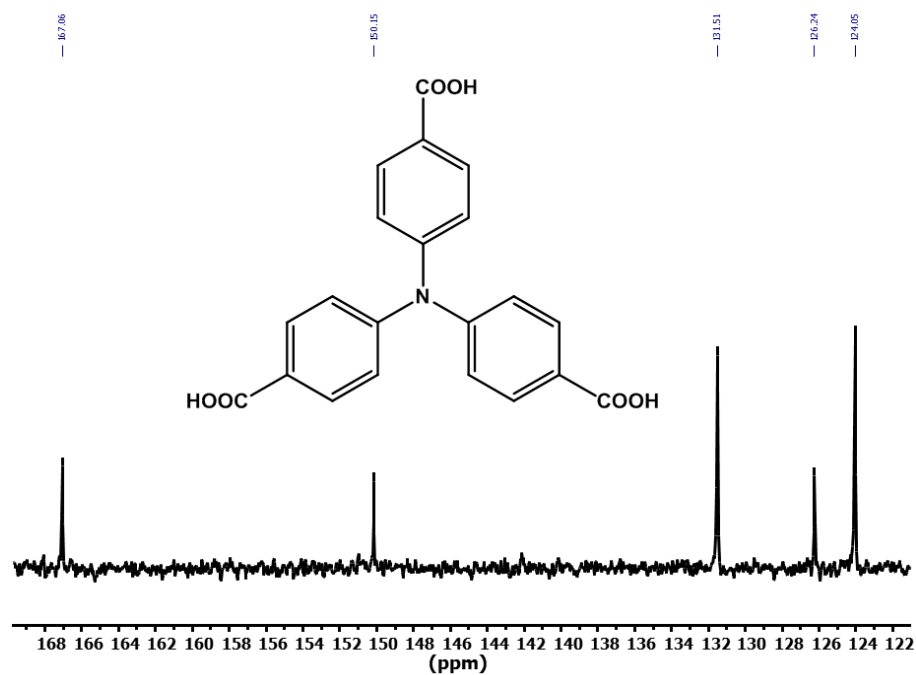

**Fig. S2.** <sup>13</sup>C-NMR spectrum of 4,4',4''-tricarboxytriphenylamine (H<sub>3</sub>TCA).

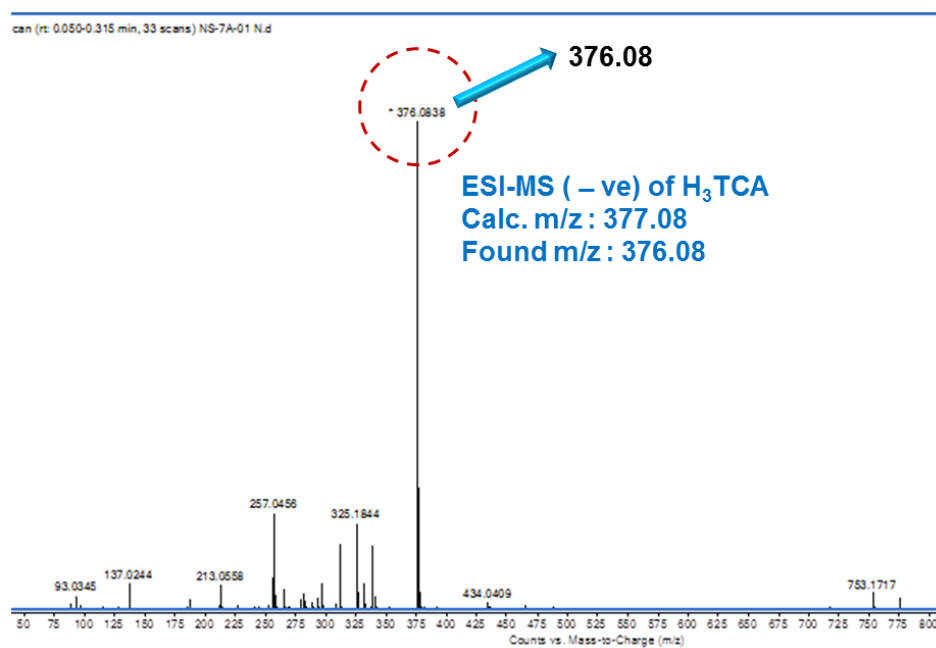

**Fig. S3.** ESI-MS spectrum of 4,4',4''-tricarboxytriphenylamine (H<sub>3</sub>TCA).

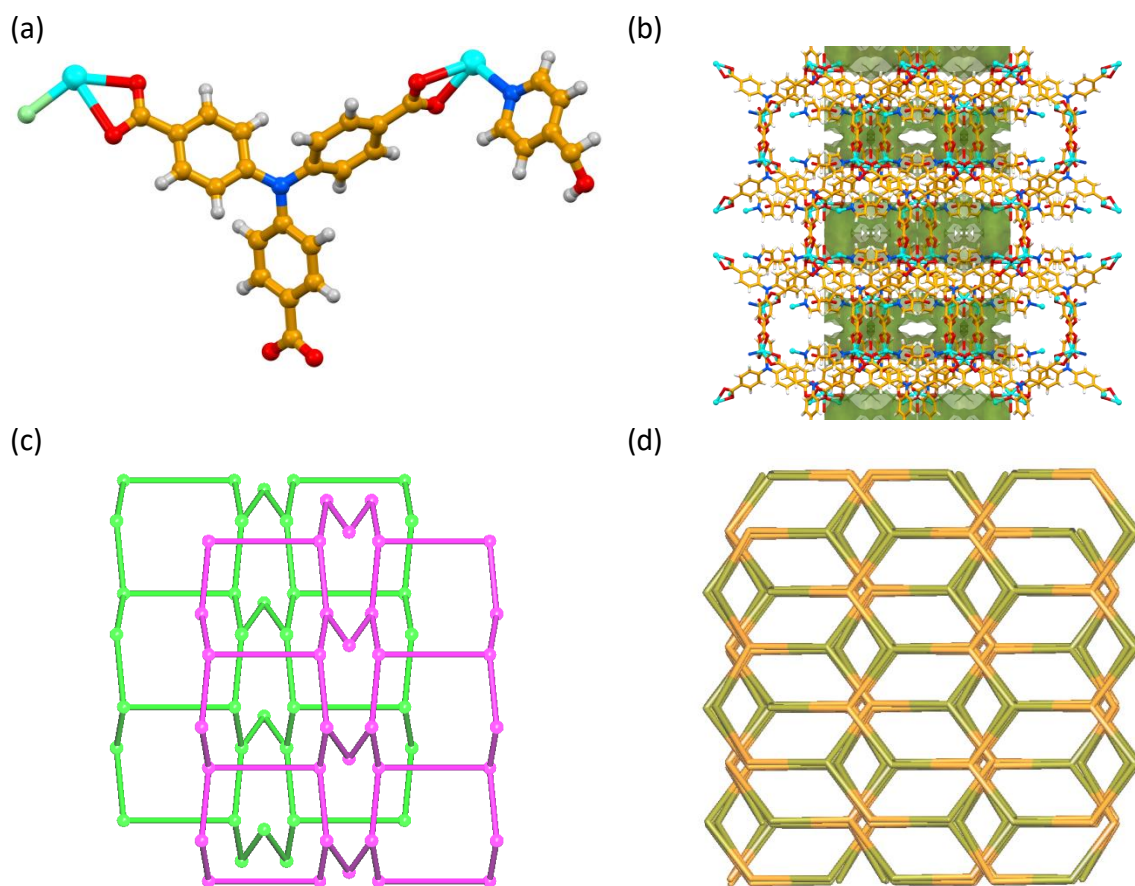

**Fig. S4.** (a) Asymmetric unit of **CSMCRI-9**. (b) Void view of **CSMCRI-9** along crystallographic *c*-axis. (c) and (d) Topological representation of **CSMCRI-9**.

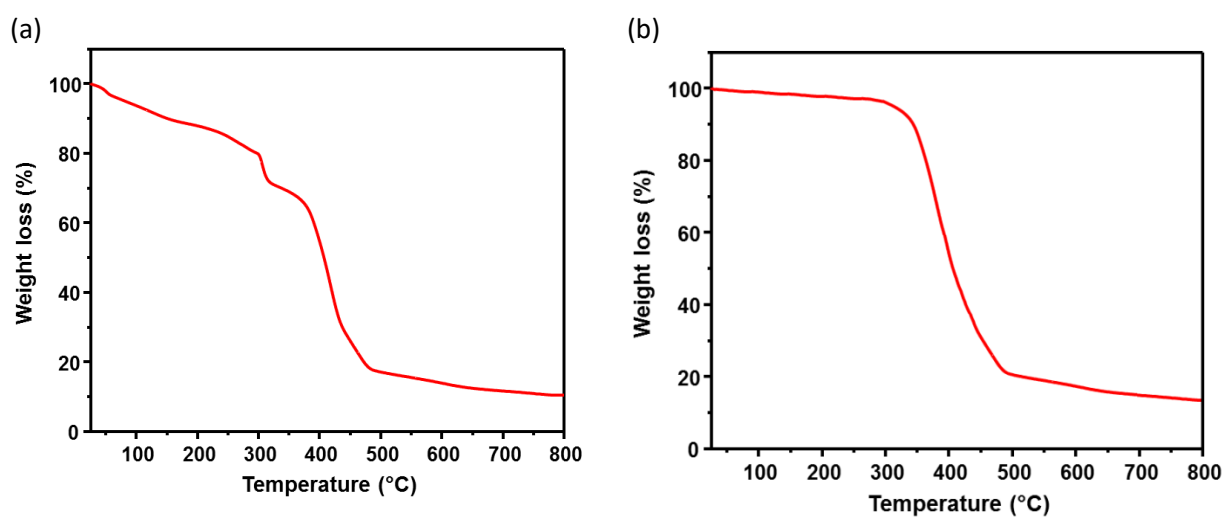

**Fig. S5.** Thermogravimetric analysis of (a) **CSMCRI-9** and (b) **9a**.

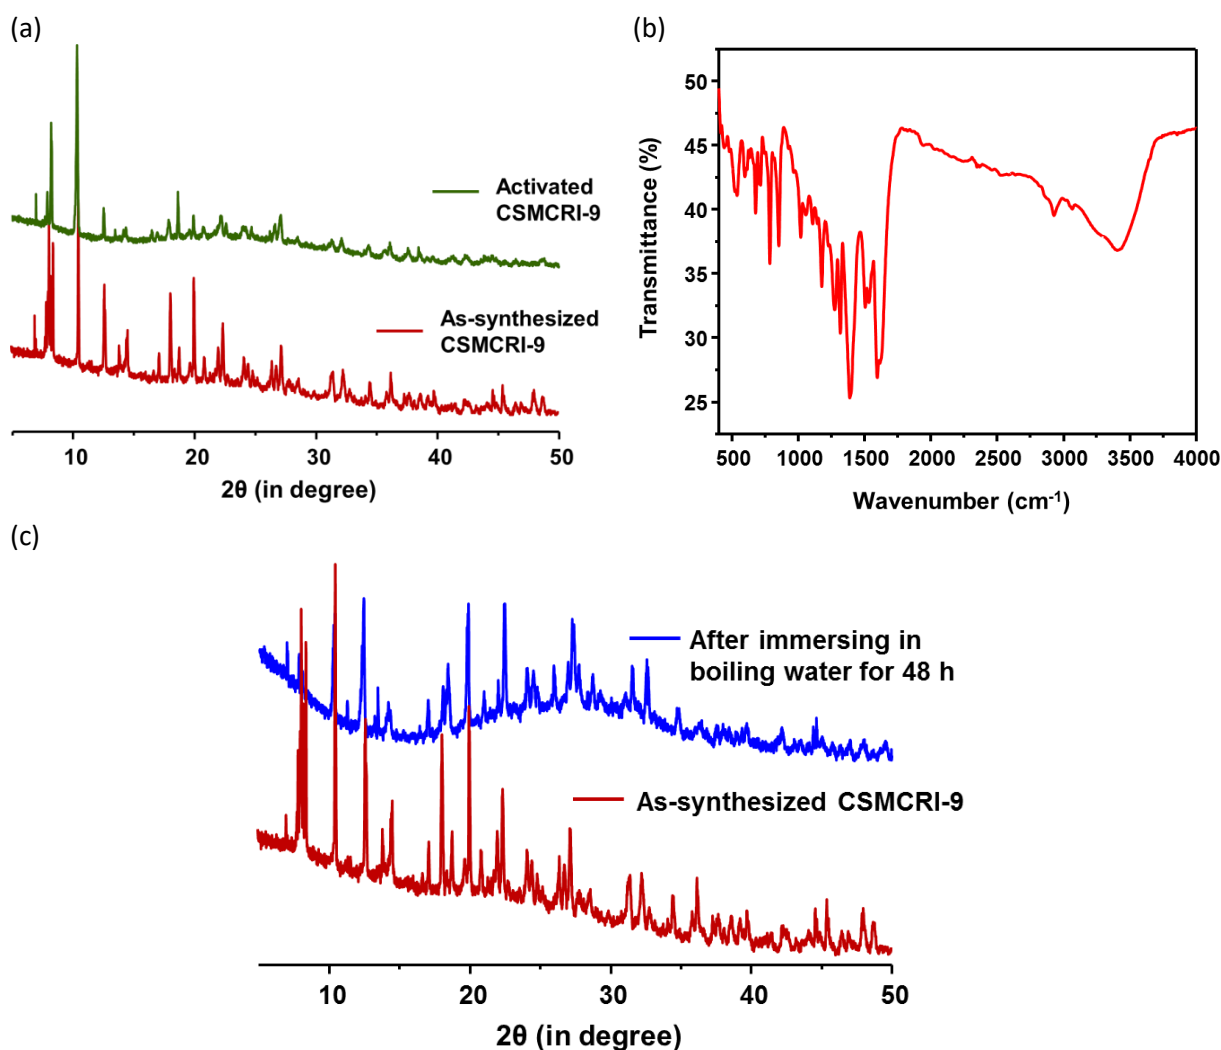

**Fig. S6.** (a) As-synthesized (red) and activated (green) PXRD pattern of **CSMCRI-9**. (b) FT-IR spectra (KBr pellets,  $\text{cm}^{-1}$ ) of **CSMCRI-9**. (c) PXRD pattern of **CSMCRI-9** in boiling water showing structural stability up to 48 hours.

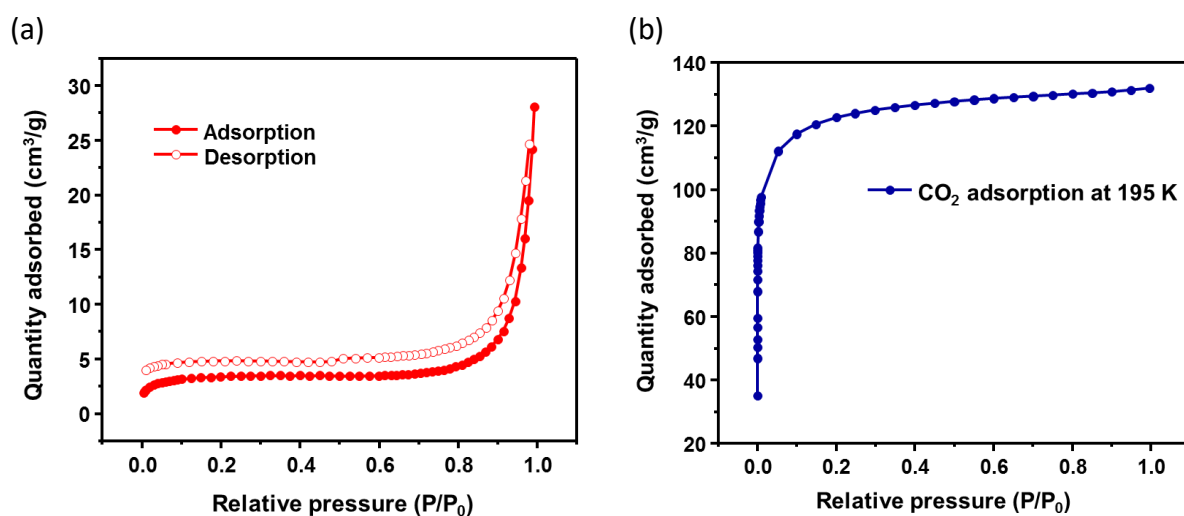

**Fig. S7.** (a) N<sub>2</sub> adsorption isotherm of activated **CSMCRI-9** at 77 K. (b) CO<sub>2</sub> adsorption isotherm of activated **CSMCRI-9** at 195 K.

#### Calculations of Adsorption Selectivity by IAST method

Ideal Adsorption Solution Theory (IAST) was used to predict mixed-gas adsorption equilibria from single component isotherms. The Langmuir equation as given below was successful for fitting our data, where,  $q$  is the adsorbed amount per mass of adsorbent,  $q_m$  is the saturation capacity,  $b$  is the affinity coefficient of adsorption sites, and  $p$  is the pressure of the bulk gas at equilibrium with the adsorbed phase. The fitted parameters were then used to predict single-component adsorption with IAST.

$$q = \frac{q_m b p}{1 + b p}$$

Based on the above equation parameters of pure gas adsorption, we used IAST model to investigate the separation of gas mixtures CO<sub>2</sub>/N<sub>2</sub> and CO<sub>2</sub>/CH<sub>4</sub> with 15/85 composition. The inputs to the IAST calculations are pure-component adsorption isotherms at the temperature of interest, and the output is the adsorption selectivity is defined by the following equation,

$$S_{ads} = \frac{q_{CO_2} / q_{other}}{p_{CO_2} / p_{other}}$$

Where,  $q_{CO_2}$  and  $q_{other}$  are the absolute component loadings of the adsorbed phase in the mixture and  $p_{CO_2}$  and  $p_{other}$  are the corresponding relative pressure.

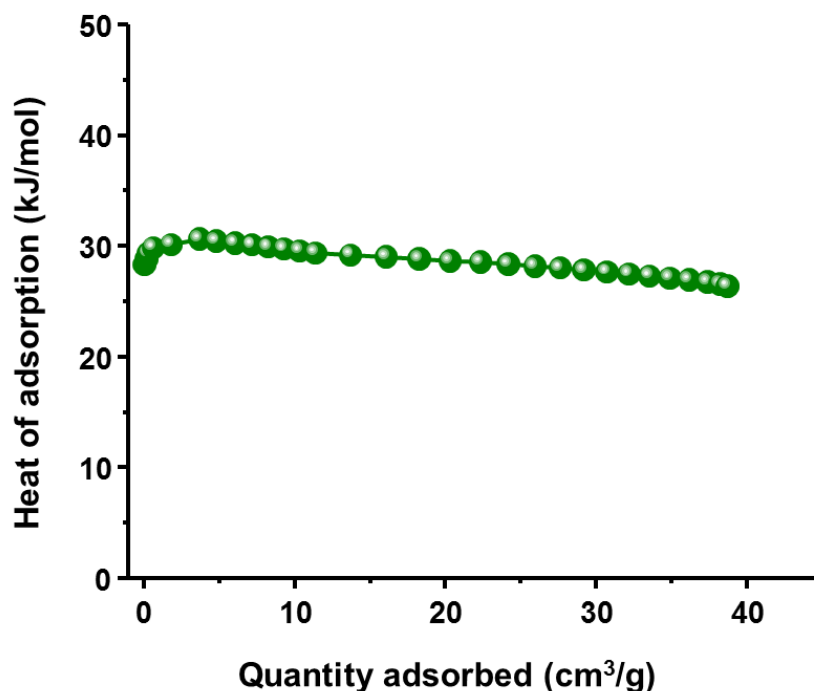

**Fig. S8.** The isosteric heat of adsorption ( $Q_{st}$ ) curve for **9a**.

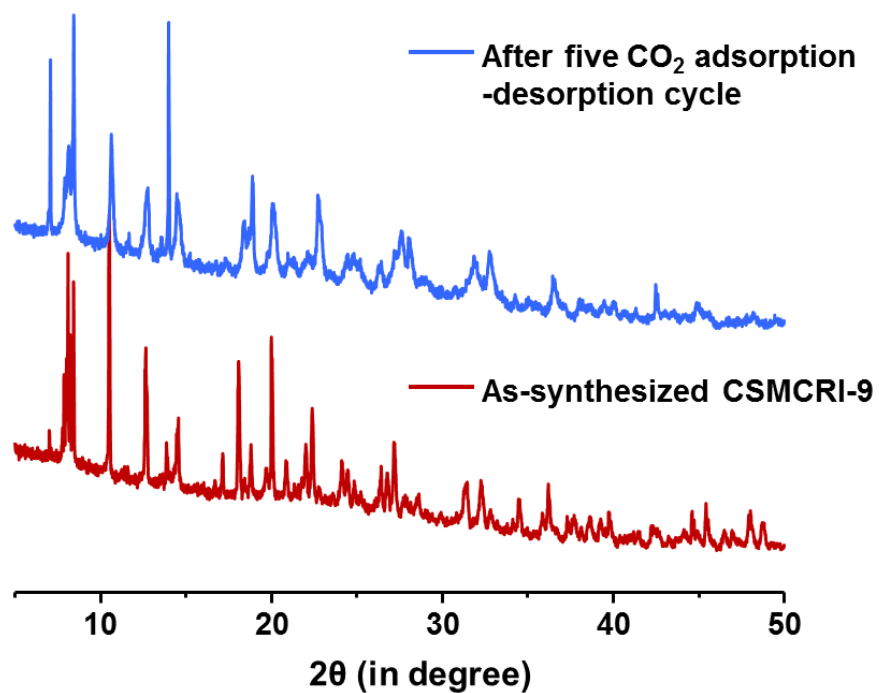

**Fig. S9.** PXRD patterns of **9a** obtained after five CO<sub>2</sub> adsorption-desorption cycles, revealing that structural integrity of the framework is maintained.

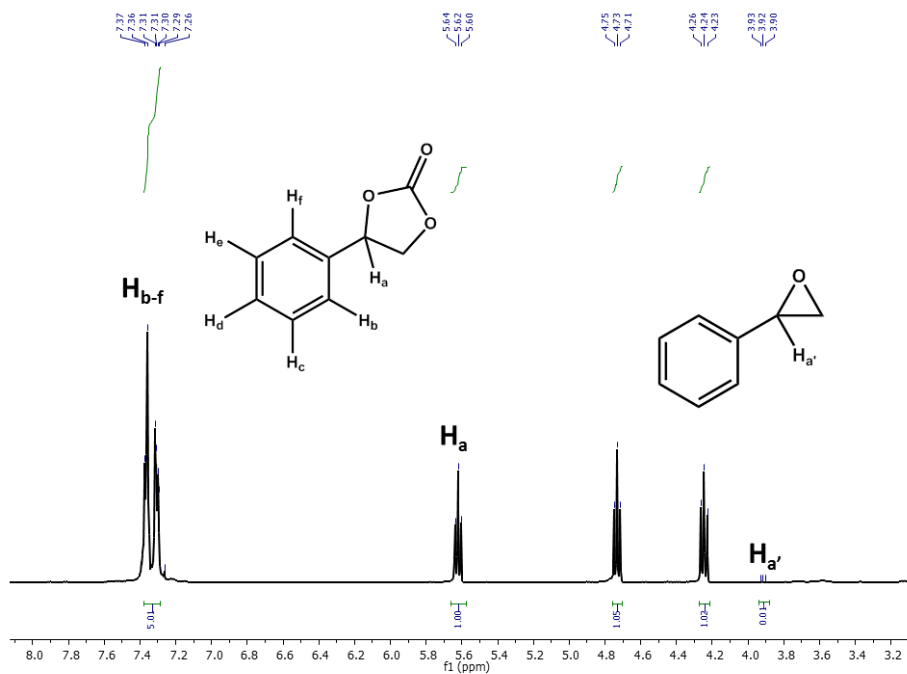

**Fig. S10.** <sup>1</sup>H-NMR spectra of styrene carbonate (4-Phenyl-1,3-dioxolan-2-one). The peak at 7.26 is for CDCl<sub>3</sub>.

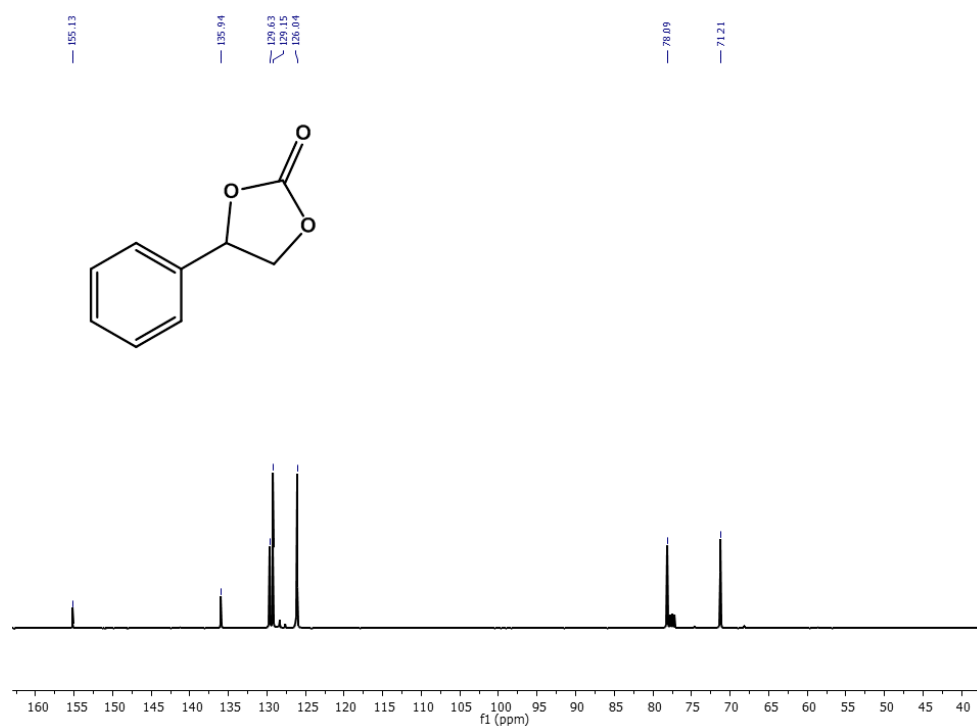

**Fig. S11.** <sup>13</sup>C-NMR spectra of styrene carbonate (4-Phenyl-1,3-dioxolan-2-one).

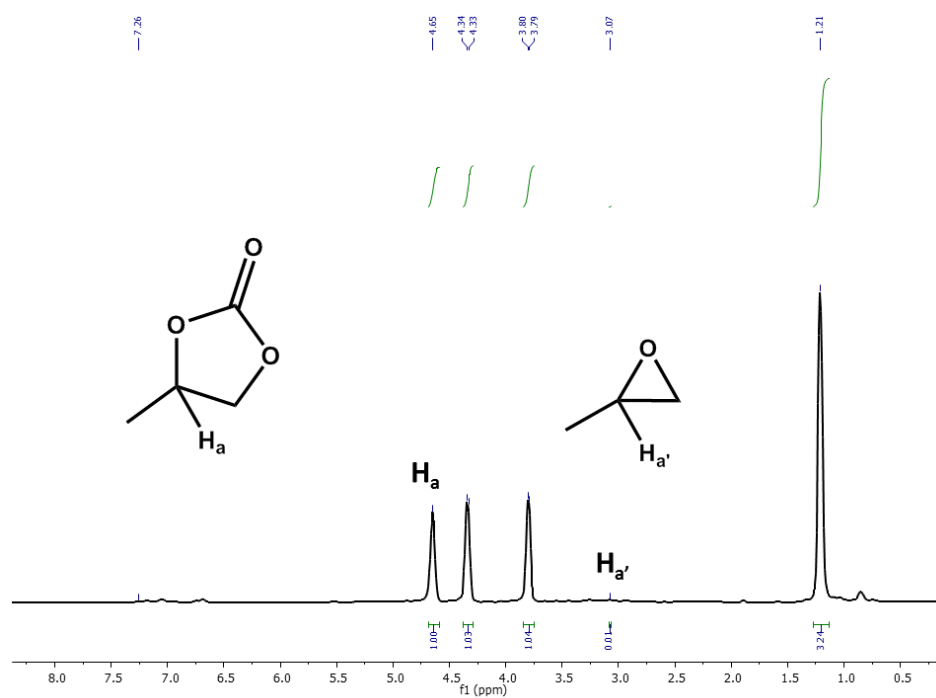

**Fig. S12.** <sup>1</sup>H-NMR spectra of propylene carbonate (4-Methyl-1,3-dioxolan-2-one). The peak at 7.26 is for CDCl<sub>3</sub>.

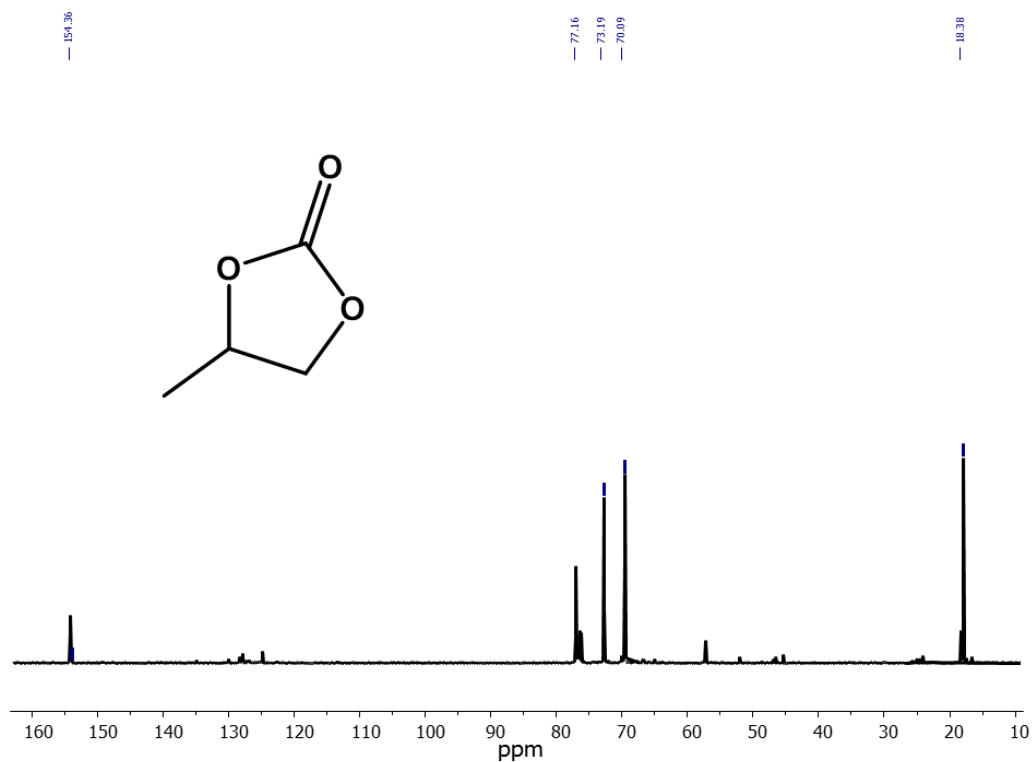

**Fig. S13.** <sup>13</sup>C-NMR spectra of propylene carbonate (4-Methyl-1,3-dioxolan-2-one).

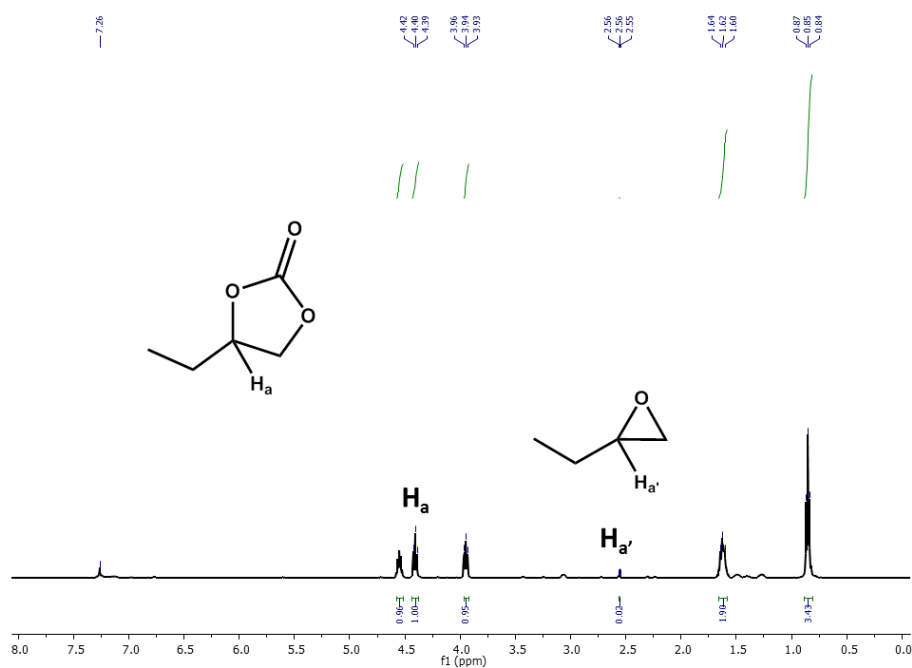

**Fig. S14.** <sup>1</sup>H-NMR spectra of butylene carbonate (4-Ethyl-1,3-dioxolan-2-one). The peak at 7.26 is for CDCl<sub>3</sub>.

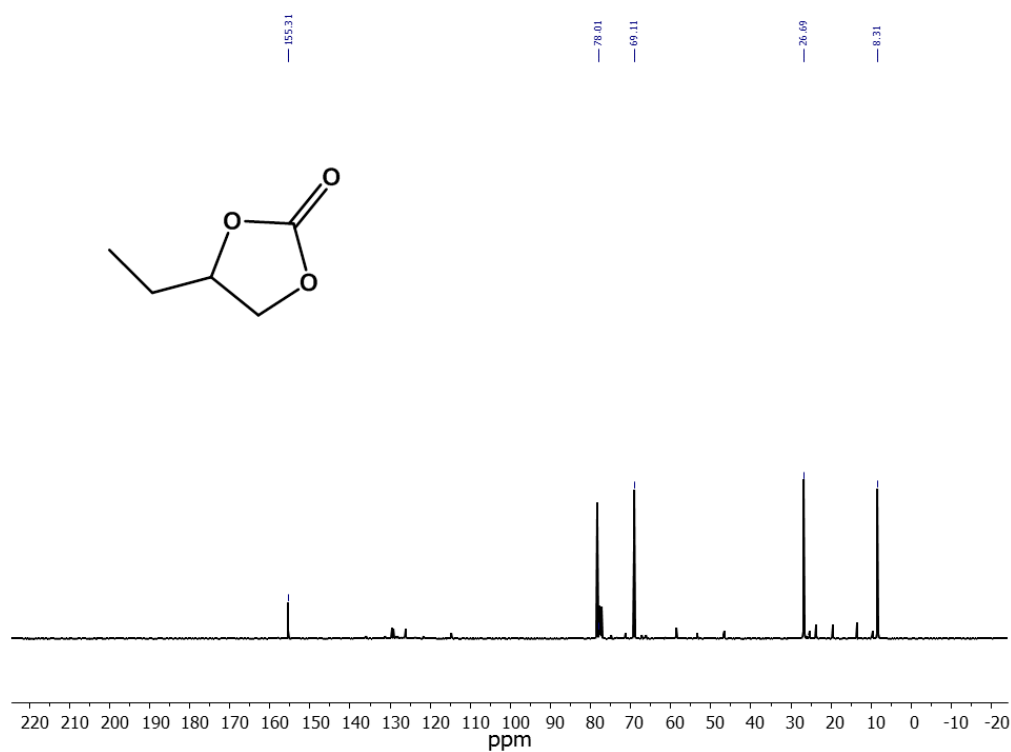

**Fig. S15.** <sup>13</sup>C-NMR spectra of butylene carbonate (4-Ethyl-1,3-dioxolan-2-one).

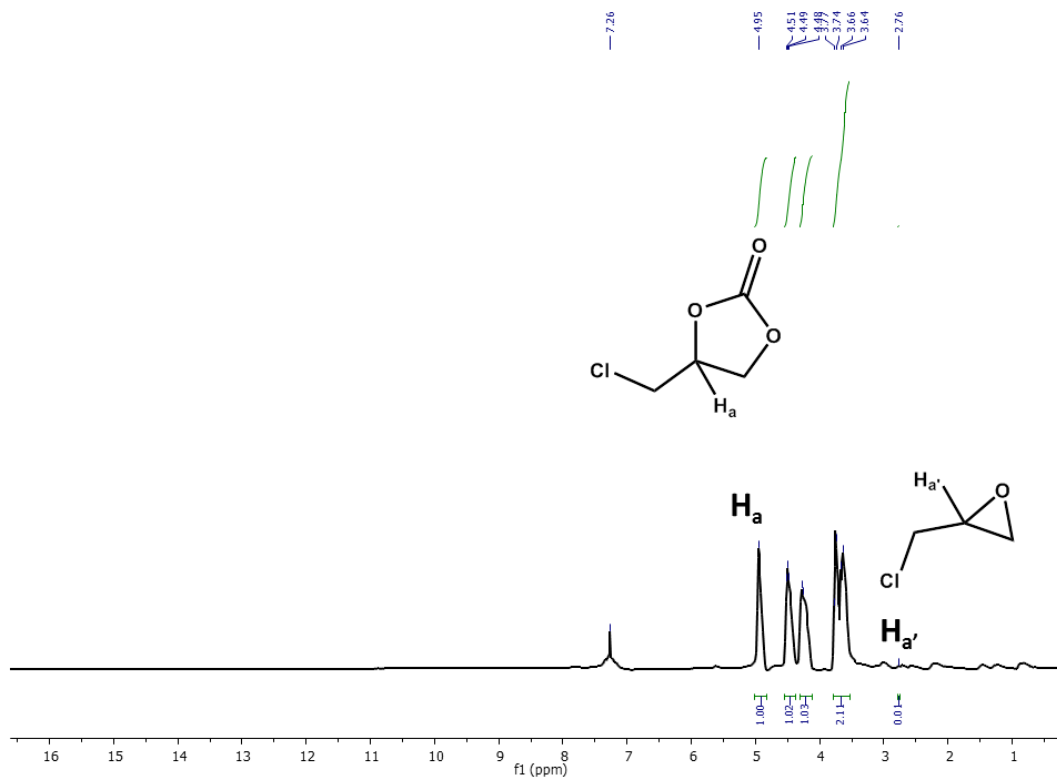

**Fig. S16.** <sup>1</sup>H-NMR spectra of epichlorohydrin carbonate (4-(chloromethyl)-1,3-dioxolan-2-one). The peak at 7.26 is for CDCl<sub>3</sub>.

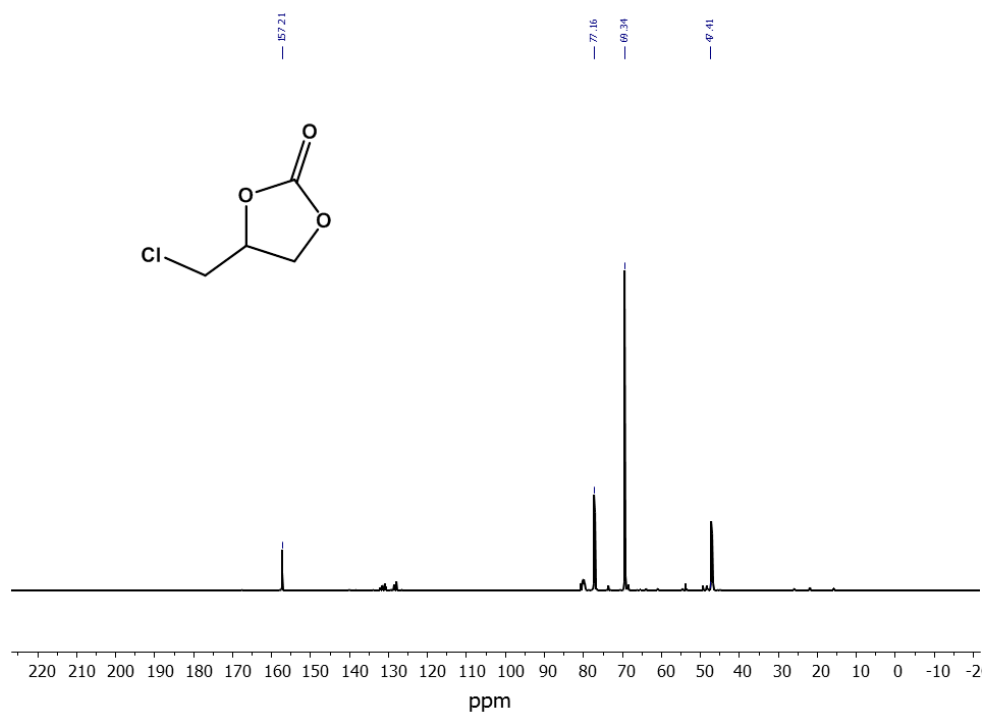

**Fig. S17.** <sup>13</sup>C-NMR spectra of epichlorohydrin carbonate (4-(chloromethyl)-1,3-dioxolan-2-one).

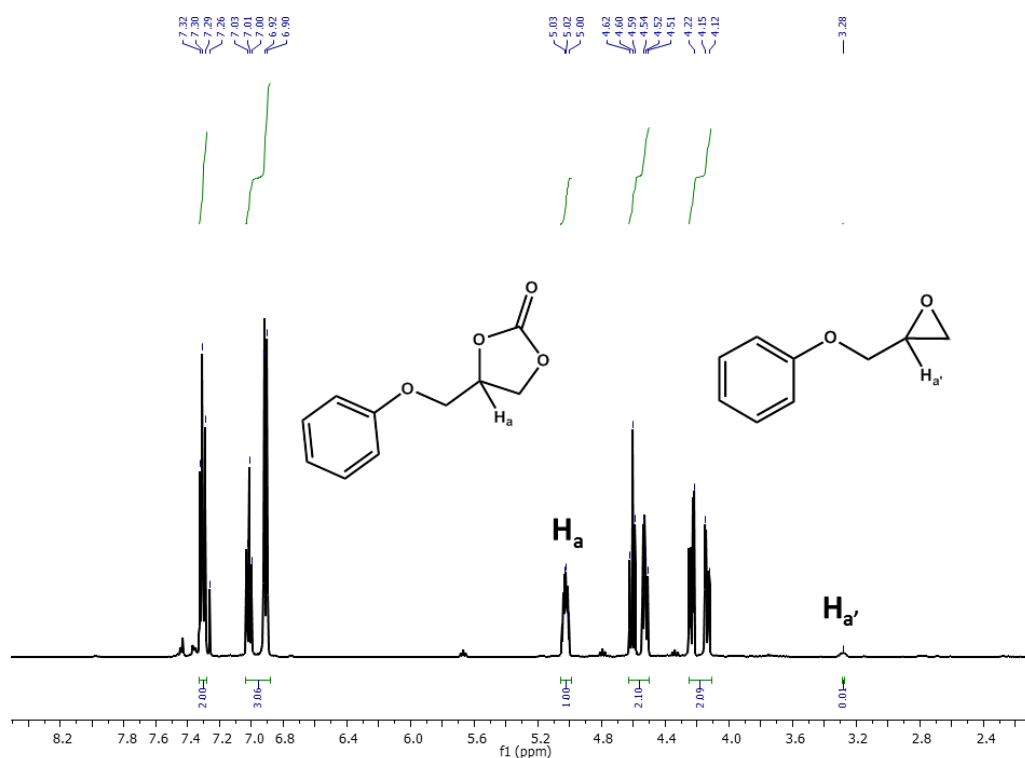

**Fig. S18.** <sup>1</sup>H-NMR spectra of phenyl glycidyl carbonate (4-(phenoxymethyl)-1,3-dioxolan-2-one). The peak at 7.26 is for CDCl<sub>3</sub>.

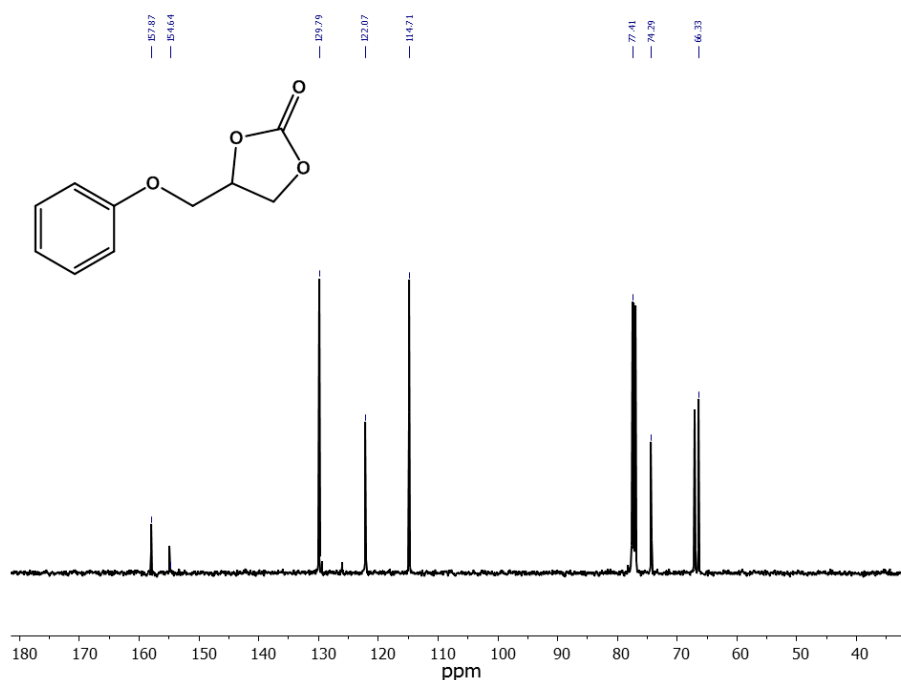

**Fig. S19.**  $^{13}\text{C}$ -NMR spectra of phenyl glycidyl carbonate (4-(phenoxymethyl)-1,3-dioxolan-2-one).

**Calculation details of conversion, yield and selectivity for the  $\text{CO}_2$  cycloaddition reaction catalyzed by activated CSMCRI-9:**

The conversion, yield and selectivity for  $\text{CO}_2$  cycloaddition reaction, catalyzed by activated **CSMCRI-9 (9a)** were calculated from the integral area of the characteristic protons of styrene carbonate, styrene oxide and phenyl ring. From literature reference,<sup>9</sup> the characteristic protons for styrene carbonate and styrene oxide were identified.

The formula are

$$\text{Conversion (\%)} = [1 - \{5I_{\text{Ha}'} / I_{\text{H(b-f)}}\}] \times 100 \%$$

$$\text{Yield (\%)} = \{5I_{\text{Ha}} / I_{\text{H(b-f)}}\} \times 100 \%$$

$$\text{Selectivity (\%)} = [5I_{\text{Ha}} / \{I_{\text{H(b-f)}} - 5I_{\text{Ha}'}\}] \times 100 \%$$

where,  $I_{\text{Ha}}$  is the integral area of the characteristic proton of styrene carbonate;  $I_{\text{Ha}'}$  is the integral area of the characteristic proton of styrene oxide and  $I_{\text{H(b-f)}}$  is the integral area of the protons of phenyl ring.

From Fig. S10, for styrene carbonate,  $I_{\text{Ha}} = 1.00$ ,  $I_{\text{Ha}'} = 0.01$  and  $I_{\text{H(b-f)}} = 5.01$

Therefore, conversion (%) =  $\{1 - (5 \times 0.01 / 5.01)\} \times 100 \% = 99 \%$

Yield (%) =  $(5 \times 1 / 5.01) \times 100 \% = 99.8 \%$

$$\text{Selectivity (\%)} = [(5 \times 1) / \{5.01 - (5 \times 0.01)\}] \times 100 \% = 100 \%$$

For the other four compounds, the conversion, yield and selectivity were determined by the following formula

$$\text{Conversion (\%)} = \{I_{\text{Ha}} / (I_{\text{Ha}} + I_{\text{Ha}'})\} \times 100 \%$$

$$\text{Yield (\%)} = \{I_{\text{Ha}} / (I_{\text{Ha}} + I_{\text{Ha}'})\} \times 100 \%$$

$$\text{Selectivity (\%)} = (\text{Yield of the desired product} / \text{total yield of the products}) \times 100 \%$$

From Fig. S16, for epichlorohydrine carbonate,  $I_{\text{Ha}} = 1.00$ ,  $I_{\text{Ha}'} = 0.01$

$$\text{Therefore, conversion for epichlorohydrine carbonate} = \{1 / (1 + 0.01)\} \times 100 \% = 99 \%$$

$$\text{yield of epichlorohydrine carbonate} = \{1 / (1 + 0.01)\} \times 100 \% = 99 \%$$

$$\text{selectivity} = \{0.99 / (0.99 + 0.01)\} \times 100 \% = 99 \%$$

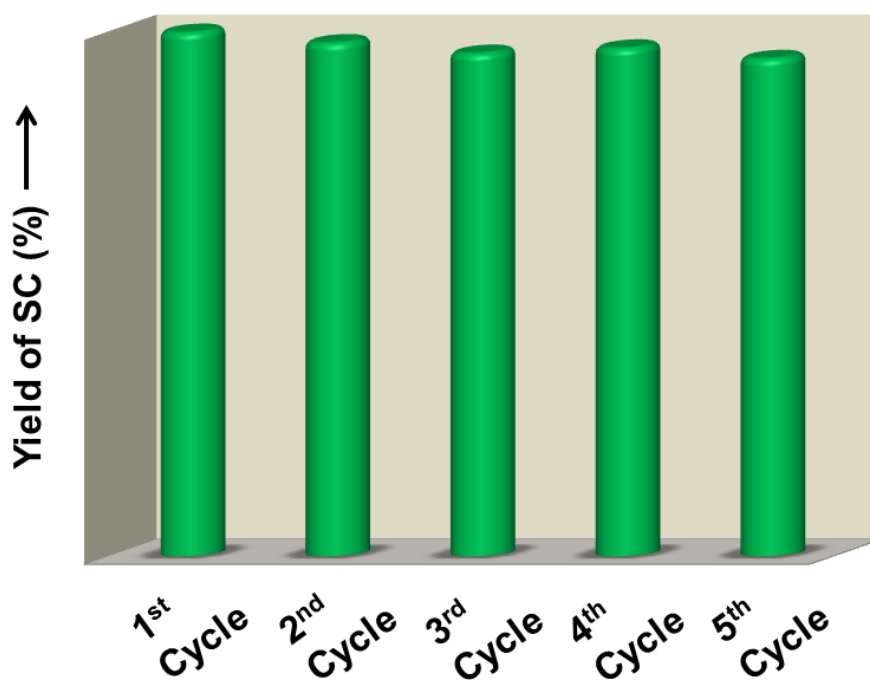

**Fig. S20.** Recyclability test of the catalyst up to five runs, showing negligible loss in catalytic activity.

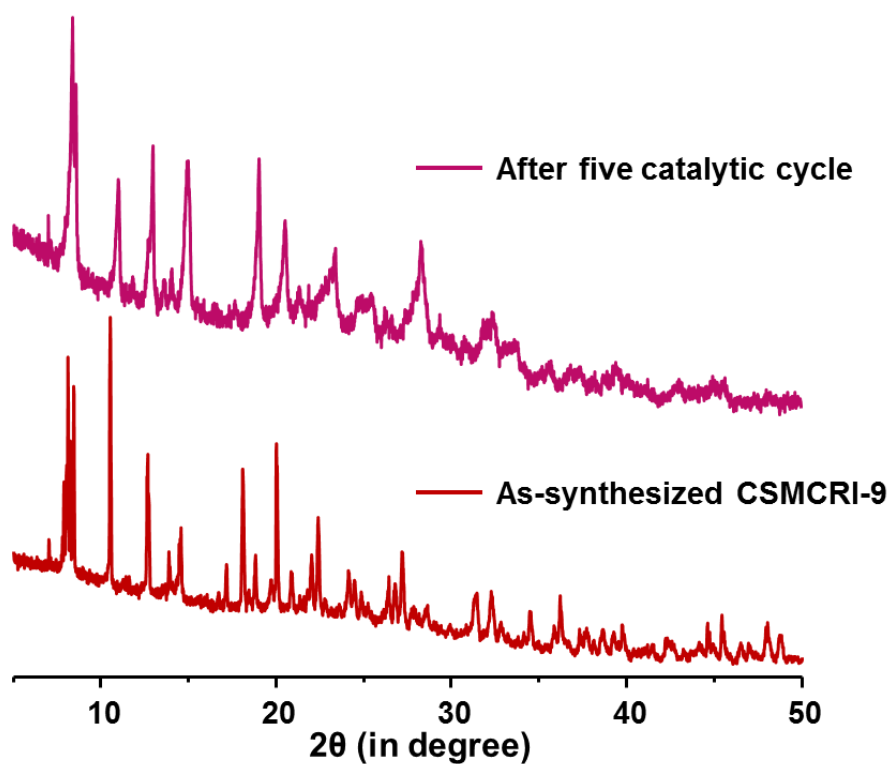

**Fig. S21.** PXRD patterns of **9a** obtained after five consecutive catalytic cycles of  $\text{CO}_2$  cycloaddition reaction, revealing that structural integrity of the framework is maintained.

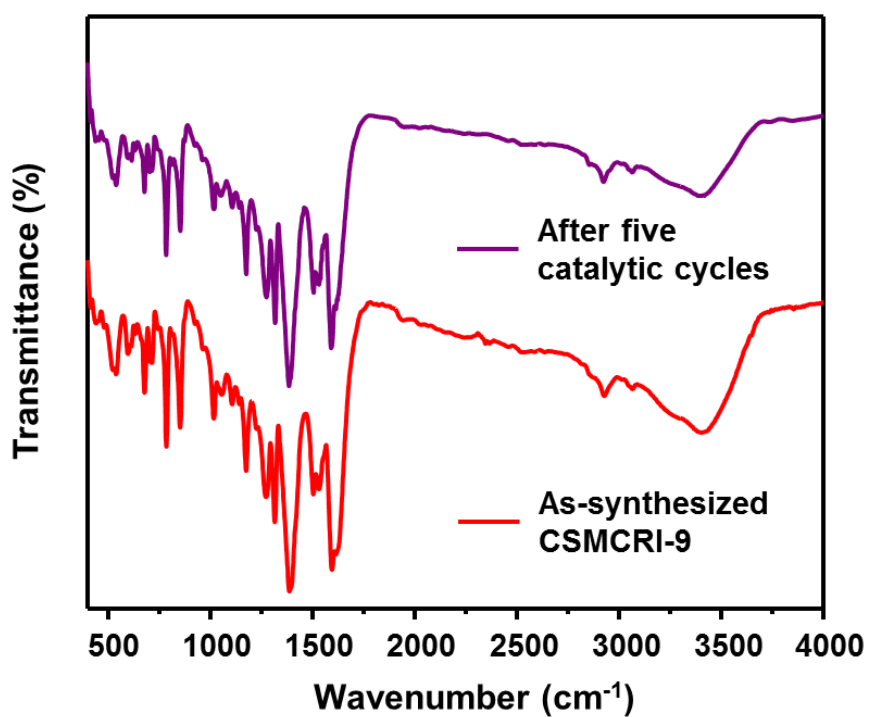

**Fig. S22.** FT-IR spectra of **9a** obtained after five consecutive catalytic cycles of  $\text{CO}_2$  cycloaddition reaction.

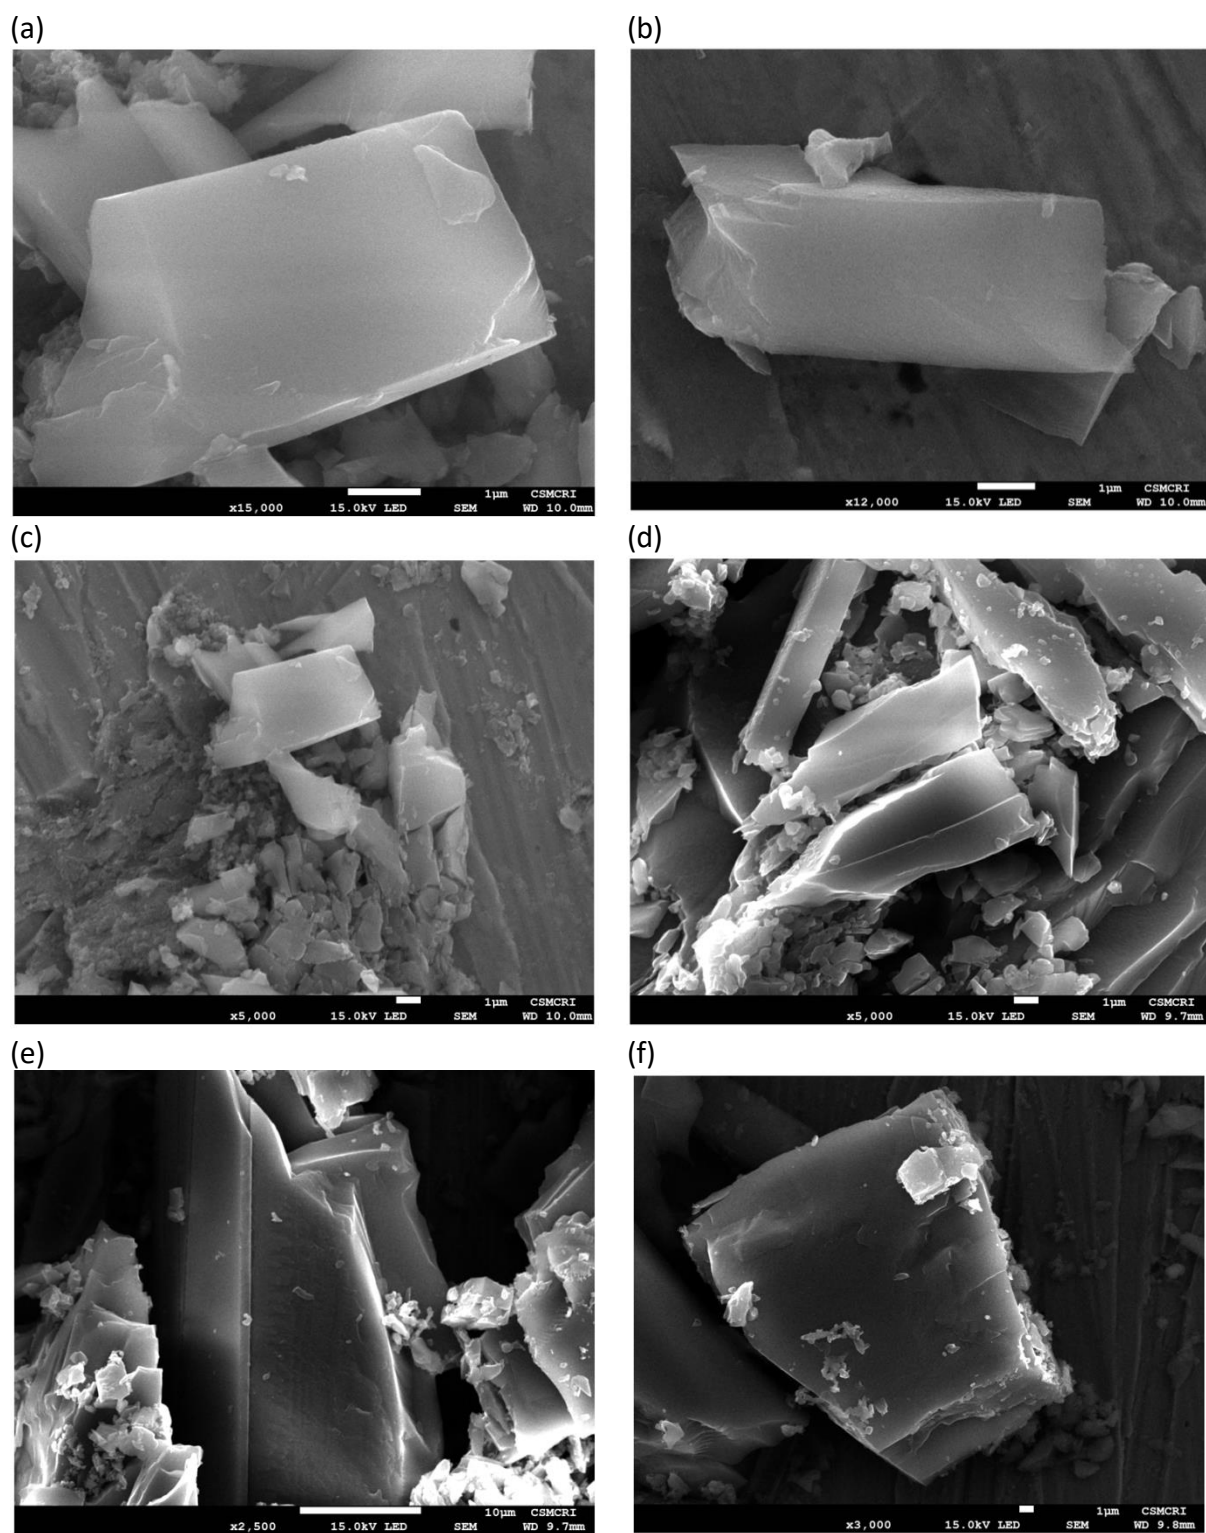

**Fig. S23.** a), b) and c) FE-SEM images of **CSMCRI-9**. d), e) and f) Images of **9a** obtained after five consecutive catalyst recyclability studies showing rectangular block shaped morphology is maintained.

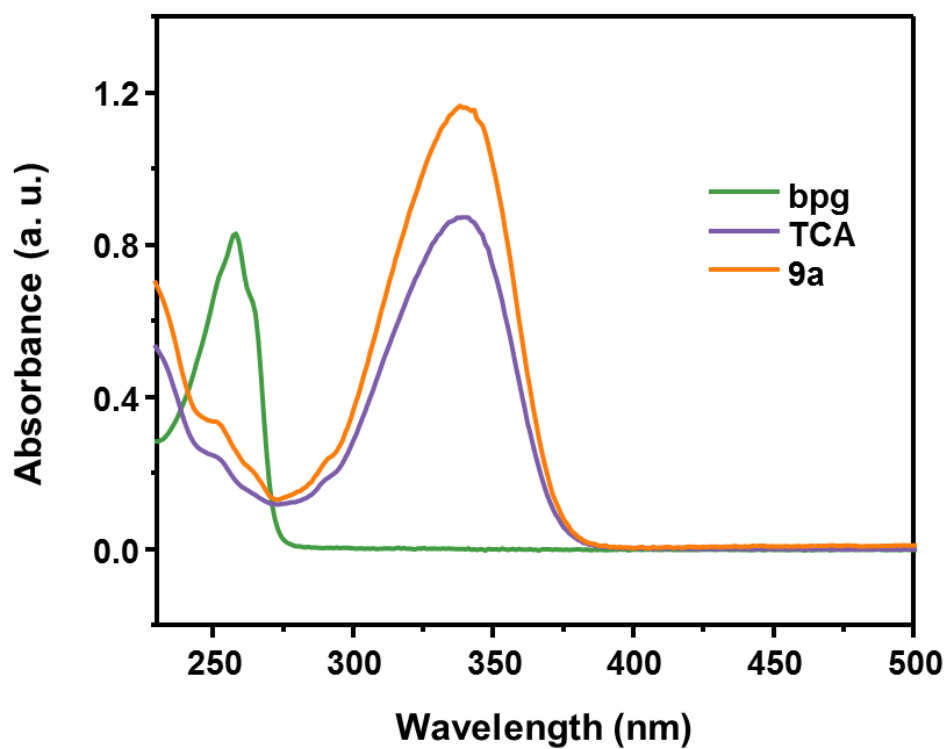

**Fig. S24.** UV-Vis spectra of H<sub>3</sub>TCA, bpg and **9a** (dispersed in water).

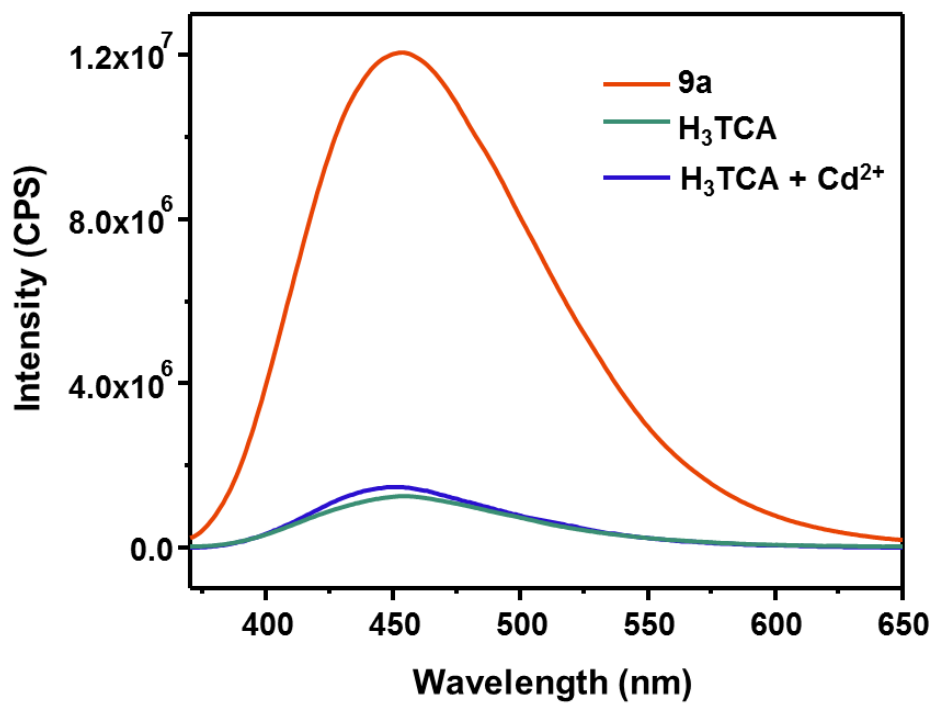

**Fig. S25.** Emission intensity of H<sub>3</sub>TCA, **9a** and a mixture of H<sub>3</sub>TCA with Cd<sup>2+</sup> (dispersed in water).

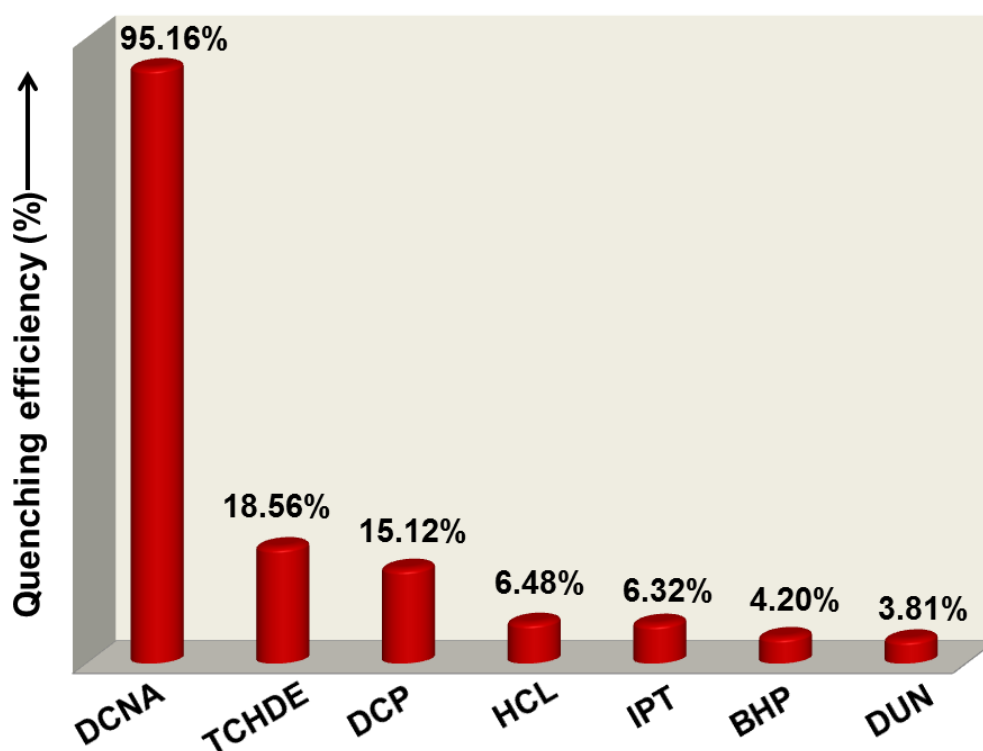

**Fig. S26.** Fluorescence quenching efficiency of **9a** (1 mg/ 2 mL water) for studied pesticides. Quenching efficiency of **9a** is calculated using equation  $(I_0 - I)/I_0 \times 100\%$ , where  $I_0$  and  $I$  denotes the emission intensities before and after the addition of studied pesticides, respectively.

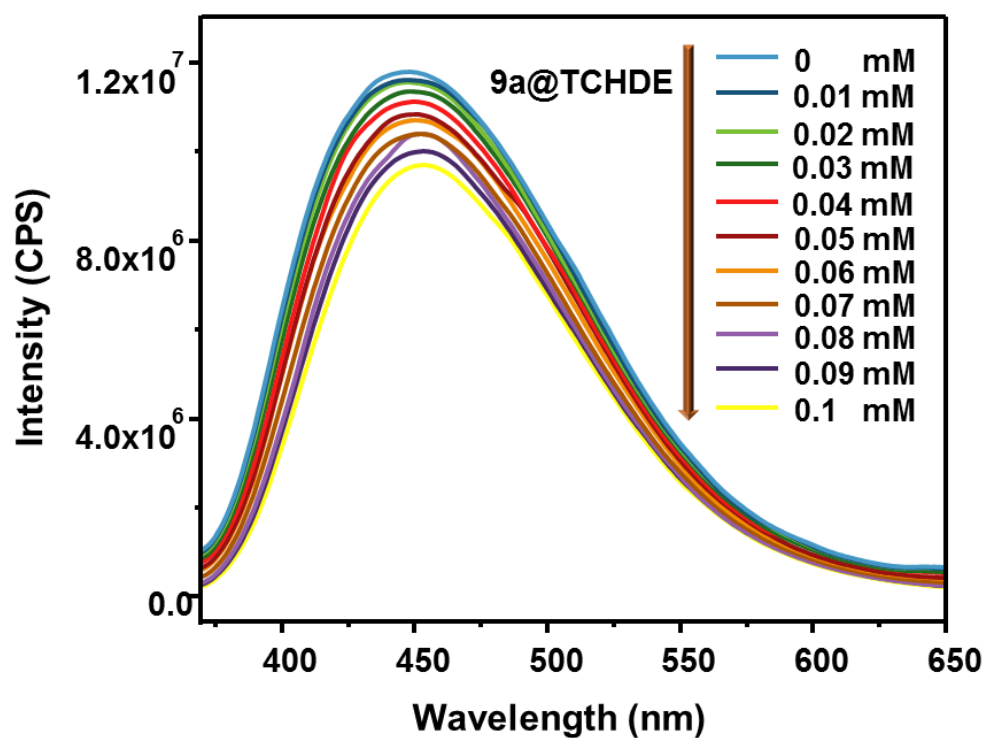

**Fig. S27.** Emission spectra of **9a** upon incremental addition of 2,4,4'-Trichloro-2'-hydroxydiphenyl Ether (TCHDE) solution (1 mM, 200  $\mu$ L).

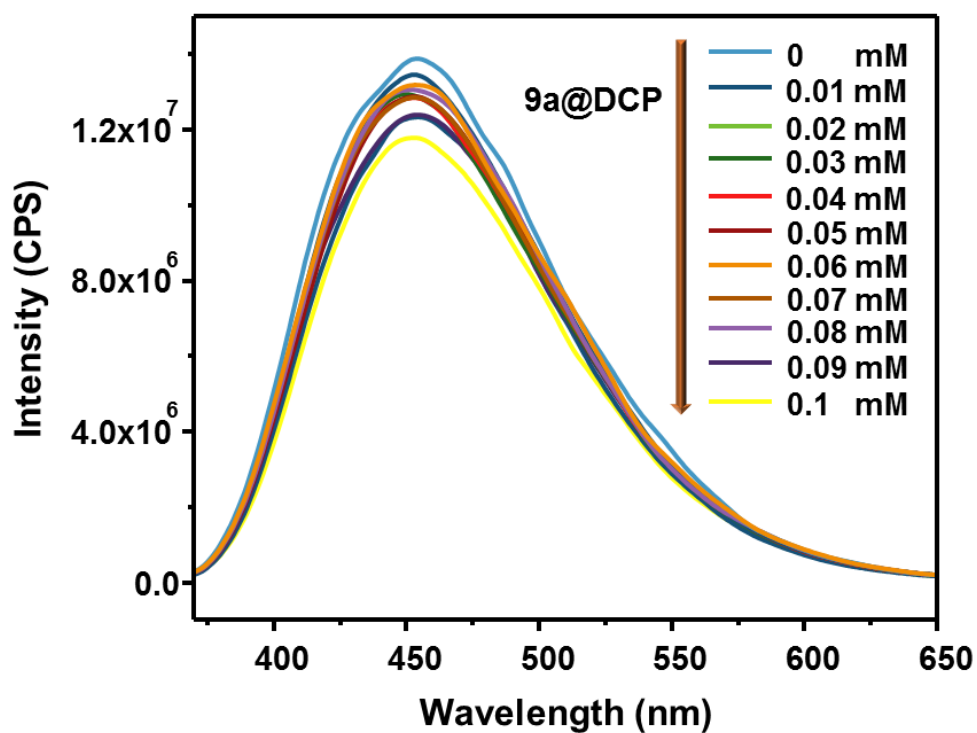

**Fig. S28.** Emission spectra of **9a** upon incremental addition of 2,4-Dichlorophenol (DCP) solution (1 mM, 200  $\mu$ L).

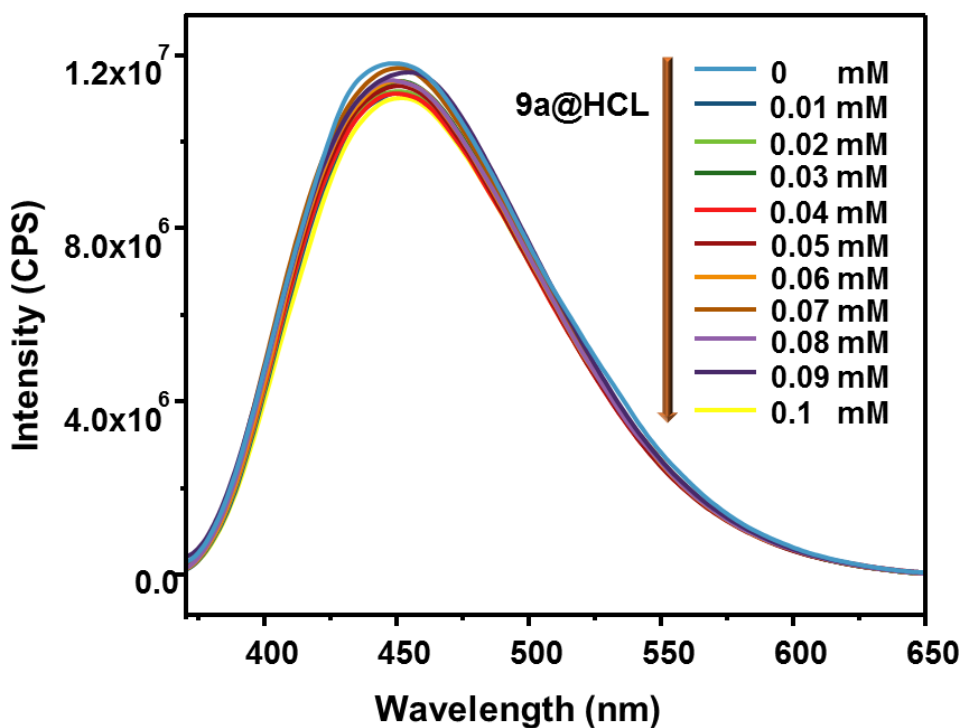

**Fig. S29.** Emission spectra of **9a** upon incremental addition of hexaconazole (HCL) solution (1 mM, 200  $\mu$ L).

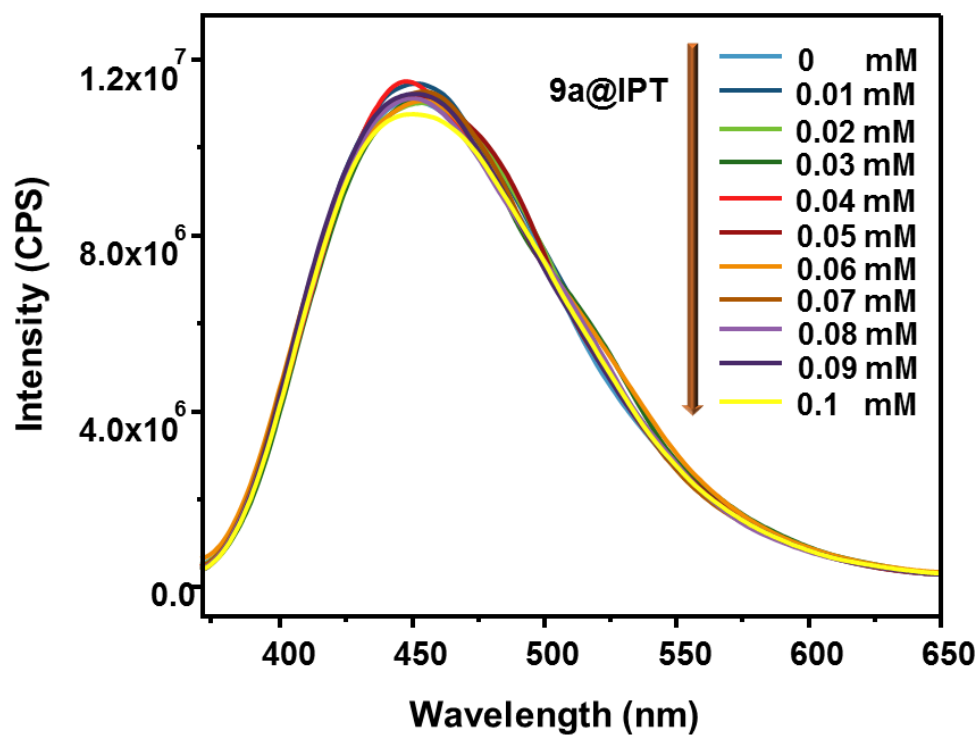

**Fig. S30.** Emission spectra of **9a** upon incremental addition of isoproturon (IPT) solution (1 mM, 200  $\mu$ L).

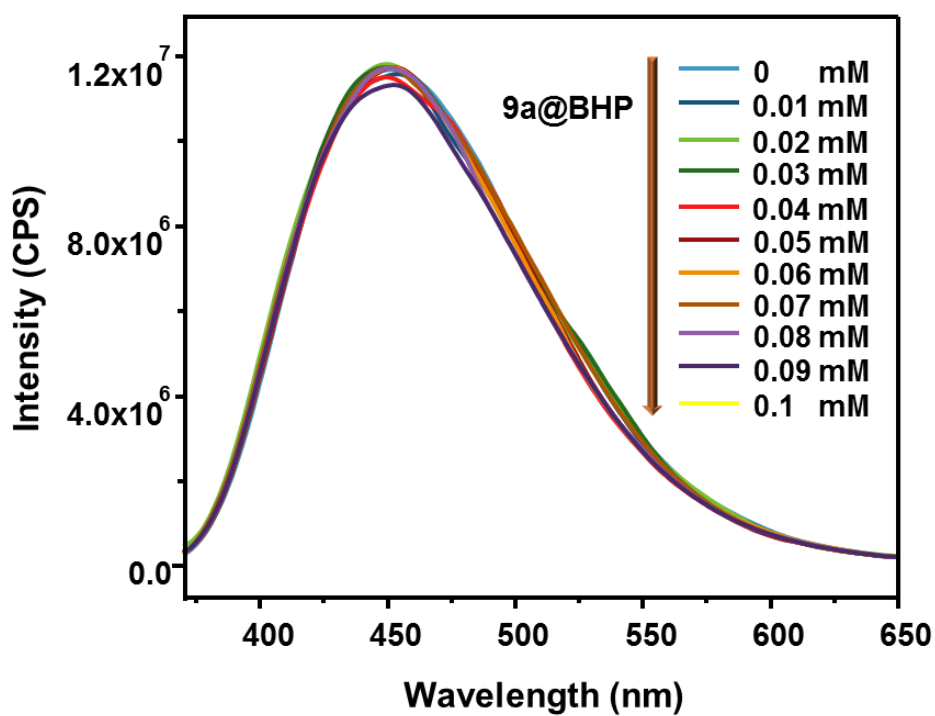

**Fig. S31.** Emission spectra of **9a** upon incremental addition of 2,2-Bis(4-hydroxyphenyl) propane (BHP) solution (1 mM, 200  $\mu$ L).

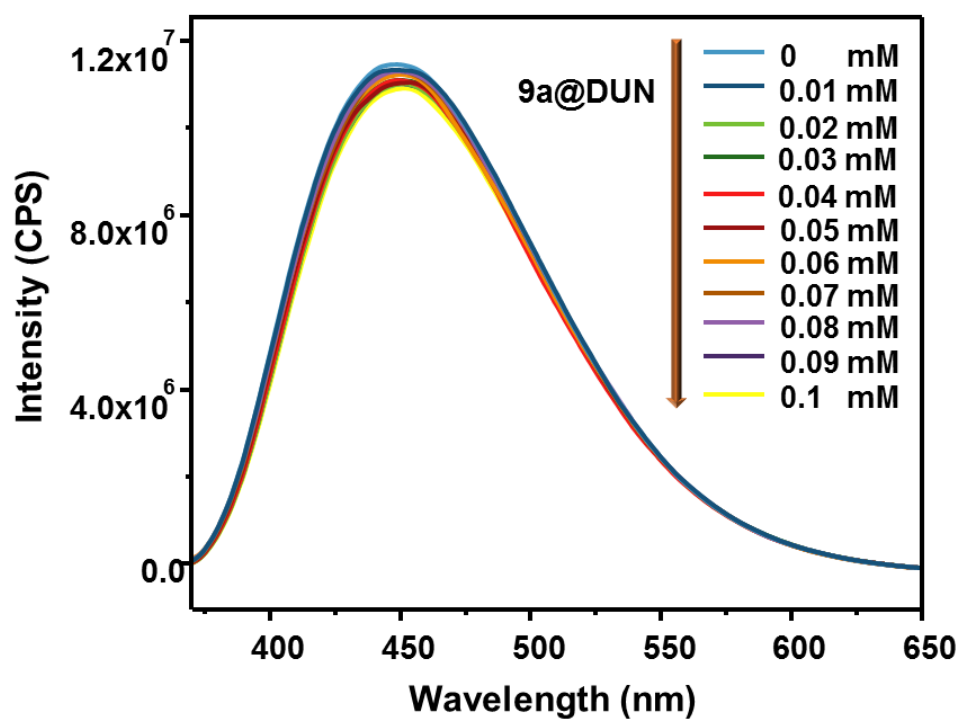

**Fig. S32.** Emission spectra of **9a** upon incremental addition of diuron (DUN) solution (1 mM, 200  $\mu$ L).

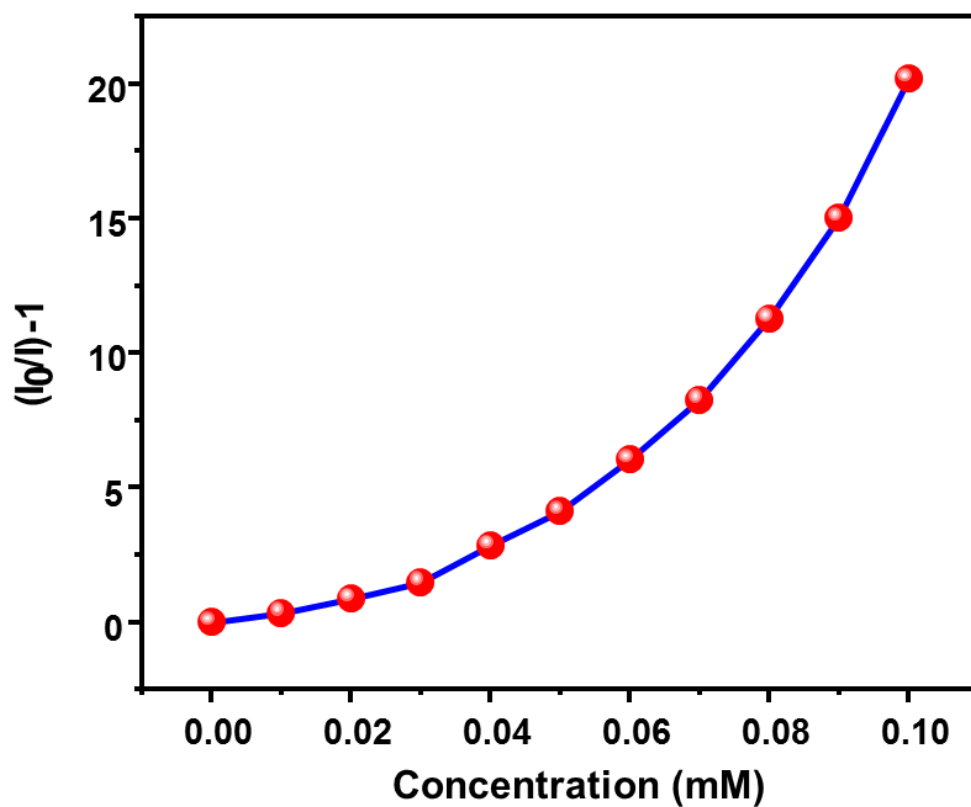

**Fig. S33.** The curvature of the S–V plot for 1 mM DCNA solution (0 to 200  $\mu$ L).

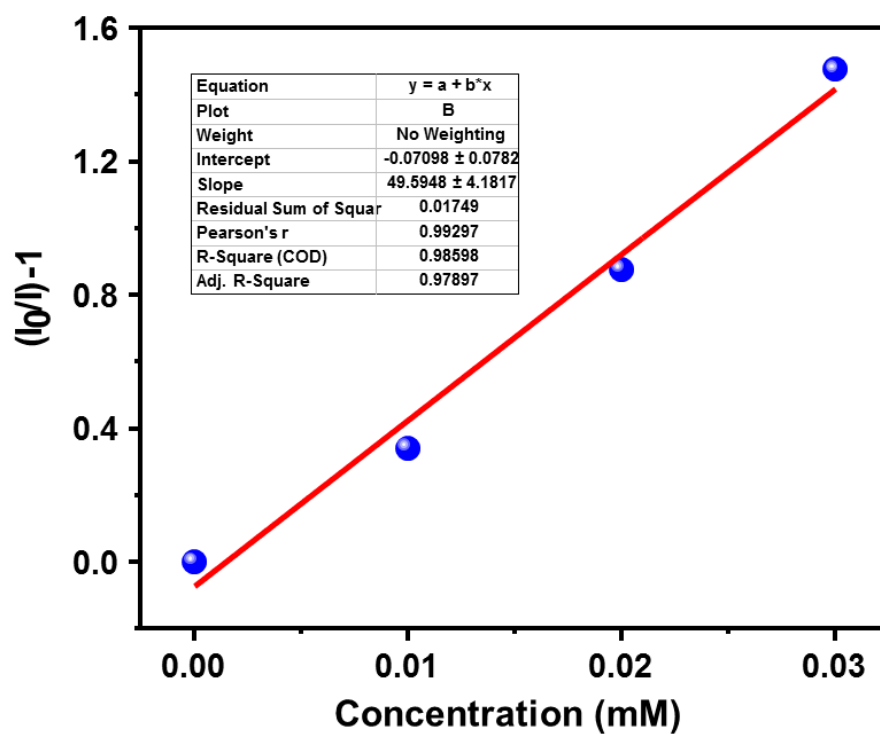

**Fig. S34.** Stern-Volmer (S-V) plot for 1 mM DCNA solution (0 to 200  $\mu$ L). The relative fluorescence intensity ( $I_0/I$ )-1 is linear with DCNA concentration in the range of 0–0.03 mM.

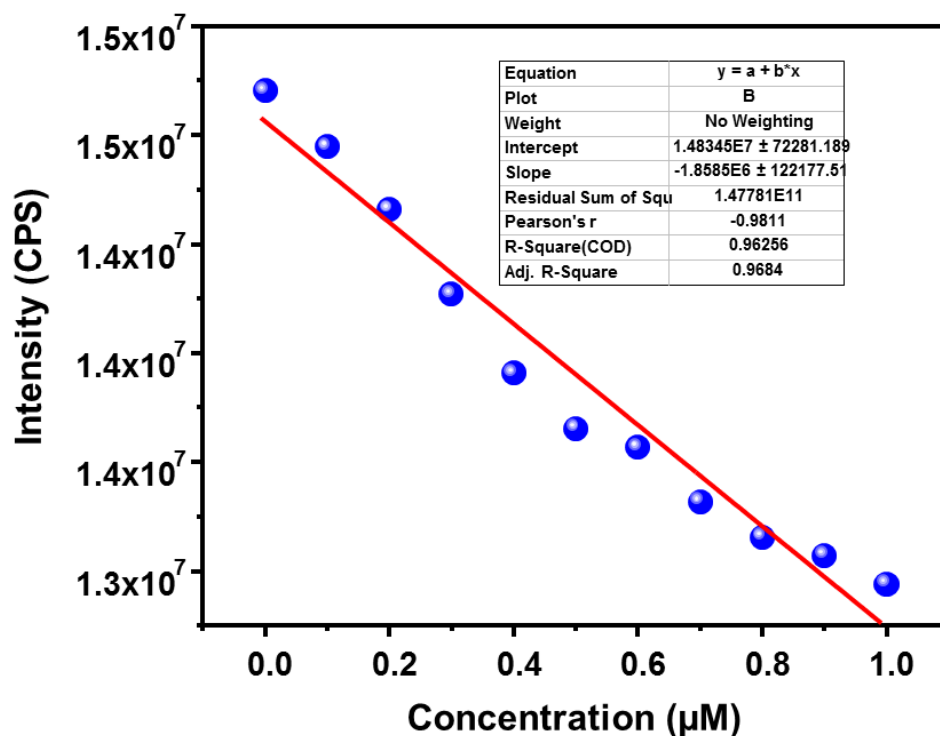

**Fig. S35.** Linear region of fluorescence intensity of **9a** upon addition of DCNA (0 – 200  $\mu$ L, 10  $\mu$ M stock solution).

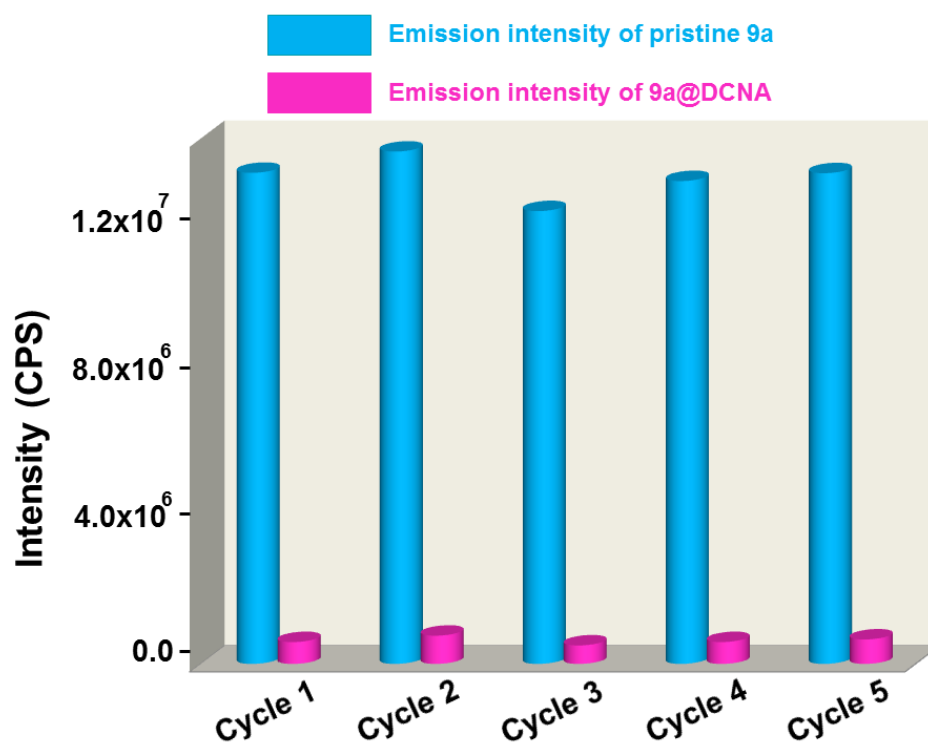

**Fig. S36.** Reproducibility of quenching efficiency of **9a** towards 1 mM DCNA solution up to five sensing-recovery cycles.

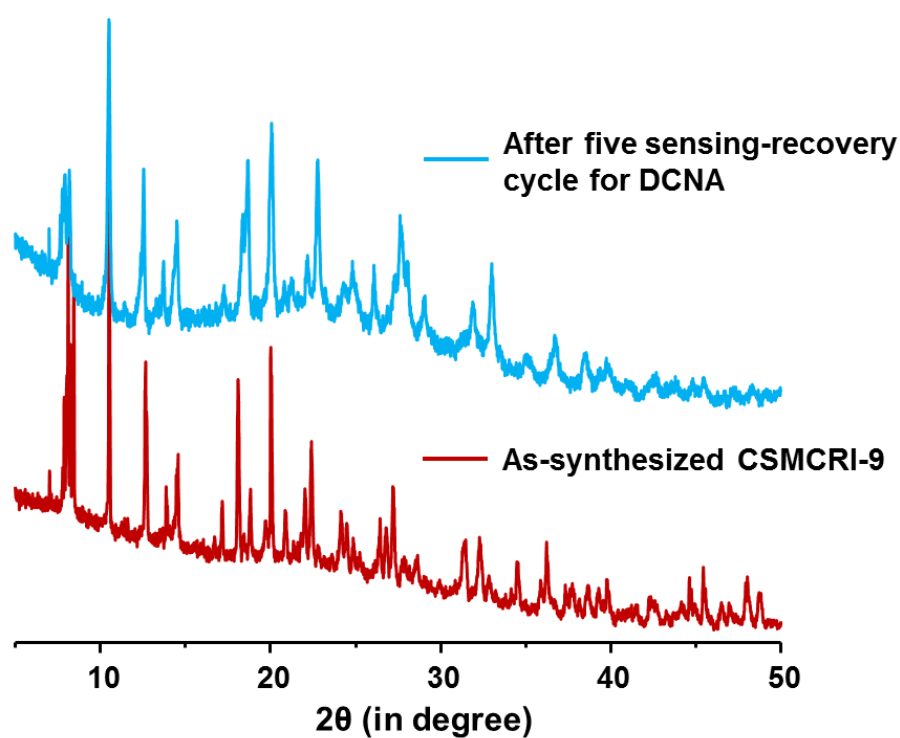

**Fig. S37.** PXRD patterns of **9a** obtained after five sensing-recovery cycles for DCNA (1 mM), revealing that structural integrity of the framework is maintained.

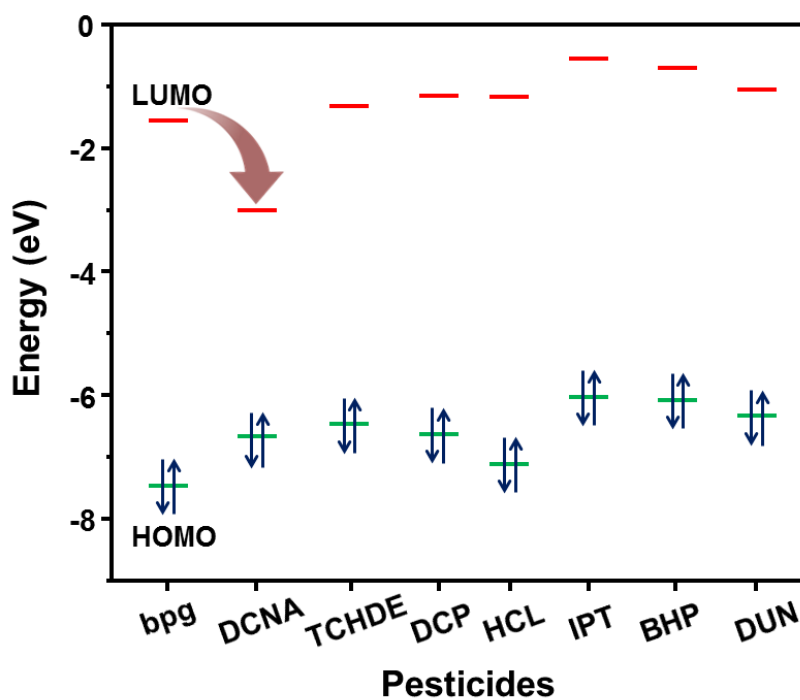

**Fig. S38.** HOMO–LUMO energies for bpg linker along with the studied pesticide molecules.

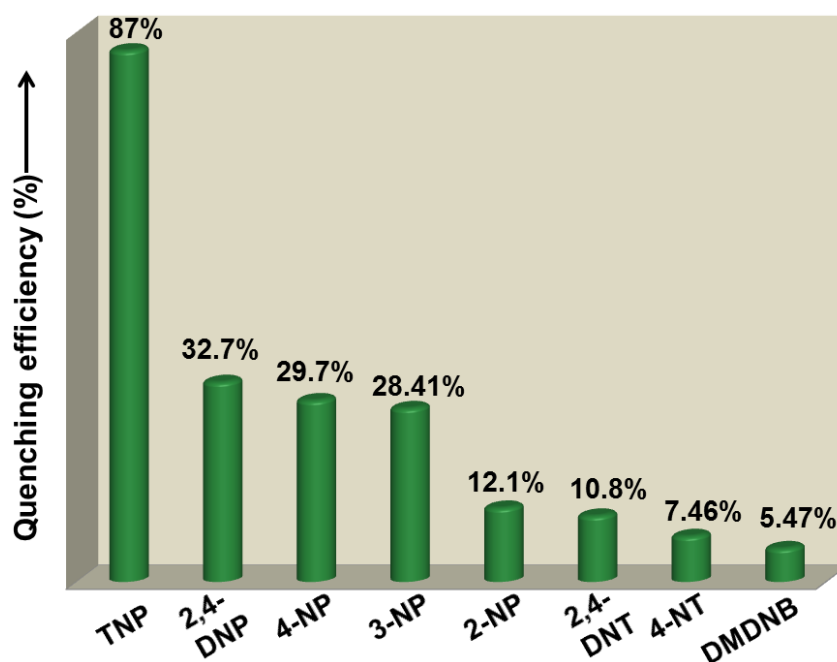

**Fig. S39.** Fluorescence quenching efficiency of **9a** (1 mg/ 2 mL water) towards studied nitroaromatics. Quenching efficiency of **9a** is calculated using equation  $(I_0 - I)/I_0 \times 100\%$ , where  $I_0$  and  $I$  denotes the emission intensities before and after the addition of studied nitro-analytes, respectively.

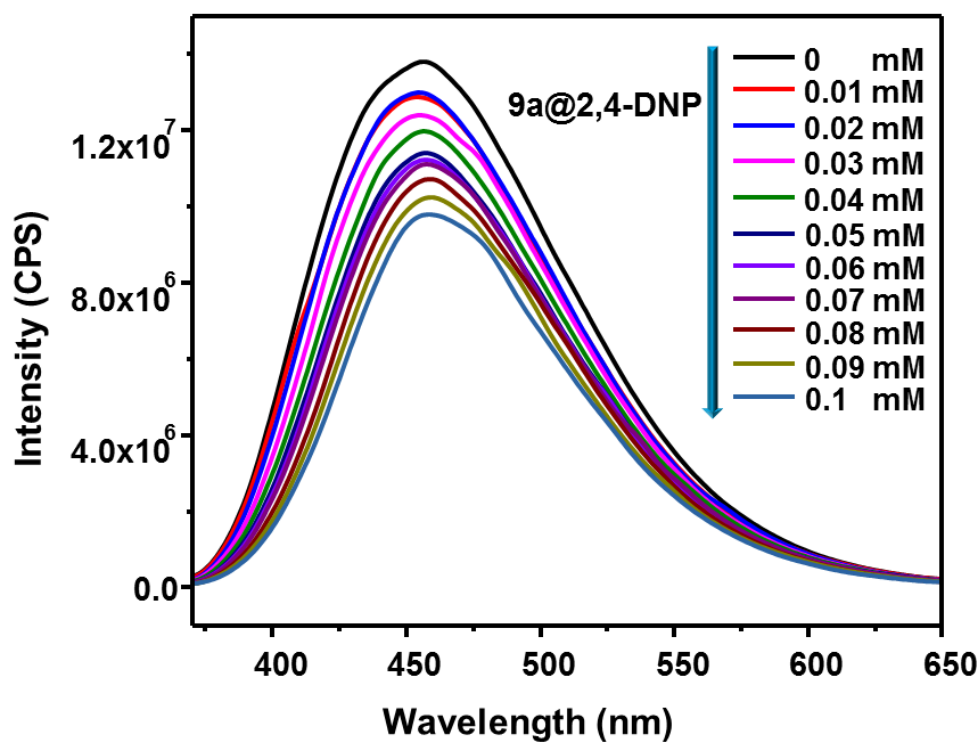

**Fig. S40.** Emission spectra of **9a** upon incremental addition of 2,4-dinitrophenol (2,4-DNP) solution (1 mM, 200  $\mu$ L).

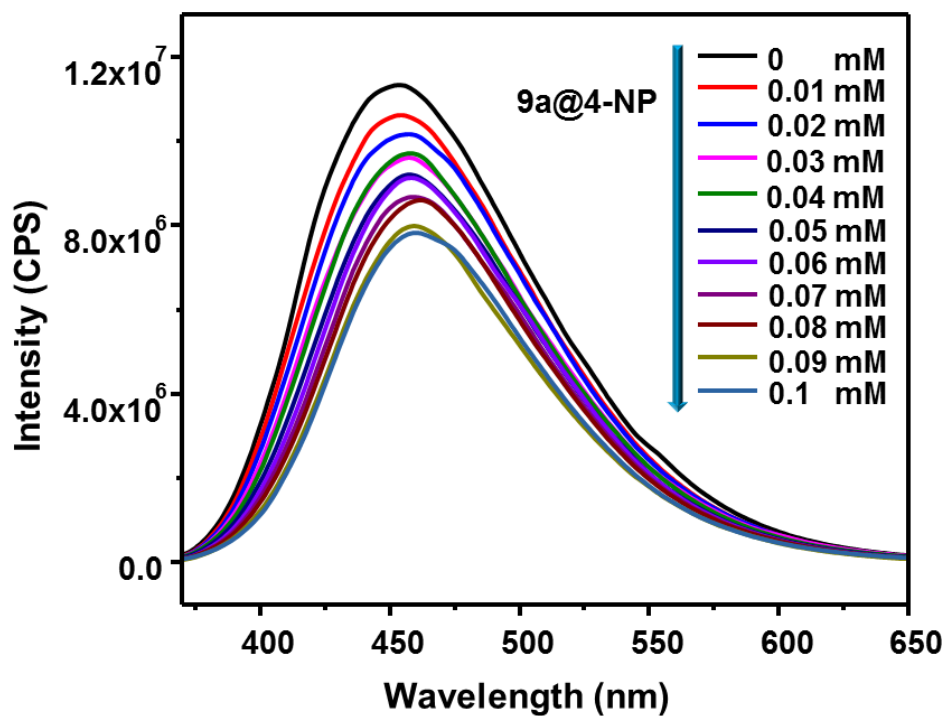

**Fig. S41.** Emission spectra of **9a** upon incremental addition of 4-nitrophenol (4-NP) solution (1 mM, 200  $\mu$ L).

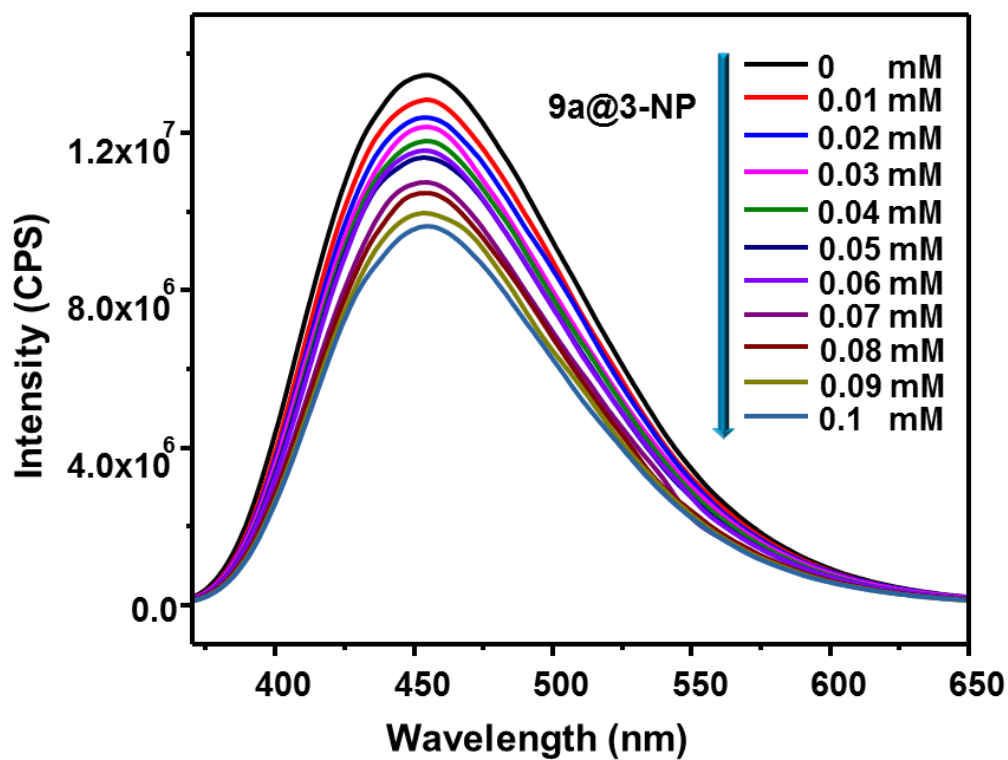

**Fig. S42.** Emission spectra of **9a** upon incremental addition of 3-nitrophenol (3-NP) solution (1 mM, 200  $\mu$ L).

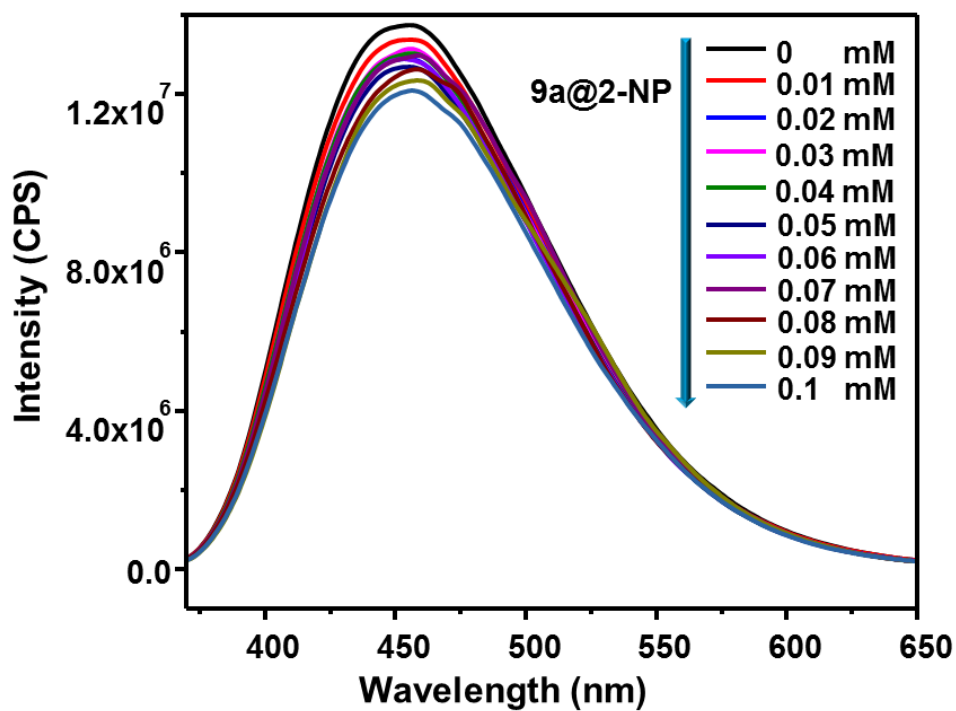

**Fig. S43.** Emission spectra of **9a** upon incremental addition of 2-nitrophenol (2-NP) solution (1 mM, 200  $\mu$ L).

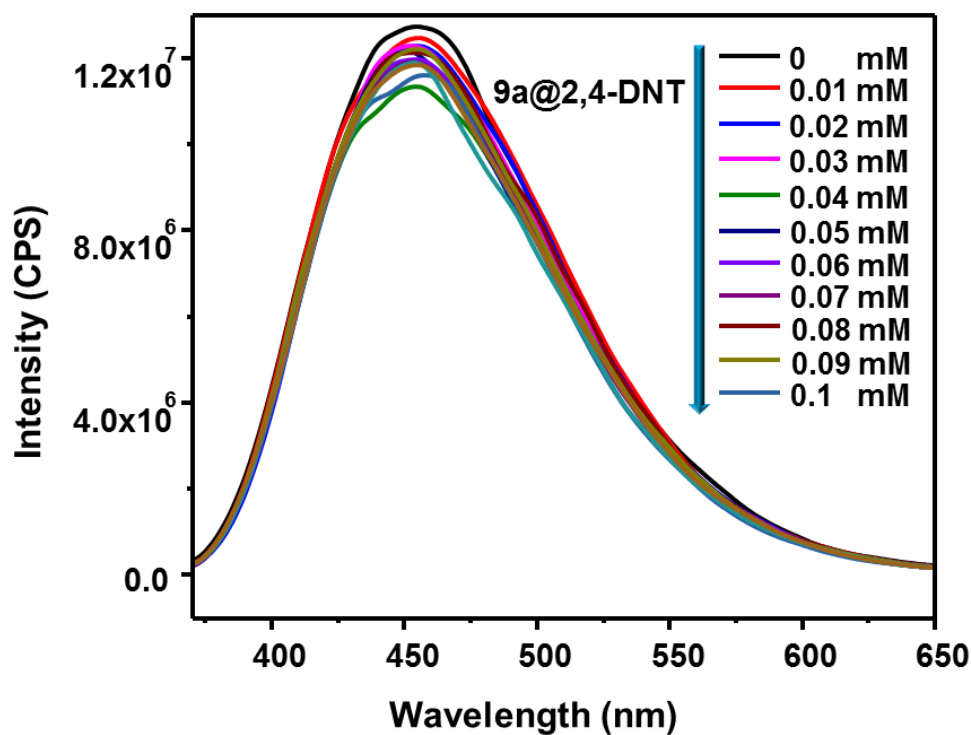

**Fig. S44.** Emission spectra of **9a** upon incremental addition of 2,4-dinitrotoluene (2,4-DNT) solution (1 mM, 200  $\mu$ L).

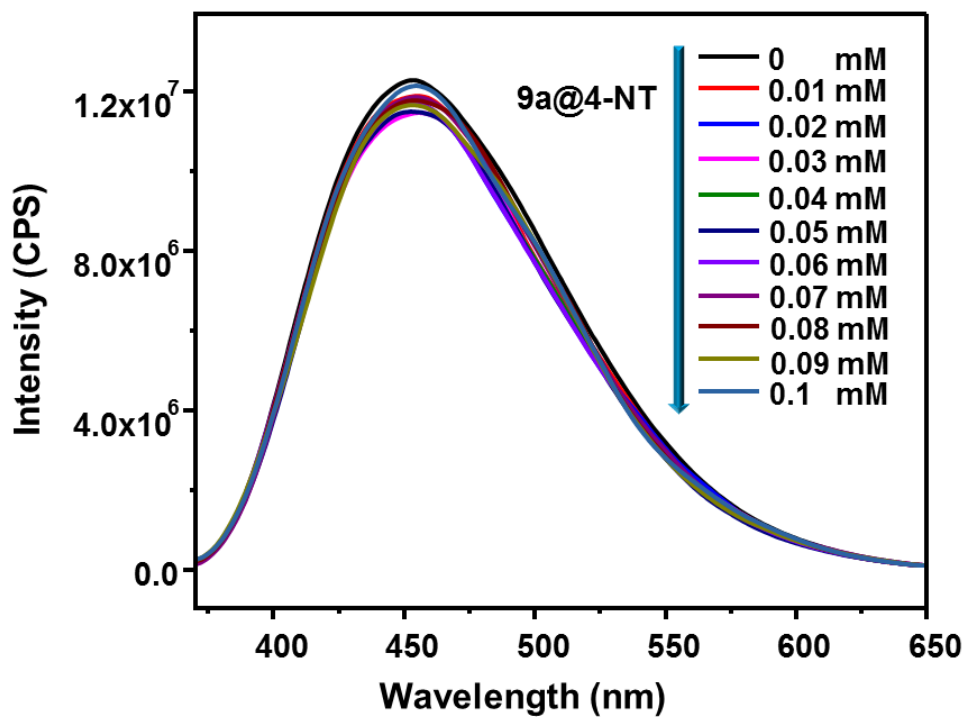

**Fig. S45.** Emission spectra of **9a** upon incremental addition of 4-nitrotoluene (4-NT) solution (1 mM, 200  $\mu$ L).

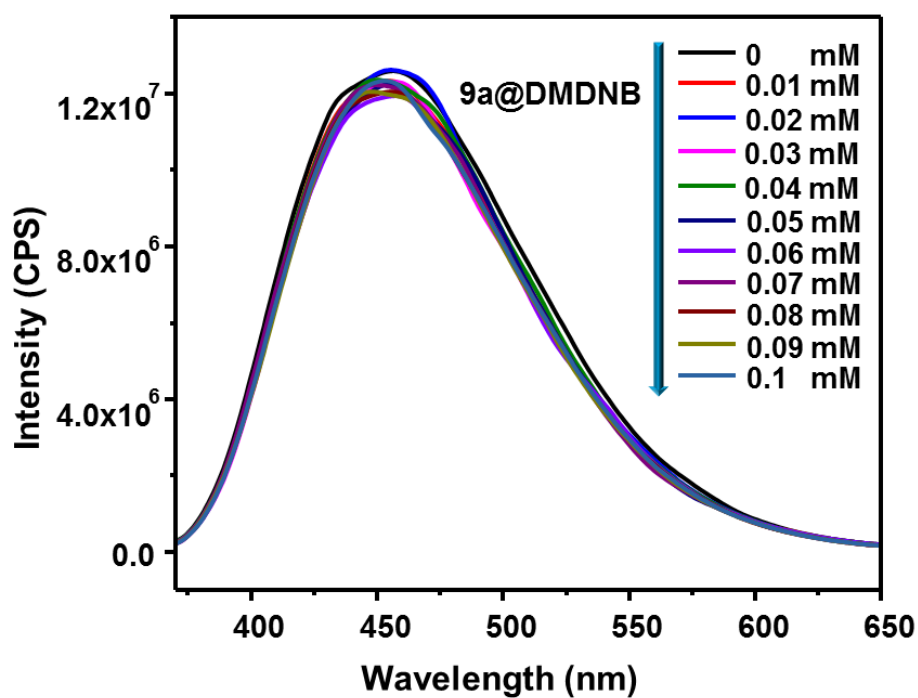

**Fig. S46.** Emission spectra of **9a** upon incremental addition of 2,3-dimethyl-2,3-dinitrobutane (DMDNB) solution (1 mM, 200  $\mu$ L).

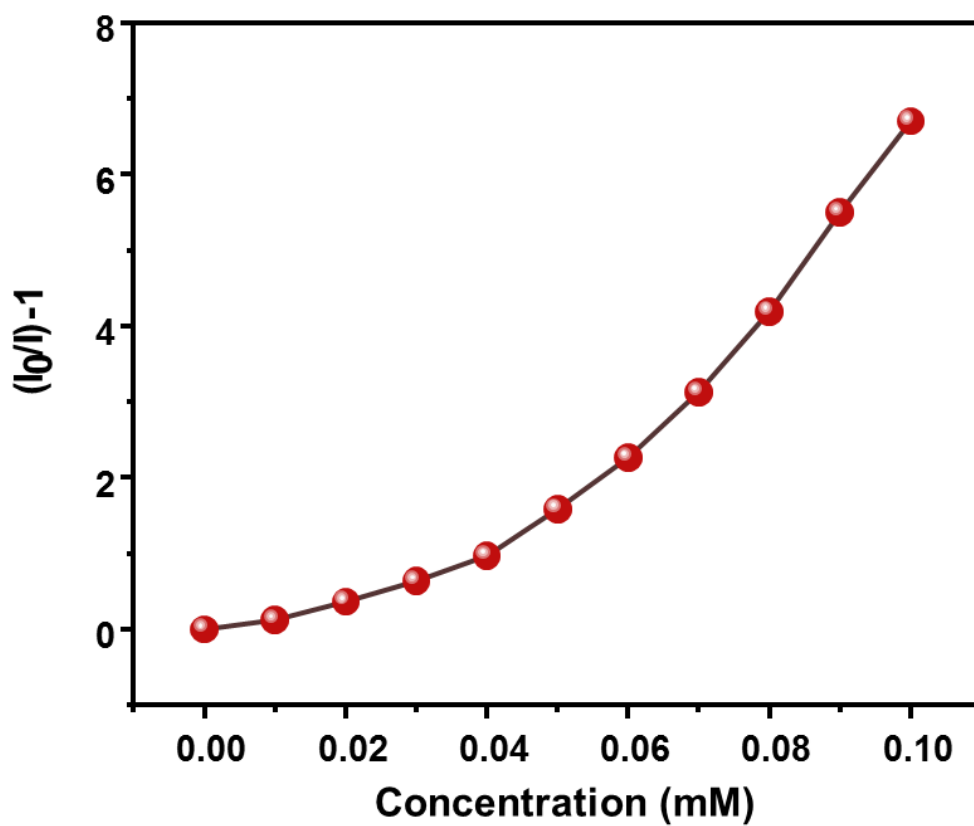

**Fig. S47.** The upward bent of the S-V plot for 1 mM TNP solution (0 to 200  $\mu$ L).

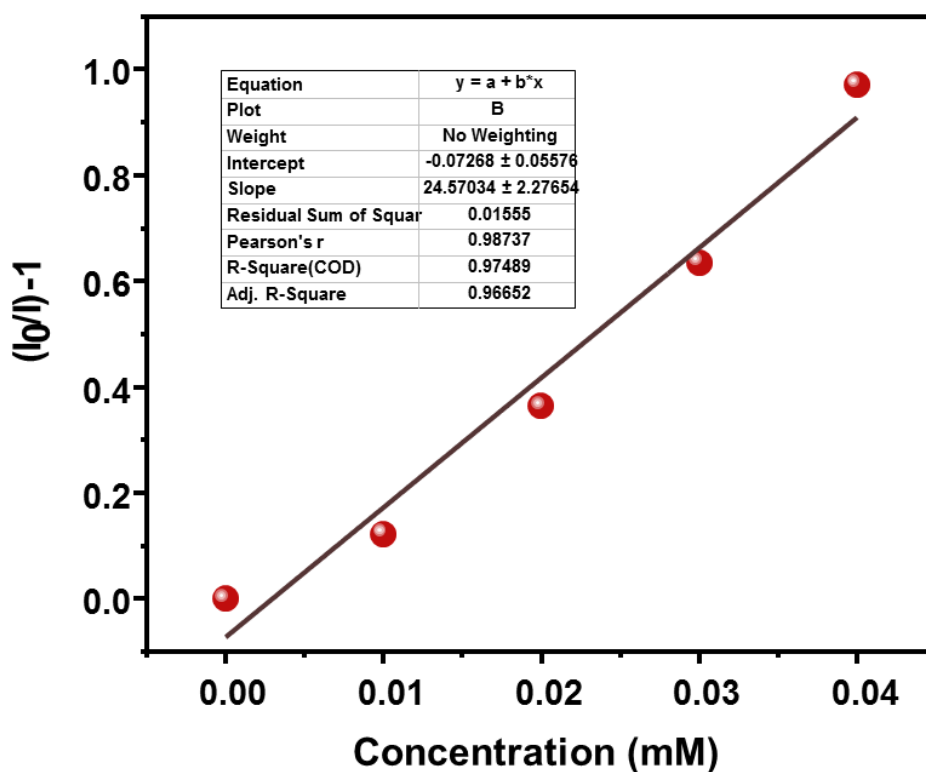

**Fig. S48.** Stern-Volmer (S-V) plot for 1 mM TNP solution (0 to 200  $\mu$ L). The relative fluorescence intensity  $(I_0/I)-1$  is linear with TNP concentration in the range of 0–0.04 mM.

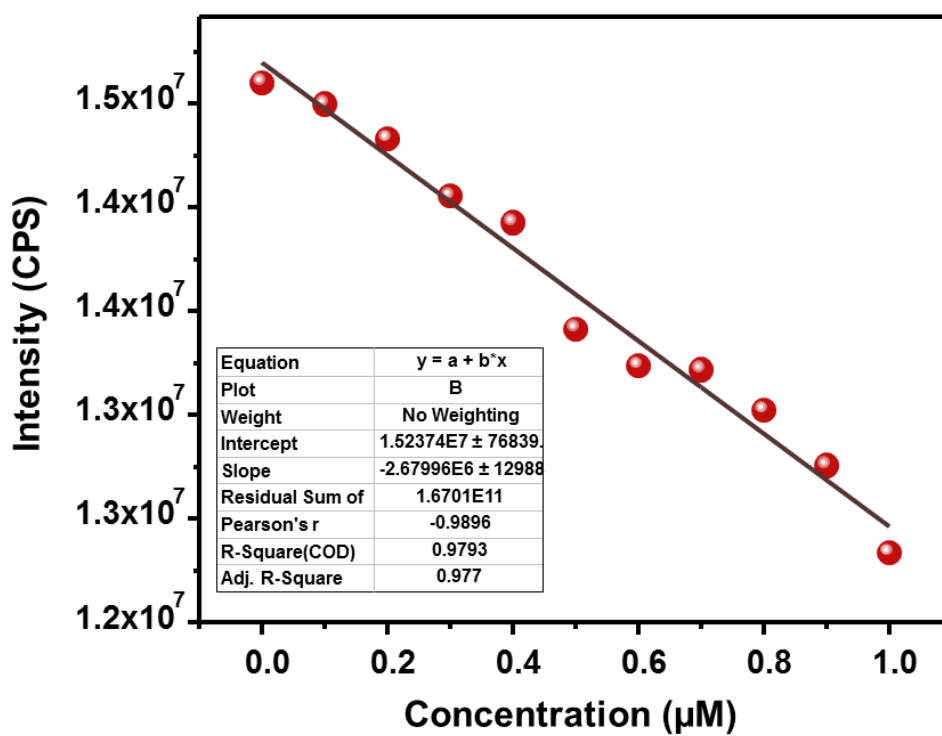

**Fig. S49.** Linear region of fluorescence intensity of **9a** upon addition of TNP (0 – 200  $\mu$ L, 10  $\mu$ M stock solution).

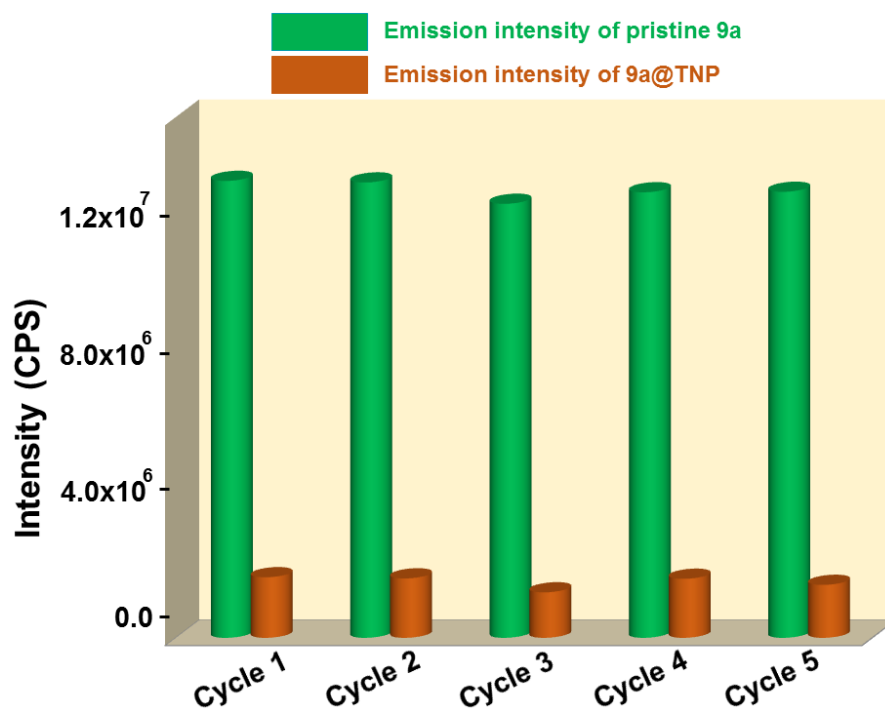

**Fig. S50.** Reproducibility of quenching efficiency of **9a** towards 1 mM TNP solution up to five sensing-recovery cycles.

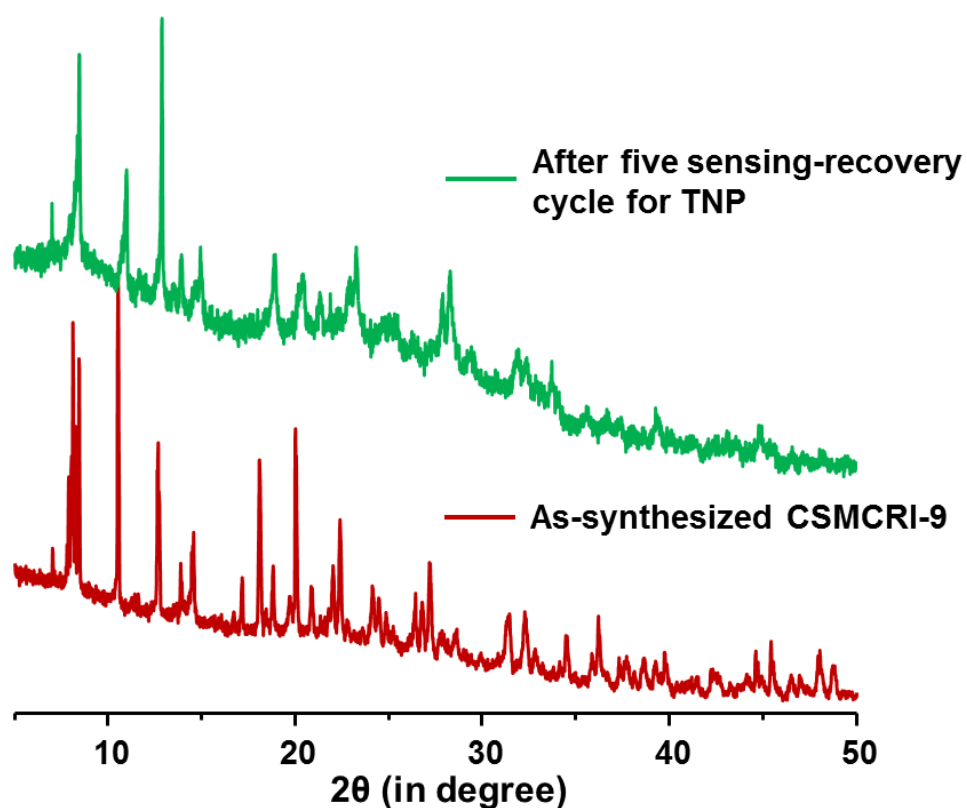

**Fig. S51.** PXRD patterns of **9a** obtained after five sensing-recovery cycles for TNP (1 mM), revealing that structural integrity of the framework is maintained.

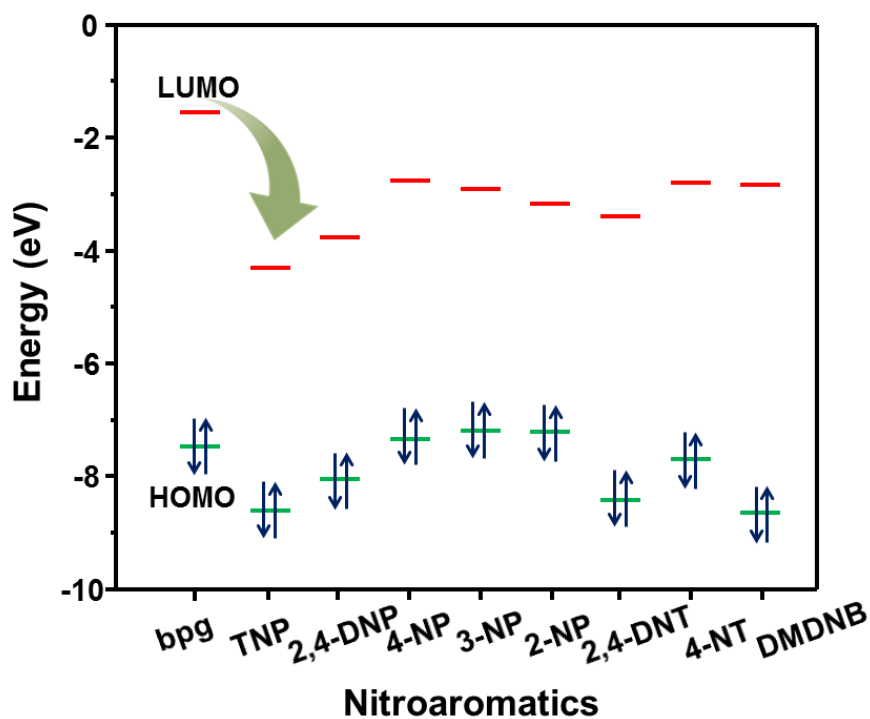

**Fig. S52.** HOMO–LUMO energies for bpg linker along with the studied nitroaromatic molecules.

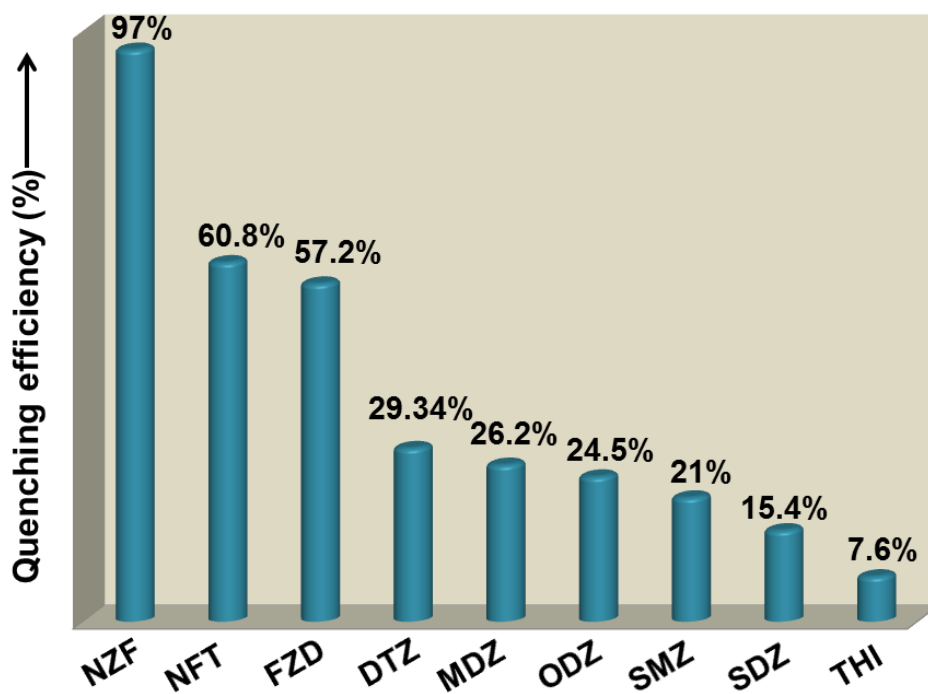

**Fig. S53.** Fluorescence quenching efficiency of **9a** (1 mg/ 2 mL water) towards studied antibiotics. Quenching efficiency of **9a** is calculated using equation  $(I_0 - I)/I_0 \times 100\%$ , where  $I_0$  and  $I$  denotes the emission intensities before and after the addition of studied antibiotics, respectively.

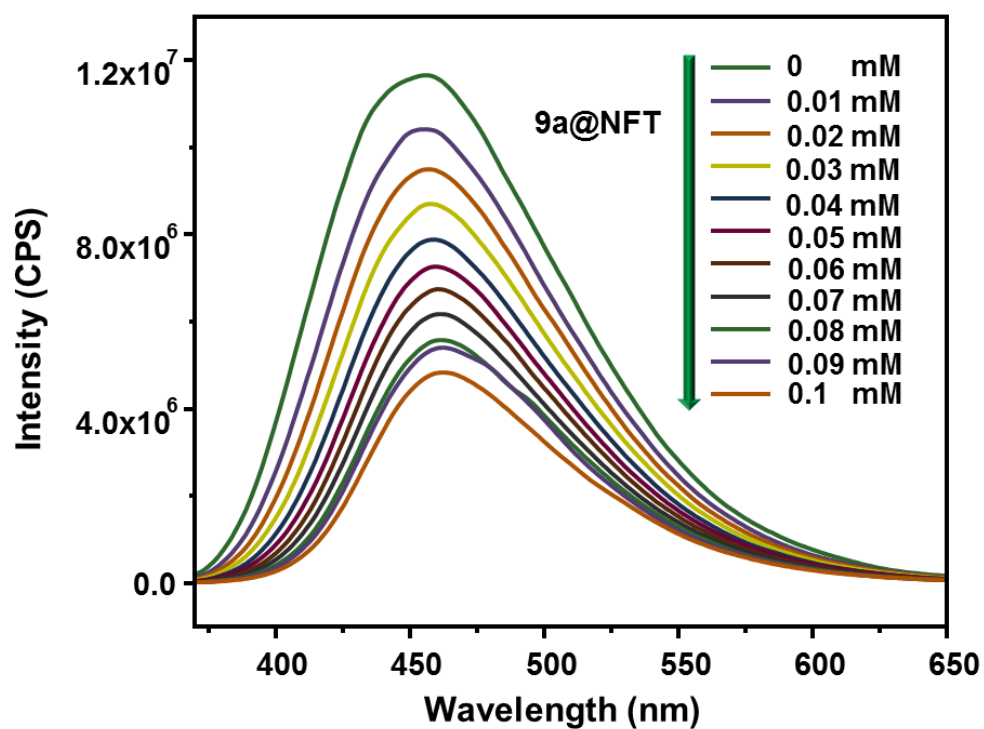

**Fig. S54.** Emission spectra of **9a** upon incremental addition of nitrofurantoin (NFT) solution (1 mM, 200  $\mu$ L).

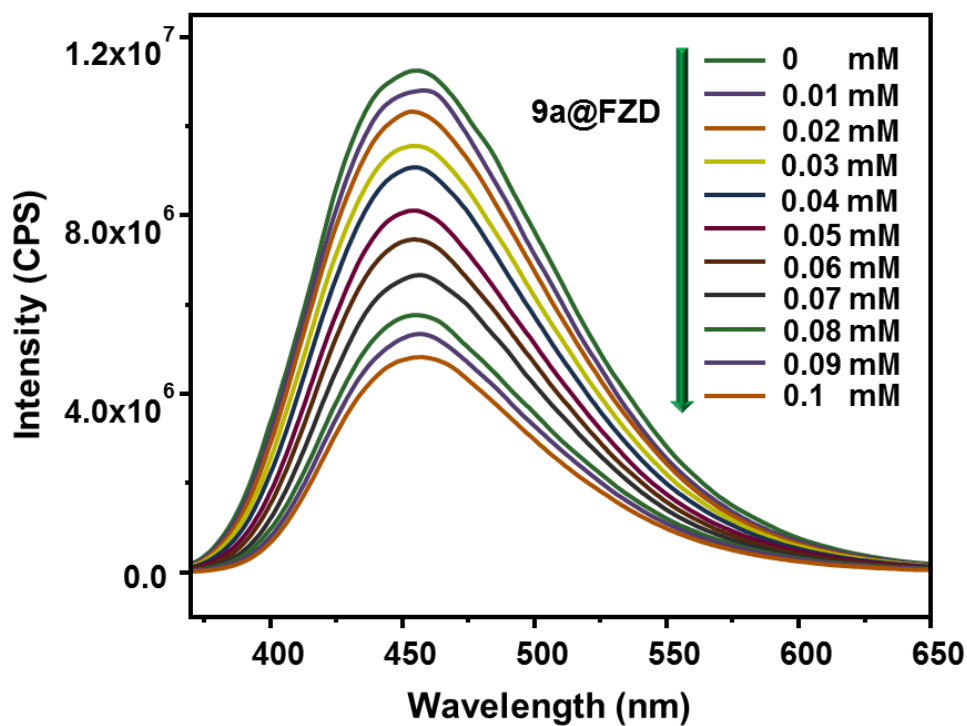

**Fig. S55.** Emission spectra of **9a** upon incremental addition of furazolidone (FZD) solution (1 mM, 200  $\mu$ L).

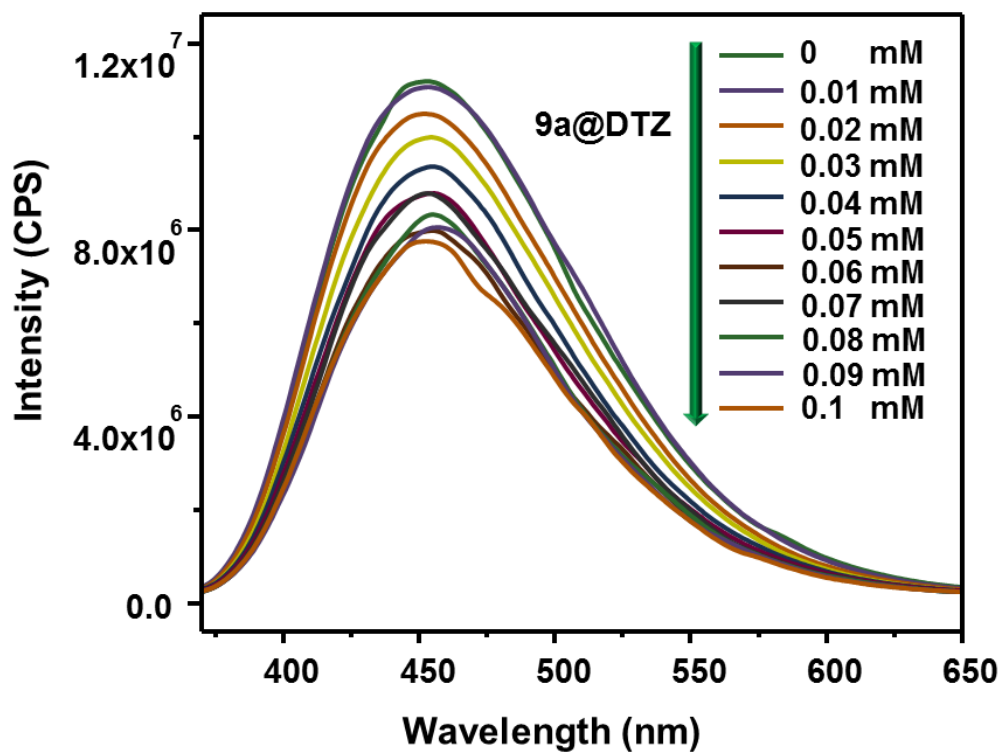

**Fig. S56.** Emission spectra of **9a** upon incremental addition of dimetridazole (DTZ) solution (1 mM, 200  $\mu$ L).

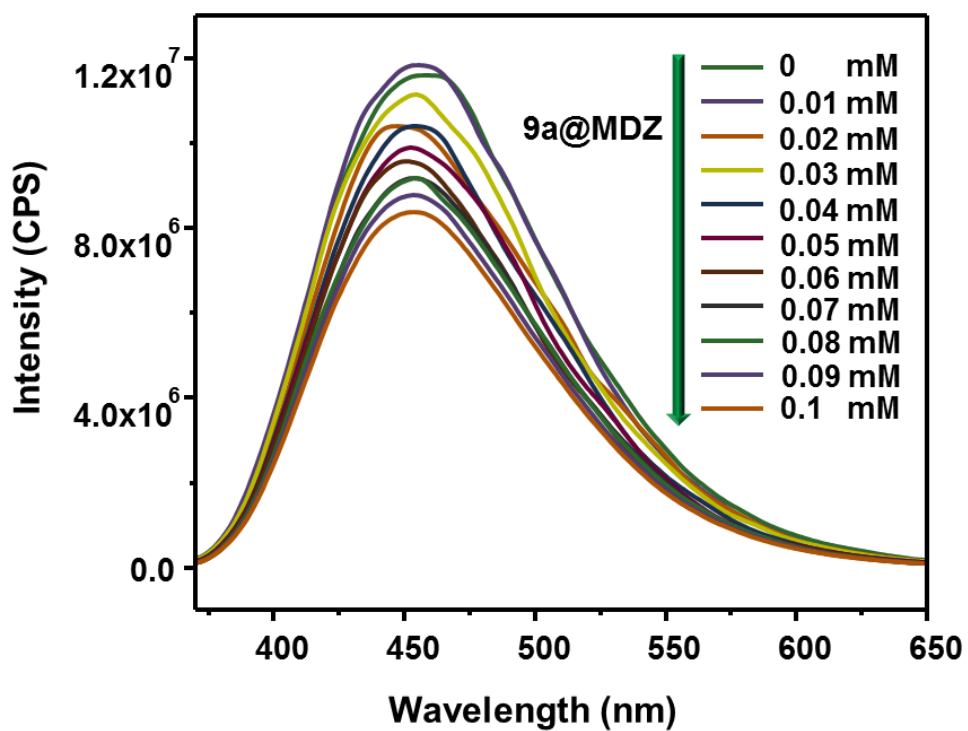

**Fig. S57.** Emission spectra of **9a** upon incremental addition of metronidazole (MDZ) solution (1 mM, 200  $\mu$ L).

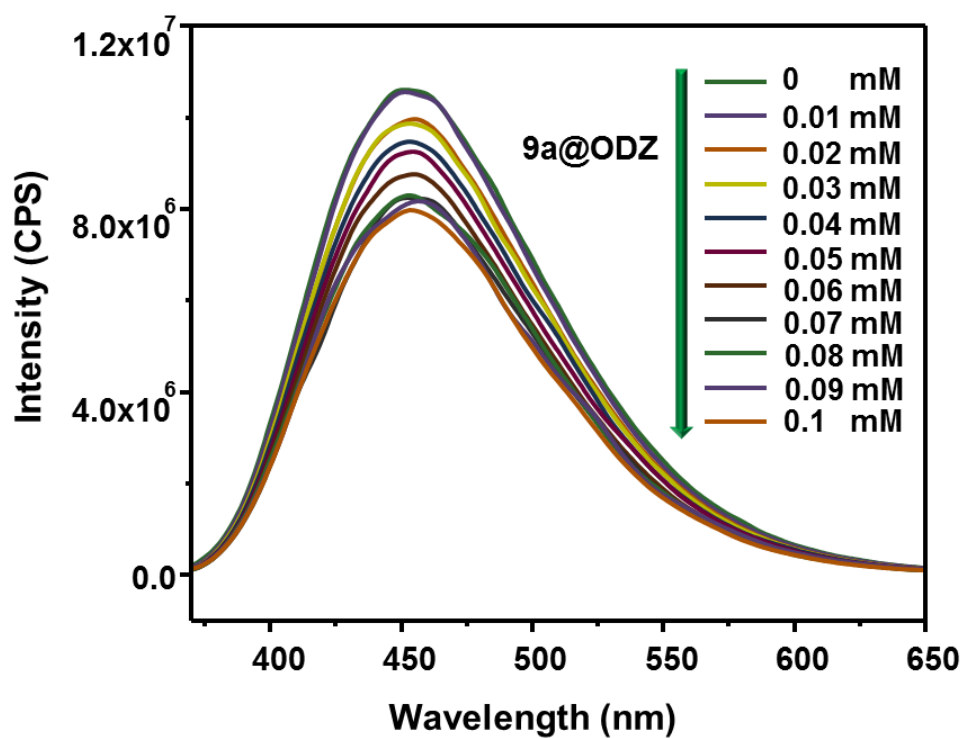

**Fig. S58.** Emission spectra of **9a** upon incremental addition of ornidazole (ODZ) solution (1 mM, 200  $\mu$ L).

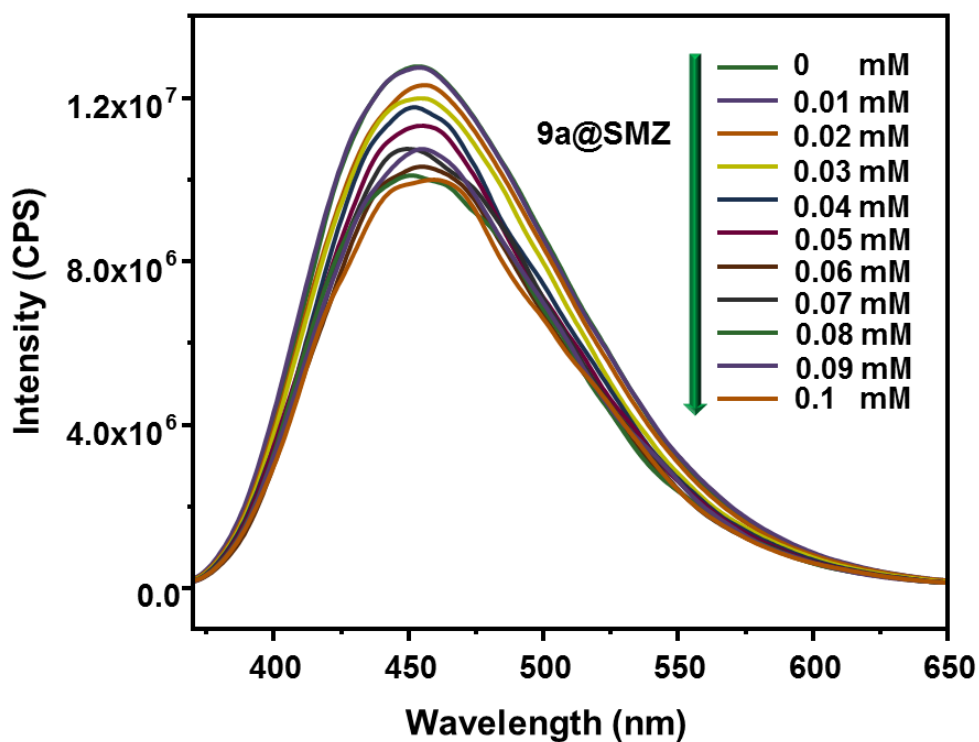

**Fig. S59.** Emission spectra of **9a** upon incremental addition of sulfamethazine (SMZ) solution (1 mM, 200  $\mu$ L).

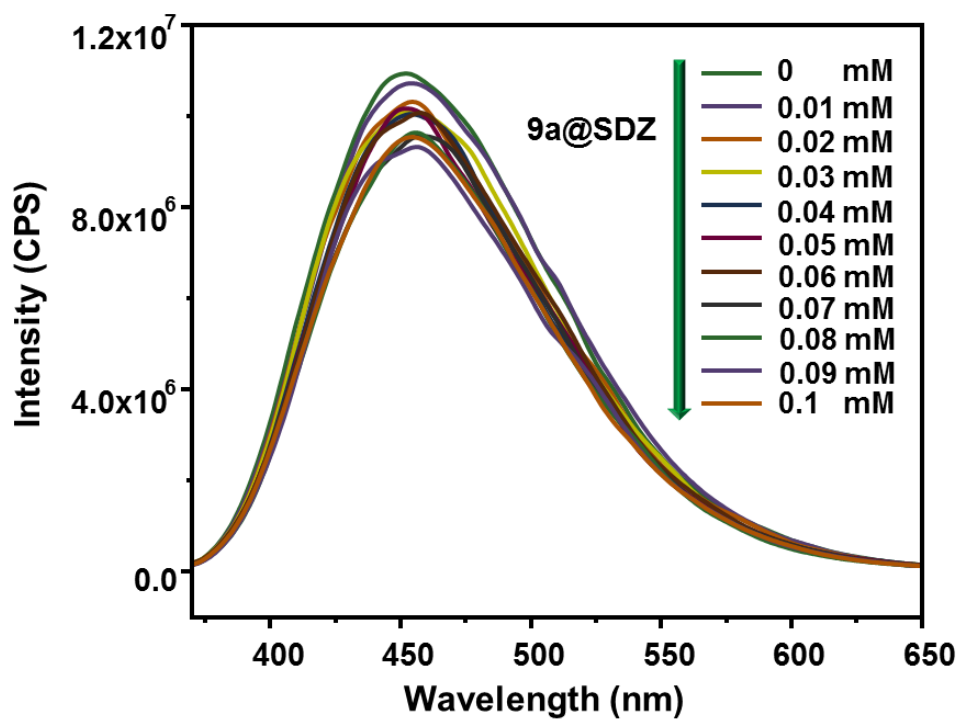

**Fig. S60.** Emission spectra of **9a** upon incremental addition of sulfadiazine (SDZ) solution (1 mM, 200  $\mu$ L).

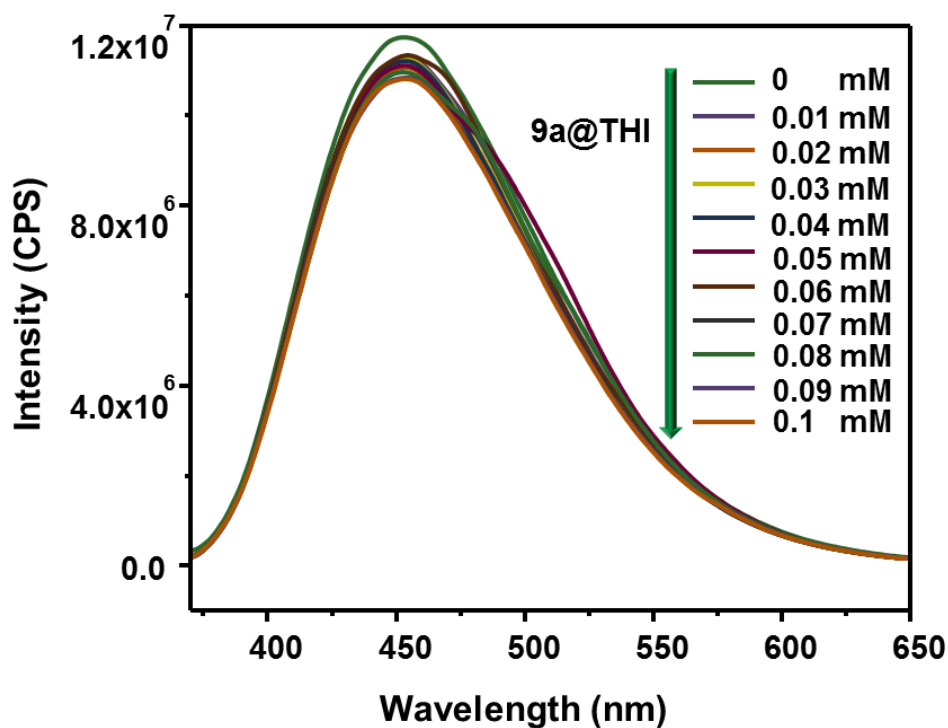

**Fig. S61.** Emission spectra of **9a** upon incremental addition of thiamphenicol (THI) solution (1 mM, 200  $\mu$ L).

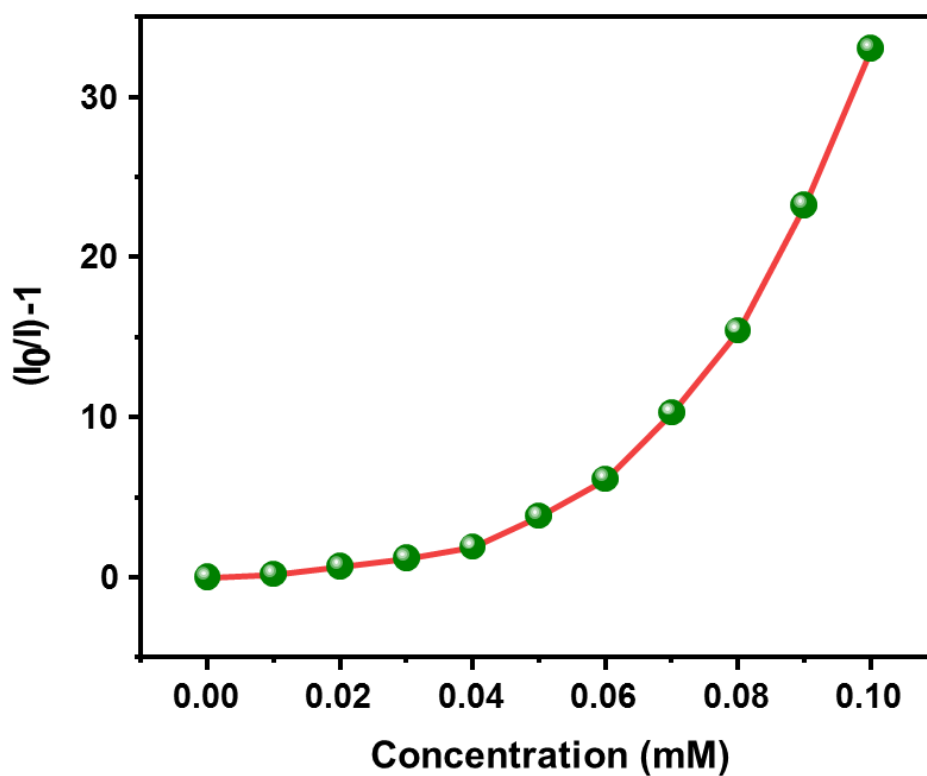

**Fig. S62.** The upward curvature of the S–V plot for 1 mM NZF solution (0 to 200  $\mu$ L).

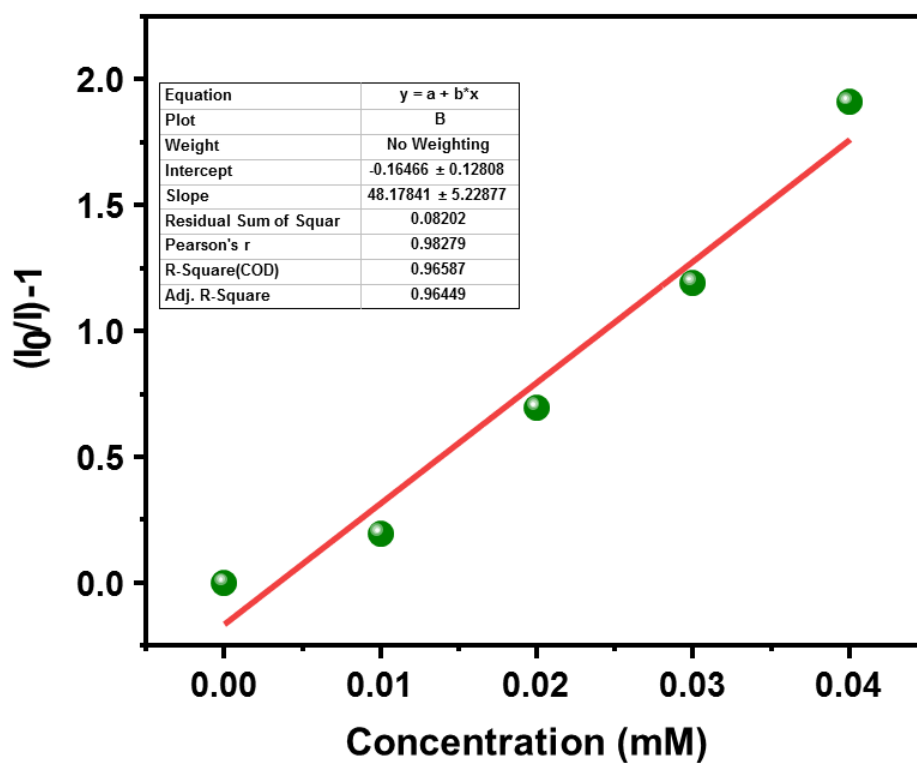

**Fig. S63.** Stern-Volmer (S-V) plot for 1 mM NZF solution (0 to 200  $\mu$ L). The relative fluorescence intensity  $(I_0/I)^{-1}$  is linear with NZF concentration in the range of 0–0.04 mM.

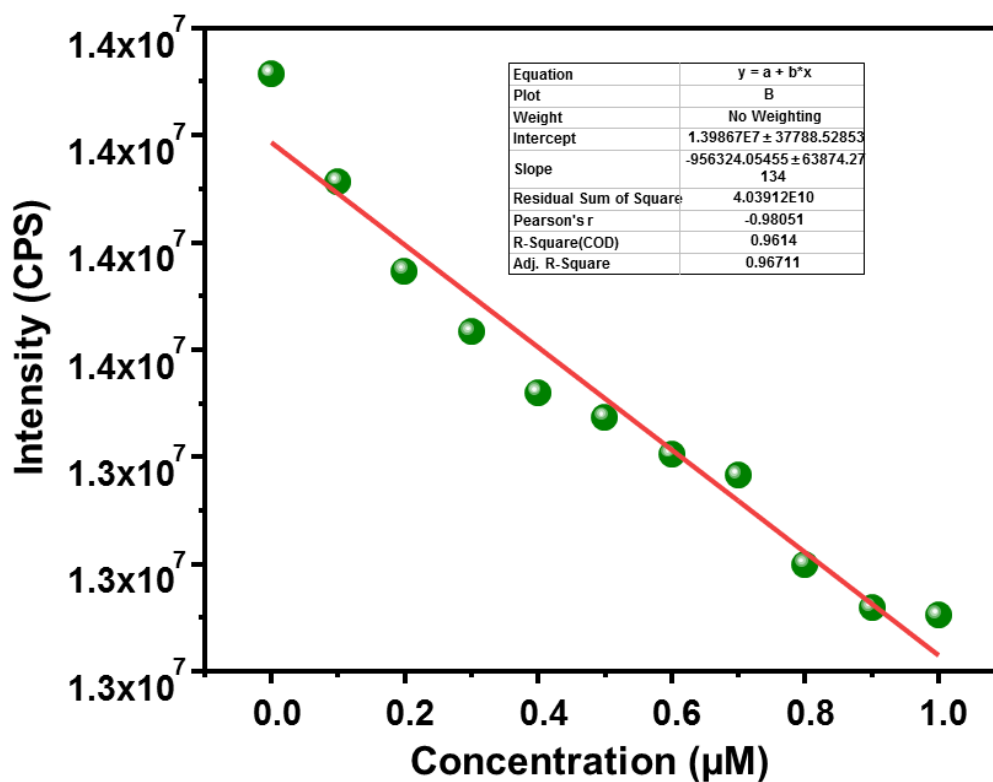

**Fig. S64.** Linear region of fluorescence intensity of **9a** upon addition of NZF (0 – 200  $\mu\text{L}$ , 10  $\mu\text{M}$  stock solution).

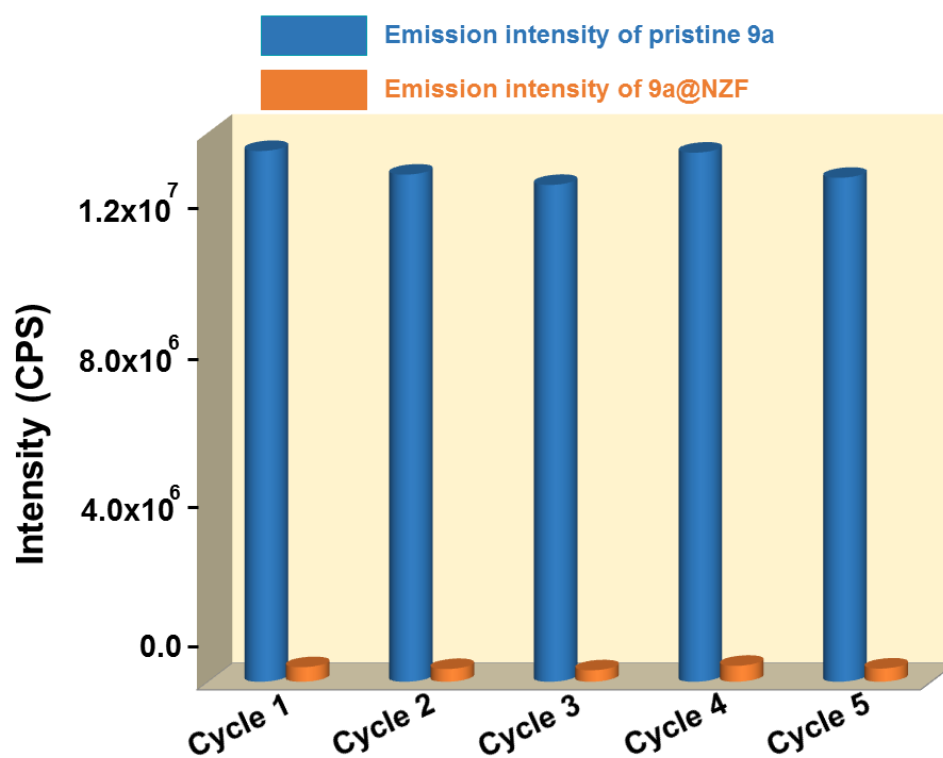

**Fig. S65.** Reproducibility of quenching efficiency of **9a** towards 1 mM NZF solution up to five sensing-recovery cycles.

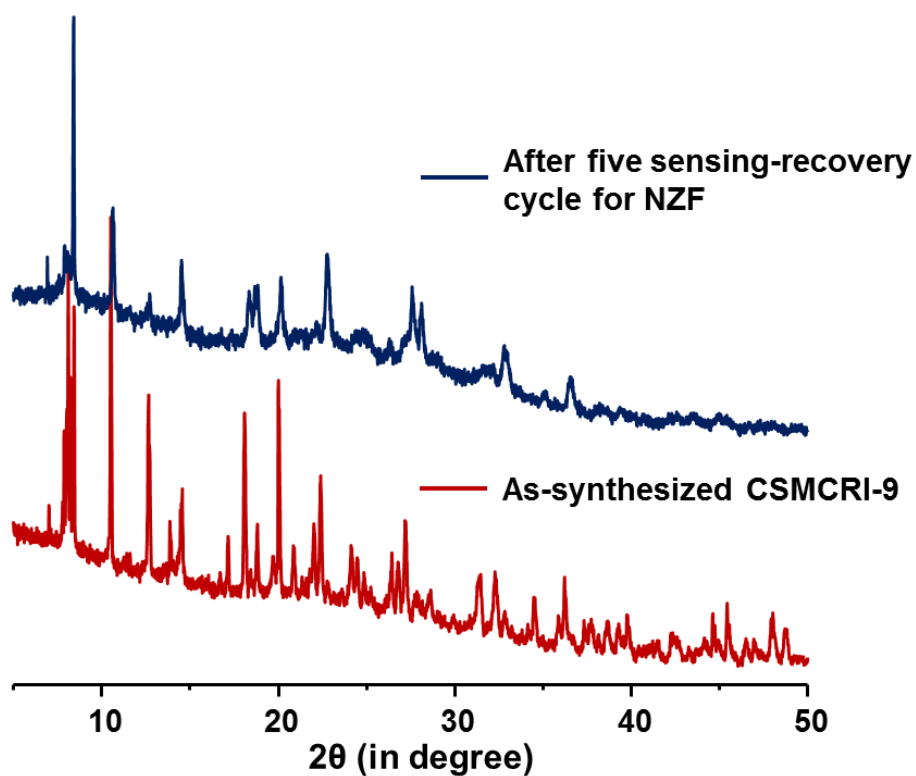

**Fig. S66.** PXRD patterns of **9a** obtained after five sensing-recovery cycles for NZF (1 mM), revealing that structural integrity of the framework is maintained.

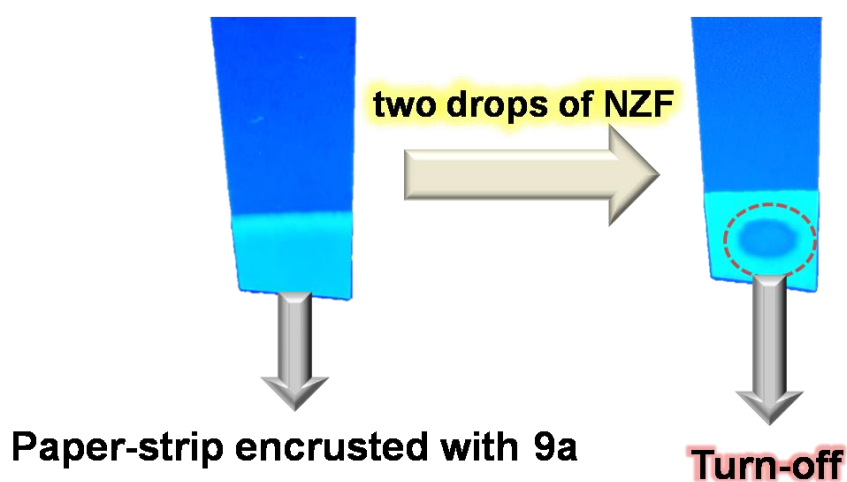

**Fig. S67.** Photographs of paper-strips encrusted with **9a** and after addition of NZF solution, under 365 nm UV-light.

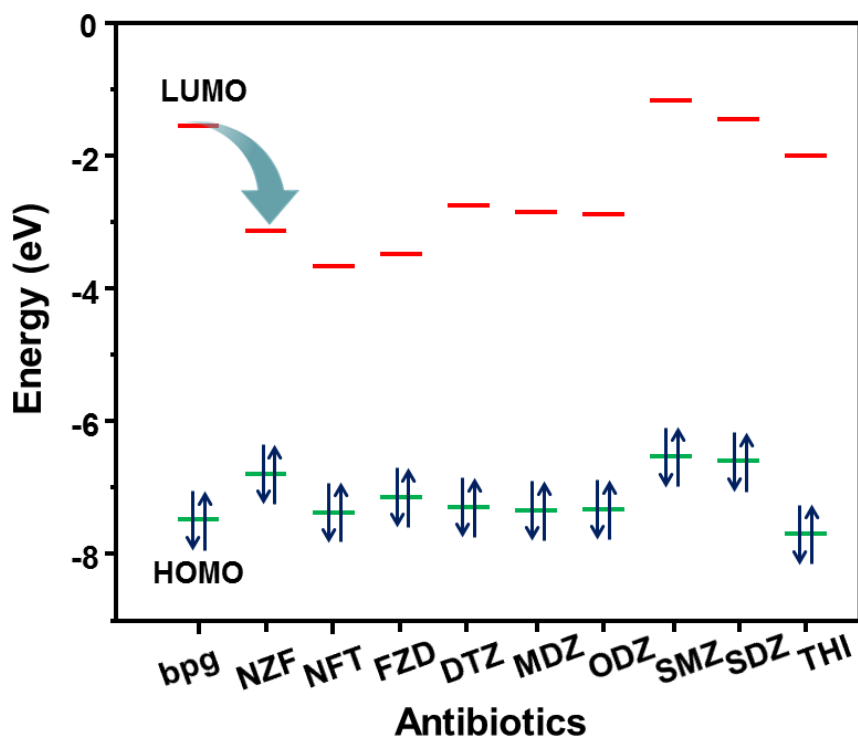

**Fig. S68.** HOMO–LUMO energies for bpg linker along with the studied antibiotic molecules.

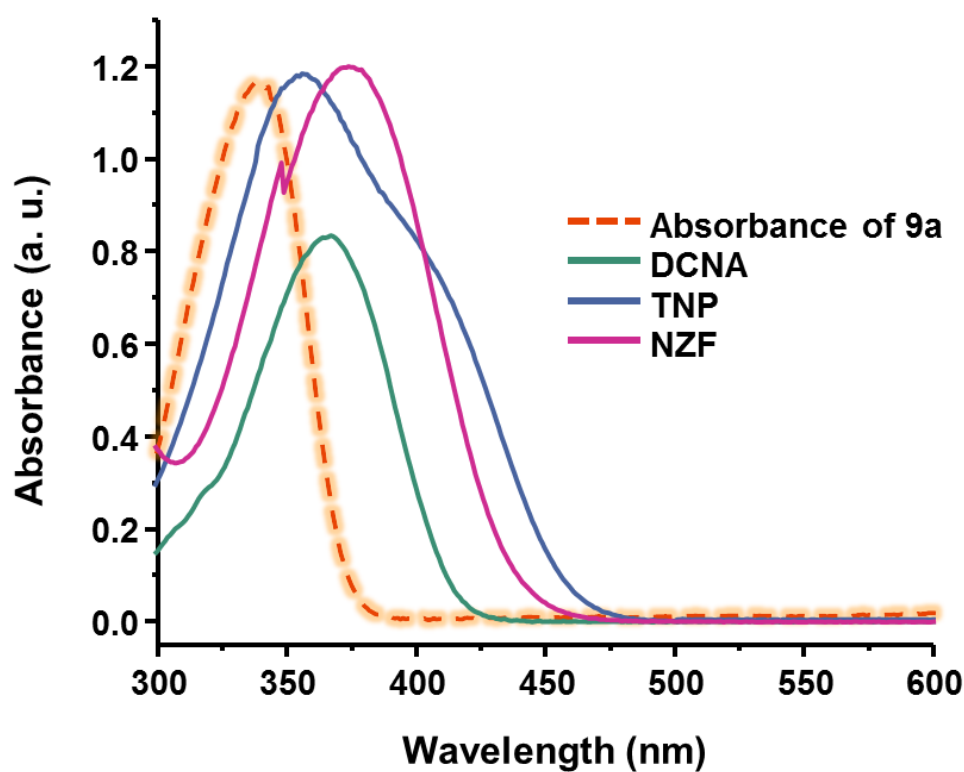

**Fig. S69.** Spectral overlap of the absorption spectrum of **9a** with the absorption spectra of the DCNA, TNP and NZF; revealing competitive energy absorption mechanism in luminescence quenching.

**Table S1.** Crystal data and refinement parameters for **CSMCRI-9**

|                                             |                                                                                   |
|---------------------------------------------|-----------------------------------------------------------------------------------|
| Identification code                         | <b>CSMCRI-9</b>                                                                   |
| Empirical formula                           | C <sub>27</sub> H <sub>18</sub> Cd <sub>1.5</sub> N <sub>2</sub> O <sub>7.5</sub> |
| Formula weight                              | 659.07                                                                            |
| Temperature/K                               | 300.15                                                                            |
| Crystal system                              | monoclinic                                                                        |
| Space group                                 | C2/c                                                                              |
| a/Å                                         | 13.1243(12)                                                                       |
| b/Å                                         | 25.790(2)                                                                         |
| c/Å                                         | 20.1869(18)                                                                       |
| α/°                                         | 90                                                                                |
| β/°                                         | 106.870(3)                                                                        |
| γ/°                                         | 90                                                                                |
| Volume/Å <sup>3</sup>                       | 6538.7(10)                                                                        |
| Z                                           | 8                                                                                 |
| ρ <sub>calc</sub> /cm <sup>3</sup>          | 1.3389                                                                            |
| μ/mm <sup>-1</sup>                          | 1.025                                                                             |
| F(000)                                      | 2599.6                                                                            |
| Crystal size/mm <sup>3</sup>                | 0.34 × 0.158 × 0.12                                                               |
| Radiation                                   | Mo Kα (λ = 0.71073)                                                               |
| 2θ range for data collection/°              | 4.62 to 66.48                                                                     |
| Index ranges                                | -20 ≤ h ≤ 20, -39 ≤ k ≤ 39, -30 ≤ l ≤ 31                                          |
| Reflections collected                       | 65349                                                                             |
| Independent reflections                     | 12443 [R <sub>int</sub> = 0.0617, R <sub>sigma</sub> = 0.0483]                    |
| Data/restraints/parameters                  | 12443/0/345                                                                       |
| Goodness-of-fit on F <sup>2</sup>           | 1.061                                                                             |
| Final R indexes [I>=2σ(I)]                  | R <sub>1</sub> = 0.0505, wR <sub>2</sub> = 0.1440                                 |
| Final R indexes [all data]                  | R <sub>1</sub> = 0.0799, wR <sub>2</sub> = 0.1753                                 |
| Largest diff. peak/hole / e Å <sup>-3</sup> | 1.77/-1.35                                                                        |

Alert level A

PLAT410\_ALERT\_2\_A Short Intra H...H Contact H010 ..H010 . 1.62 Ang. 2-x,y,3/2-z = 2\_756  
Check

Alert level B

PLAT213\_ALERT\_2\_B Atom C60 has ADP max/min Ratio ..... 4.2 prolat  
 PLAT213\_ALERT\_2\_B Atom C62 has ADP max/min Ratio ..... 4.3 prolat  
 PLAT220\_ALERT\_2\_B NonSolventResd 1 C Ueq(max) / Ueq(min) Range 7.0 Ratio  
 PLAT241\_ALERT\_2\_B High MainMolUeq as Compared to Neighbors of O1 Check

PLAT241\_ALERT\_2\_B High MainMolUeq as Compared to Neighbors of C60 Check  
 PLAT241\_ALERT\_2\_B High MainMolUeq as Compared to Neighbors of C62 Check  
 PLAT242\_ALERT\_2\_B Low MainMolUeq as Compared to Neighbors of Cd1 Check  
 PLAT242\_ALERT\_2\_B Low MainMolUeq as Compared to Neighbors of C00Z Check  
 PLAT420\_ALERT\_2\_B D-H Without Acceptor O7 --H7A. Please Check

Explanation: All these alerts have been generated probably due to some disorder in the structure.

**Determination of formula & solvent composition of CSMCRI-9 from PLATON Squeeze and Thermogravimetric analysis data:**

From the TGA plot of as-synthesized **CSMCRI-9**, the observed mass loss is 29.61 %

From PLATON Squeeze program void electron count / unit cell comes out to be 165

As the asymmetric unit is electrically neutral and, during the synthesis, DMA and water were used as solvents; so the void space should be occupied by these lattice solvent molecules.

Now, formula of the asymmetric unit excluding all guests is  $[\text{Cd}_{1.5}(\text{TCA})(\text{bpg})_{0.5}(\text{H}_2\text{O})]$ , and mass of this asymmetric unit is 658.61

**Table S2.** Number of electrons and molecular mass of guest molecules associated with **CSMCRI-9** for determination of solvent composition and molecular formula

|                  | Dimethyl<br>acetamide (DMA) | Water |
|------------------|-----------------------------|-------|
| No. of electrons | 48                          | 10    |
| mass             | 87                          | 18    |

Considering the above mentioned number of electrons, the best possible combination of solvent molecules for **CSMCRI-9** could be  $[\text{Cd}_{1.5}(\text{TCA})(\text{bpg})_{0.5}(\text{H}_2\text{O})] \cdot 3\text{DMA} \cdot 2\text{H}_2\text{O}$

The total number of electrons contributed by lattice solvent molecules will be  $[(48 \times 3) + (10 \times 2)] = 164$ , which is in well agreement with the PLATON result and thus validates the above formula.

The aforementioned combination was further cross-checked from TGA analysis.

Total mass loss due to solvents is  $[(87 \times 3) + (18 \times 2)] = 297$

Therefore total mass of **CSMCRI-9** including all the guests is  $(658.61 + 297) = 955.61$

So mass loss due to solvents is  $[(297/955.61) \times 100] \% = 31.07 \%$ , which is in good agreement with that of the TGA result.

**Table S3.** A comparison for BET surface area and CO<sub>2</sub> adsorption capacity of some well reported MOFs at 1 bar

| Sl. No. | MOF                                                                                                              | BET Surface Area (m <sup>2</sup> /g) | Uptake capacity (273 K) | Uptake capacity (298 K)  | References                                                                                               |
|---------|------------------------------------------------------------------------------------------------------------------|--------------------------------------|-------------------------|--------------------------|----------------------------------------------------------------------------------------------------------|
| 1.      | SNU-5                                                                                                            | –                                    | 38.5wt%<br>8.75 mmol/g  | –                        | <i>Angew.Chem.Int.Ed</i> <b>2008</b> ,47, 7741–7745                                                      |
| 2.      | PCN-124                                                                                                          | 1372                                 | 28.6wt%<br>6.5 mmol/g   | –                        | <i>Chem. Commun.</i> <b>2012</b> , 48, 9995-9997                                                         |
| 3.      | Cu-NTTA                                                                                                          | 3931                                 | 22.7 wt%<br>5.15 mmol/g | 12.86 wt%<br>2.92 mmol/g | <i>ACS Appl. Mater. Interfaces</i> <b>2016</b> , 8, 31746–31756                                          |
| 4.      | NUM-3a                                                                                                           | 2111.2                               | 22.19wt%<br>5.04 mmol/g | 16.30 wt%<br>3.70 mmol/g | <i>ACS Appl. Mater. Interfaces</i> <b>2017</b> , 9, 26177–26183                                          |
| 5.      | CPF-6                                                                                                            | 599                                  | 19.25wt%<br>4.37 mmol/g | –                        | <i>J. Am. Chem.Soc.</i> <b>2012</b> , 134, 784–787                                                       |
| 6.      | IRMOF-9                                                                                                          | 1904                                 | 7.85 wt%<br>1.78 mmol/g | –                        | <i>Chem. Commun.</i> <b>2014</b> , 50, 3238-3241 & <i>J. Am. Chem. Soc.</i> <b>2006</b> , 128, 1304-1315 |
| 7.      | TTF-4                                                                                                            | 1172                                 | 13.3 wt%<br>3.02 mmol/g | 7.54 wt%<br>1.71 mmol/g  | <i>Chem. Commun.</i> <b>2016</b> , 52, 5625-5628                                                         |
| 8.      | [Zn <sub>5</sub> (μ <sub>3</sub> -OH) <sub>2</sub> (DBTA) <sub>2</sub> (H <sub>2</sub> O) <sub>4</sub> ·solvents | 1591                                 | 12 wt%<br>2.72 mmol/g   | 7.1 wt%<br>1.61 mmol/g   | <i>Inorg. Chem.</i> <b>2019</b> , 58, 15637–15643                                                        |
| 9.      | JLU-Liu31                                                                                                        | 1700                                 | 6.86 wt%<br>1.56 mmol/g | 3.39 wt%<br>0.75 mmol/g  | <i>J. Mater. Chem. A.</i> <b>2016</b> , 4, 15081-15087                                                   |
| 10.     | UCY-1                                                                                                            | 2067                                 | 6.16 wt%<br>1.4 mmol/g  | 4.31 wt%<br>0.98 mmol/g  | <i>Inorg. Chem.</i> <b>2011</b> , 50, 11297-11299                                                        |
| 11.     | SNU-70                                                                                                           | 5290                                 | 6.14 wt%<br>1.39 mmol/g | 3.49 wt%<br>0.79 mmol/g  | <i>Chem.– Eur. J.</i> <b>2012</b> , 18, 8673 – 8680                                                      |
| 12.     | SNU-71                                                                                                           | 1770                                 | 7.75 wt%<br>1.76 mmol/g | 4.6 wt%<br>1.04 mmol/g   | <i>Chem.- Eur. J.</i> <b>2012</b> , 18, 8673 – 8680                                                      |
| 13.     | Ni-MOF-1                                                                                                         | 152                                  | 7.37 wt%<br>1.68 mmol/g | –                        | <i>Inorg. Chem. Commun.</i> <b>2019</b> , 104,78-82                                                      |
| 14.     | SALI-DAP                                                                                                         | 1225                                 | 10.1 wt%                | –                        | <i>Chem. Commun.</i> ,                                                                                   |

|     |                                                                                                                                                                                        |                 |                                                         |                                                          |                                                                  |
|-----|----------------------------------------------------------------------------------------------------------------------------------------------------------------------------------------|-----------------|---------------------------------------------------------|----------------------------------------------------------|------------------------------------------------------------------|
|     |                                                                                                                                                                                        |                 | 2.29 mmol/g                                             |                                                          | <b>2015, 51, 12478-12481</b>                                     |
| 15. | BIF-9-Li                                                                                                                                                                               | 1523            | 6.6 wt%<br>1.5 mmol/g                                   | –                                                        | <i>J. Am. Chem. Soc.</i> <b>2009, 131</b> , 6111-6113            |
| 16  | rht-MOF-1                                                                                                                                                                              | 2100            | 17.7 wt%<br>4.02 mmol/g                                 | 10.7 wt%<br>2.43 mmol/g                                  | <i>Chem. Commun.</i> <b>2015, 51</b> , 9636-9639                 |
| 17. | CAU-1                                                                                                                                                                                  | 1268            | 24.1 wt%<br>5.47 mmol/g                                 | –                                                        | <i>Energy Environ. Sci.</i> <b>2011, 4</b> , 4522-4527           |
| 18. | {[Zn <sub>2</sub> (TPOM)(3,7-DBTDC) <sub>2</sub> ]·7H <sub>2</sub> O·DMA} <sub>n</sub><br>&<br>{[Cd <sub>2</sub> (TPOM)(3,7-DBTDC) <sub>2</sub> ]·6H <sub>2</sub> O·3DMF} <sub>n</sub> | 267<br>&<br>432 | 5.53 wt%<br>1.25 mmol/g<br>&<br>7.42 wt%<br>1.68 mmol/g | 3.69 wt%<br>0.83 mmol/g<br>&<br>4.43 wt%<br>1.008 mmol/g | <i>ACS Appl. Mater. Interfaces</i> <b>2020, 12</b> , 11724-11736 |
| 19. | FJU-44                                                                                                                                                                                 | 629.5           | 16.38 wt%<br>3.72 mmol/g                                | –                                                        | <i>Inorg. Chem.</i> <b>2019, 58</b> , 7754-7759                  |
| 20. | <b>CSMCRI-9</b>                                                                                                                                                                        | –               | 14.69 wt%<br>3.34 mmol/g                                | 7.59 wt%<br>1.72 mmol/g                                  | <b>This work</b>                                                 |

**Table S4.** A comparison of catalytic performance of activated **CSMCRI-9** in CO<sub>2</sub> cycloaddition to that of other MOF materials

| Sl. No. | MOF                                                | Reaction Condition    | Yield (%) | Reference                                               |
|---------|----------------------------------------------------|-----------------------|-----------|---------------------------------------------------------|
| 1.      | Co-MOF-74                                          | 100 °C, 19.7 bar, 4 h | 96        | <i>Catal. Today</i> <b>2012, 185</b> , 35-40            |
| 2.      | Mg-MOF-74                                          | 100 °C, 19.7 bar, 4 h | 95        | <i>Energy Environ. Sci.</i> <b>2012, 5</b> , 6465-6473  |
| 3.      | Cr-MIL-101                                         | 25 °C, 8 bar, 48 h    | 95        | <i>J. Catal.</i> <b>2013, 298</b> , 179-185             |
| 4.      | Hf-NU-1000                                         | RT, 1 bar, 56 h       | 100       | <i>J. Am. Chem. Soc.</i> <b>2014, 136</b> , 15861-15864 |
| 5.      | gea-MOF-1                                          | 120 °C, 20 bar, 6h    | 85        | <i>Nat. Chem.</i> <b>2014, 6</b> , 673-680              |
| 6.      | {Cu(Hip) <sub>2</sub> (Bpy)} <sub>n</sub><br>(CHB) | 120 °C, 12bar, 6h     | 56        | <i>Green Chem.</i> <b>2014, 16</b> , 1607-1616          |
| 7.      | Ni-TCPE2                                           | 100 °C, 9.9 bar, 12 h | 86.2      | <i>J. Am. Chem. Soc.</i> <b>2015, 137</b> , 15066-      |

|     |                                                                              |                    |      |                                                                  |
|-----|------------------------------------------------------------------------------|--------------------|------|------------------------------------------------------------------|
|     |                                                                              |                    |      | 15069                                                            |
| 8.  | Zn-NTTA                                                                      | 100 °C, 10bar, 8h  | 98.2 | <i>ACS Appl. Mater. Interfaces</i> <b>2016</b> , 8, 31746–31756  |
| 9.  | UiO–67–IL                                                                    | 90 °C, 1 bar, 12 h | 98   | <i>Inorg. Chem.</i> <b>2017</b> , 56, 2337–2344                  |
| 10. | ZnMOF-1- NH <sub>2</sub>                                                     | 80 °C, 8bar, 8h    | 88   | <i>Dalton Trans.</i> , <b>2018</b> , 47, 8041–8051               |
| 11. | {[LnL(H <sub>2</sub> O) <sub>2</sub> ]·H <sub>2</sub> O} <sub>n</sub>        | 70 °C, 1bar, 12h   | 89.7 | <i>Cryst. Growth Des.</i> <b>2018</b> , 18, 2956–2963            |
| 12. | MOF-892                                                                      | 80 °C, 1 bar, 16h  | 82   | <i>ACS Appl. Mater. Interfaces</i> <b>2018</b> , 10, 733–744     |
| 13. | NH <sub>2</sub> –MIL–101(Al)                                                 | 120 °C, 18 bar, 6h | 96   | <i>Dalton Trans.</i> <b>2018</b> , 47, 418–428                   |
| 14. | InDCPN-Cl                                                                    | 80 °C, 1 bar, 24 h | 71   | <i>Chem. Mater.</i> <b>2019</b> , 31, 1084–1091                  |
| 15. | {[Co(TCPB) <sub>0.5</sub> (H <sub>2</sub> O)]·DMF} <sub>n</sub>              | RT, 1bar, 24 h     | 94   | <i>Cryst. Growth Des.</i> <b>2019</b> , 19, 2010–2018            |
| 16. | {[Co( <b>OBA</b> )(L)] <sub>x</sub> G} <sub>n</sub>                          | 60 °C, 1 bar, 12 h | 99   | <i>J. Mater. Chem. A</i> , <b>2019</b> , 7, 2884–2894            |
| 17. | {[Zn <sub>2</sub> (3-tpom)(L) <sub>2</sub> ]·2H <sub>2</sub> O} <sub>n</sub> | 40 °C, 1 bar, 24h  | 55   | <i>Inorg. Chem.</i> <b>2020</b> , 59, 4273–4281                  |
| 18. | {[Cu-(MTABA)(H <sub>2</sub> O)]·4H <sub>2</sub> O·2EtOH·DMF} <sub>n</sub>    | RT, 1 bar, 24 h    | 68   | <i>ACS Appl. Mater. Interfaces</i> <b>2020</b> , 12, 37137–37146 |
| 19. | CoMOF-2                                                                      | 40 °C, 1 bar, 12 h | 99   | <i>Appl. Cat. A</i> , <b>2020</b> , 590, 117375                  |
| 20. | <b>CSMCRI-9</b>                                                              | 65°C, 10 bar, 6 h  | 99.9 | <b>This work</b>                                                 |

**Table S5.** Calculation of standard deviation of fluorescence intensity and limit of detection for **9a** towards DCNA

| Blank Readings (9a)                             | Fluorescence Intensity(CPS)          |
|-------------------------------------------------|--------------------------------------|
| Reading 1                                       | 15377871                             |
| Reading 2                                       | 15354689                             |
| Reading 3                                       | 15321964                             |
| Reading 4                                       | 15288782                             |
| Reading 5                                       | 15227191                             |
| <b>Standard Deviation (<math>\sigma</math>)</b> | 59097.84                             |
| <b>Slope from Graph (<math>m</math>)</b>        | $1.858 \times 10^6 \mu\text{M}^{-1}$ |
| <b>Detection limit (<math>3\sigma/m</math>)</b> | 95 nM                                |

|                                 |          |
|---------------------------------|----------|
| <b>Limit of Detection (LOD)</b> | 62.4 ppb |
|---------------------------------|----------|

**Table S6.** Calculation of standard deviation of fluorescence intensity and limit of detection for **9a** towards TNP

| <b>Blank Readings (9a)</b>                      | <b>Fluorescence Intensity(CPS)</b>   |
|-------------------------------------------------|--------------------------------------|
| Reading 1                                       | 15377871                             |
| Reading 2                                       | 15354689                             |
| Reading 3                                       | 15321964                             |
| Reading 4                                       | 15288782                             |
| Reading 5                                       | 15227191                             |
| <b>Standard Deviation (<math>\sigma</math>)</b> | 59097.84                             |
| <b>Slope from Graph (<math>m</math>)</b>        | $2.679 \times 10^6 \mu\text{M}^{-1}$ |
| <b>Detection limit (<math>3\sigma/m</math>)</b> | 66 nM                                |
| <b>Limit of Detection (LOD)</b>                 | 43.4 ppb                             |

**Table S7.** Calculation of standard deviation of fluorescence intensity and limit of detection for **9a** towards NZF

| <b>Blank Readings (9a)</b>                      | <b>Fluorescence Intensity(CPS)</b> |
|-------------------------------------------------|------------------------------------|
| Reading 1                                       | 15377871                           |
| Reading 2                                       | 15354689                           |
| Reading 3                                       | 15321964                           |
| Reading 4                                       | 15288782                           |
| Reading 5                                       | 15227191                           |
| <b>Standard Deviation (<math>\sigma</math>)</b> | 59097.84                           |
| <b>Slope from Graph (<math>m</math>)</b>        | $956324.05 \mu\text{M}^{-1}$       |
| <b>Detection limit (<math>3\sigma/m</math>)</b> | 0.18 $\mu\text{M}$                 |
| <b>Limit of Detection (LOD)</b>                 | 118.3 ppb                          |

#### Detailed calculations of limit of detection (LOD) for **9a**.

Limit of detection (LOD) =  $3\sigma/k$ , where  $\sigma$  is the standard deviation of five consecutive blank measurements of emission intensity of **9a** at regular time intervals,  $k$  = slope of the curve of decrease in fluorescence intensity of **9a** versus volume of added analyte.

Now, the five consecutive emission intensities (in CPS unit) at regular time intervals are

15377871, 15354689, 15321964, 15288782 and 15227191

Standard deviation ( $\sigma$ ) = square root of  $\{\Sigma(x_i - \mu)^2 / (N-1)\}$ , where  $x_i$  are the each value of emission intensity,  $\mu$  is the mean of emission intensities and  $N$  is the number of intensity values.

**Table S8.** Calculation of standard deviation of emission intensities for **9a**

| $x_i$    | $\mu$      | $x_i - \mu$ | $(x_i - \mu)^2$ | $\Sigma(x_i - \mu)^2$  |
|----------|------------|-------------|-----------------|------------------------|
| 15377871 | 15314099.4 | 63771.6     | 4066816966.56   | $1.397 \times 10^{10}$ |
| 15354689 |            | 40589.6     | 1647515628.16   |                        |
| 15321964 |            | 7864.6      | 61851933.16     |                        |
| 15288782 |            | -25317.4    | 640940742.76    |                        |
| 15227191 |            | -86908.4    | 7553069990.56   |                        |

Here  $N = 5$

So,  $\sigma$  = square root of  $\{(1.397 \times 10^{10}) / (5-1)\} = 59097.84$

For DCNA, slope of the graph from the linear region of fluorescence intensity of **9a** versus concentration of DCNA ( $k$ ) =  $1.858 \times 10^6 \mu\text{M}^{-1}$

So, the LOD value for DCNA =  $(3 \times 59097.84) / 1.858 \times 10^6 \mu\text{M} = 95421.7 \times 10^{-6} \mu\text{M} = 95 \times 10^3 \times 10^{-6} \times 10^{-6} \text{M} = 95 \times 10^{-9} \text{M} = 95 \text{ nM}$

i.e. LOD =  $95 \text{ nM} \times \text{mass of asymmetric unit of CSMCRI-9} = 95 \times 658.61 \text{ ppb} = 62.4 \text{ ppb}$

Similarly, for TNP, slope of the graph from the linear region of fluorescence intensity of **9a** versus concentration of TNP ( $k$ ) =  $2.679 \times 10^6 \mu\text{M}^{-1}$

So, the LOD value for TNP =  $(3 \times 59097.84) / 2.679 \times 10^6 \mu\text{M} = 66178.9 \times 10^{-6} \mu\text{M} = 66 \times 10^3 \times 10^{-6} \times 10^{-6} \text{M} = 66 \times 10^{-9} \text{M} = 66 \text{ nM}$

i.e. LOD =  $66 \text{ nM} \times \text{mass of asymmetric unit of CSMCRI-9} = 66 \times 658.61 \text{ ppb} = 43.4 \text{ ppb}$

For NZF, slope of the graph from the linear region of fluorescence intensity of **9a** versus concentration of NZF ( $k$ ) =  $956324.05 \mu\text{M}^{-1}$

So, the LOD value for NZF =  $(3 \times 59097.84) / 956324.05 \mu\text{M} = 0.18 \mu\text{M}$ .

i.e. LOD =  $0.18 \mu\text{M} \times \text{mass of asymmetric unit of CSMCRI-9} = 0.18 \times 658.61 \text{ ppb} = 118.3 \text{ ppb}$ .

**Table S9.** A comparison of quenching constant, their LOD values, of various luminescent MOFs used for detection of DCNA

| Sl. No. | LMOF/ Coordination Polymer                      | Quenching constant ( $M^{-1}$ ) | Limit of Detection (LOD) | Medium used | Ref.                                                             |
|---------|-------------------------------------------------|---------------------------------|--------------------------|-------------|------------------------------------------------------------------|
| 1.      | $\{Zn_4(TPOM)(1,4-NDC)_4\}_n$                   | $2.74 \times 10^4$              | 0.28 ppm                 | water       | <i>ACS Appl. Mater. Interfaces</i> <b>2018</b> , 10, 42406–42416 |
| 2.      | $[Zn_2(bpdC)_2(BPyTPE)]$                        | –                               | 0.13 ppm                 | DCM         | <i>Chem. Commun.</i> <b>2017</b> , 53, 9975--9978                |
| 3.      | $[Zn_2(L)_2(TPA)] \cdot 2H_2O$                  | $2.36 \times 10^4$              | 0.39 ppm                 | Methanol    | <i>New J. Chem.</i> <b>2019</b> , 43, 2353--2361                 |
| 4.      | $[Zn_3(DDB)(DPE)] \cdot H_2O$                   | $3.3 \times 10^4$               | 166 ppb                  | water       | <i>Dalton Trans.</i> , <b>2019</b> , 48, 16776–16785             |
| 5.      | $[Cd_3(CBCD)_2(DMA)_4(H_2O)_2] \cdot 10DMA$     | $4.47 \times 10^4$              | 145 ppb                  | DMA         | <i>Dalton Trans.</i> <b>2019</b> , 48, 2683–2691                 |
| 6.      | $[Mg_2(APDA)_2(H_2O)_3] \cdot 5DMA \cdot 5H_2O$ | $7.50 \times 10^4$              | 150 ppb                  | DMF         | <i>Inorg. Chem.</i> <b>2018</b> , 57, 13330–13340                |
| 7.      | $[Ag(CIP^-)]$                                   | $5.2 \times 10^4$               | 105 ppb                  | DMF         | <i>Dalton Trans.</i> <b>2019</b> , 48, 10892–10900               |
| 8.      | <b>CSMCRI-9</b>                                 | $4.96 \times 10^4$              | 95 nM<br>62.4 ppb        | water       | <b>This work</b>                                                 |

**Table S10.** A comparison of quenching constant, their LOD values, of various luminescent MOFs used for detection of TNP

| Sl. No. | LMOF/Coordination polymer                                                           | Quenching constant ( $M^{-1}$ ) | Limit of Detection (LOD)  | Medium used | Ref.                                                    |
|---------|-------------------------------------------------------------------------------------|---------------------------------|---------------------------|-------------|---------------------------------------------------------|
| 1.      | bio- MOF-1<br>$[Zn_8(ad)_4(BPDC)_6O \cdot 2 Me_2NH_2] \cdot G$<br>(G=DMF and water) | $4.6 \times 10^4$               | 12.9 nM<br>(2.9 ppb)      | water       | <i>Chem. –Eur. J.</i> , <b>2015</b> , 21, 965 – 969     |
| 2.      | Ur-MOF<br>$[Zn_4(DMF)(Ur)_2(NDC)_4]$                                                | $10.83 \times 10^4$             | 7.1 $\mu M$<br>(1.63 ppm) | water       | <i>Cryst. Growth Des.</i> , <b>2015</b> , 15, 4627–4634 |
| 3.      | $Zn_2(H_2L)_2(Bpy)_2(H_2O)_3 \cdot H_2O$                                            | $1.36 \times 10^4$              | 0.49 $\mu M$              | water       | <i>Cryst. Growth Des.</i> <b>2017</b> , 17, 3170–3177   |
| 4.      | $\{[Cd_2(tdZ)_2(4,4'-bpy)_2] \cdot 6.5H_2O\}_n$                                     | $4.86 \times 10^4$              | 1.4 ppm                   | water       | <i>Dalton Trans.</i> , <b>2019</b> , 48, 2388–2398      |
| 5.      | $[Tb_2(L_9)_3(H_2O)_2] \cdot 21H_2O$                                                | $9.2 \times 10^3$               | 67 ppb                    | water       | <i>J. Mater. Chem. A</i> , <b>2017</b> , 5, 1952–       |

|     |                                                                                                                                                     |                    |                                |              |                                                                  |
|-----|-----------------------------------------------------------------------------------------------------------------------------------------------------|--------------------|--------------------------------|--------------|------------------------------------------------------------------|
|     |                                                                                                                                                     |                    |                                |              | 1956                                                             |
| 6.  | $[\text{Cd}(\text{L}_4)(\text{L}_5)]_n$                                                                                                             | $2.68 \times 10^4$ | 0.27 $\mu\text{M}$<br>(62 ppb) | water        | <i>Dalton Trans.</i> ,<br><b>2016</b> , 45, 7881-7892            |
| 7.  | $\{[\text{Zn}_2(\text{TPOM})(\text{NH}_2\text{-BDC})_2] \cdot 4\text{H}_2\text{O}\}_n$                                                              | $4.6 \times 10^4$  | 0.98 $\mu\text{M}$             | DMF          | <i>J. Mater. Chem. A</i> , <b>2016</b> , 4, 15494–15500          |
| 8.  | BUT-12<br>$[\text{Zr}_6\text{O}_4(\text{OH})_8(\text{H}_2\text{O})_4(\text{CTTA})_{8/3}]$                                                           | $3.1 \times 10^5$  | 23 ppb                         | water        | <i>J. Am. Chem. Soc.</i> , <b>2016</b> , 138, 6204–6216          |
| 9.  | $\{[\text{Cd}_4(\text{L}_6)_2(2\text{-amino-4,4-bipyridine})_3(\text{H}_2\text{O})_2](8\text{DMF})(8\text{H}_2\text{O})\}_n$                        | $3.89 \times 10^4$ | 1.98 ppm                       | Ethanol      | <i>Inorg. Chem.</i> <b>2016</b> , 55, 1741-1747                  |
| 10. | $[(\text{CH}_3)_2\text{NH}_2]_3[\text{Zn}_4\text{Na}(\text{L}_3)_3] \cdot 4\text{CH}_3\text{OH} \cdot 2\text{DMF}$                                  | $3.2 \times 10^4$  | 5 $\mu\text{M}$                | DMF          | <i>J. Mater Chem. A</i> <b>2015</b> , 3, 7224-7228               |
| 11. | $\{[\text{W}_2(\mu_3\text{-S})_6(\mu_4\text{-S})_2\text{Cu}_8(\text{CN})_4(3\text{-abpt})] \cdot \text{CH}_3\text{CN} \cdot \text{H}_2\text{O}\}_n$ | $7.66 \times 10^4$ | 0.81 $\mu\text{M}$             | Acetonitrile | <i>Inorg. Chem.</i> <b>2019</b> , 58, 9749-9755                  |
| 12. | $[\text{Tb}(\text{TCBA})(\text{H}_2\text{O})_2]_2 \cdot \text{DMF}$                                                                                 | $4.69 \times 10^6$ | 1.64 ppb                       | Ethanol      | <i>Inorg. Chem.</i> <b>2019</b> , 58, 8198-8207                  |
| 13. | $\{[\text{Cd}(\text{ATAIA})] \cdot 4\text{H}_2\text{O}\}_n$                                                                                         | $1.59 \times 10^7$ | 0.94 nM                        | Water        | <i>ACS Appl. Mater. Interfaces</i> <b>2018</b> , 10, 25360–25371 |
| 14. | $[\text{Tb}(1,3,5\text{-BTC})]_n$                                                                                                                   | $3.4 \times 10^4$  | 81 nM                          | Ethanol      | <i>J. Mater. Chem. A</i> , <b>2013</b> , 1, 8745–8752            |
| 15. | <b>CSMCRI-9</b>                                                                                                                                     | $2.46 \times 10^4$ | 66 nM<br>43.4 ppb              | water        | <b>This work</b>                                                 |

**Table S11.** A comparison of quenching constant, their LOD values, of various luminescent MOFs used for detection of NZF

| Sl. No. | LMOF/ Coordination Polymer                                                                       | Quenching constant ( $\text{M}^{-1}$ ) | Limit of Detection (LOD) | Medium used | Ref.                                                  |
|---------|--------------------------------------------------------------------------------------------------|----------------------------------------|--------------------------|-------------|-------------------------------------------------------|
| 1.      | $[\text{Mg}_2(\text{APDA})_2(\text{H}_2\text{O})_3] \cdot 5\text{DMA} \cdot 5\text{H}_2\text{O}$ | $9.00 \times 10^4$                     | 108 ppb                  | DMF         | <i>Inorg. Chem.</i> <b>2018</b> , 57, 13330–13340     |
| 2.      | $[\text{Cd}_3(\text{CBCD})_2(\text{DMA})_4(\text{H}_2\text{O})_2] \cdot 10\text{DMA}$            | $9.72 \times 10^4$                     | 85 ppb                   | DMA         | <i>Dalton Trans.</i> <b>2019</b> , 48, 2683–2691      |
| 3.      | BUT-12<br>BUT-13                                                                                 | $1.1 \times 10^5$<br>$7.5 \times 10^4$ | 58 ppb<br>90 ppb         | water       | <i>J. Am. Chem. Soc.</i> <b>2016</b> , 138, 6204–6216 |

|     |                                                                                                                    |                     |                                 |       |                                                         |
|-----|--------------------------------------------------------------------------------------------------------------------|---------------------|---------------------------------|-------|---------------------------------------------------------|
| 4.  | $\{[\text{Eu}_2(\text{BCA})_3(\text{H}_2\text{O})(\text{DMF})_3] \cdot 0.5\text{DMF} \cdot \text{H}_2\text{O}\}_n$ | $2.2 \times 10^4$   | 0.16 $\mu\text{M}$              | water | <i>Chem.–Eur. J.</i> <b>2017</b> , 23, 10293 – 10300    |
| 5.  | $\{[\text{Zn}_2(\text{Py}_2\text{Tz})_2(\text{BDC})_2] \cdot 2(\text{DMF}) \cdot 0.5(\text{H}_2\text{O})\}_n$      | $1.726 \times 10^4$ | 0.91 $\mu\text{M}$              | water | <i>Cryst. Growth Des.</i> <b>2018</b> , 18, 7173–7182   |
| 6.  | TMPyPE@bio-MOF-1                                                                                                   | $4.48 \times 10^4$  | 0.11 ppm                        | water | <i>J. Mater. Chem. C</i> , <b>2019</b> , 7, 8383–8388   |
| 7.  | $\{[\text{Tb}(\text{TATMA})(\text{H}_2\text{O}) \cdot 2\text{H}_2\text{O}]\}_n$                                    | $3.0 \times 10^4$   | NA                              | water | <i>Inorg. Chem.</i> <b>2019</b> , 58, 7746–7753         |
| 8.  | $[(\text{Zn}_4\text{O})_2(\text{PDDA})_6(\text{H}_2\text{O})_2] \cdot 10\text{DMF}$                                | $6.08 \times 10^4$  | NA                              | DMF   | <i>Cryst. Growth Des.</i> <b>2019</b> , 19, 5228–5236   |
| 9.  | $[\text{NaCd}_2(\text{L})(\text{BDC})_{2.5}] \cdot 9\text{H}_2\text{O}$                                            | $5.06 \times 10^4$  | 162 ppb                         | DMF   | <i>J. Mater. Chem. A</i> , <b>2017</b> , 5, 15797–15807 |
| 10. | <b>CSMCRI-9</b>                                                                                                    | $4.81 \times 10^4$  | 0.18 $\mu\text{M}$<br>118.3 ppb | water | <b>This work</b>                                        |

**Table S12.** HOMO and LUMO energy levels of different pesticides calculated by density functional theory (DFT) at B3LYP/6-311++G\*\* accuracy level, using Gaussian 09 package of programs

| Analytes | HOMO (eV) | LUMO (eV) | Energy gap (eV) |
|----------|-----------|-----------|-----------------|
| DCNA     | -6.67     | -3.01     | 3.66            |
| TCHDE    | -6.47     | -1.33     | 5.14            |
| DCP      | -6.64     | -1.15     | 5.49            |
| HCL      | -7.12     | -1.17     | 5.95            |
| IPT      | -6.04     | -0.56     | 5.48            |
| BHP      | -6.08     | -0.70     | 5.38            |
| DUN      | -6.34     | -1.06     | 5.28            |
| bpg      | -7.47     | -1.55     | 5.92            |

**Table S13.** HOMO and LUMO energy levels of different nitroanalytes calculated by density functional theory (DFT) at B3LYP/6-311++G\*\* accuracy level, using Gaussian 09 package of programs

| Analytes | HOMO (eV) | LUMO (eV) | Energy gap (eV) |
|----------|-----------|-----------|-----------------|
| TNP      | -8.61     | -4.30     | 4.31            |
| 2,4-DNP  | -8.05     | -3.77     | 4.28            |
| 4-NP     | -7.34     | -2.75     | 4.59            |
| 3-NP     | -7.20     | -2.90     | 4.30            |
| 2-NP     | -7.22     | -3.18     | 4.04            |
| 2,4-DNT  | -8.42     | -3.39     | 5.03            |
| 4-NT     | -7.70     | -2.79     | 4.91            |
| DMDNB    | -8.65     | -2.83     | 5.82            |
| bpg      | -7.47     | -1.55     | 5.92            |

**Table S14.** HOMO and LUMO energy levels of different antibiotics calculated by density functional theory (DFT) at B3LYP/6-311++G\*\* accuracy level, using Gaussian 09 package of programs

| Analytes | HOMO (eV) | LUMO (eV) | Energy gap (eV) |
|----------|-----------|-----------|-----------------|
| NZF      | -6.79     | -3.14     | 3.65            |
| NFT      | -7.37     | -3.66     | 3.71            |
| FZD      | -7.15     | -3.49     | 3.66            |
| DTZ      | -7.30     | -2.76     | 4.54            |
| MDZ      | -7.34     | -2.85     | 4.49            |
| ODZ      | -7.32     | -2.89     | 4.43            |
| SMZ      | -6.53     | -1.17     | 5.36            |
| SDZ      | -6.59     | -1.46     | 5.13            |
| THI      | -7.70     | -2.00     | 5.70            |
| bpg      | -7.47     | -1.55     | 5.92            |

## References

1. *SAINT+*, version 6.02; Bruker AXS: Madison, WI, 1999.
2. G. M. Sheldrick, *SADABS*, Empirical Absorption Correction Program; University of Göttingen: Göttingen, Germany, 1997.
3. *XPREF*, version 5.1; Siemens Industrial Automation Inc.: Madison, WI, 1995.
4. G. M. Sheldrick, *SHELXTL* Reference Manual: version 5.1; Bruker AXS: Madison, WI, 1997.
5. G. M. Sheldrick, *SHELXL-2014/7*; University of Göttingen: Göttingen, Germany.
6. A. L. Spek, *PLATON*; The University of Utrecht: Utrecht, The Netherlands, 1999.
7. <http://www.topos.ssu.samara.ru>; V. A. Blatov, *IUCrCompCommNewsletter* 2006, 7, 4.
8. S. Nandi, D. Chakraborty, R. Vaidhyanathan, Permanently Porous Single Molecule H-Bonded Organic Framework for Selective CO<sub>2</sub> Capture, *Chem. Commun.* 2016, **52**, 7249-7252.
9. Y. Yuan, J. T. Li, X. D. Sun, G. H. Li, Y. L. Liu, G. Verma and S. Q. Ma, Indium-organic frameworks based on dual secondary building units featuring halogen-decorated channels for highly effective CO<sub>2</sub> fixation, *Chem. Mater.*, 2019, **31**, 1084–1091.
